# Supplementary material
Source: PubMed Central journal article supplement (PMC2890043)
Supplement: NIHMS184170-supplement-Tables_S1-S7.pdf [file NIHMS184170-supplement-Tables_S1-S7.pdf]

---

## Supplementary Data

---

# Genome-wide Mutational Diversity in an Evolving Population of *Escherichia coli*

J.E. Barrick and R.E. Lenski

*Department of Microbiology and Molecular Genetics  
Michigan State University, East Lansing, Michigan 48824*

Correspondence: [lenski@msu.edu](mailto:lenski@msu.edu)

### Tables S1-S7 | SNPs predicted in mixed-population samples

For all predicted SNPs in mixed-population samples, the negative base-10 logarithm of the E-value, maximum-likelihood prediction of the frequency of the derived allele in the population, 95% confidence limit on the frequency of the derived allele, nucleotide position, base change from ancestral sequence, gene (e.g., *araJ*) or intergenic region (e.g., *rspA/ynfA*) containing the SNP, and amino acid change caused by the SNP are shown. Stop codons are represented by asterisks in the amino acid change column, and some SNPs do not have an amino acid change annotated because they occur within pseudogenes. In the notes column, samples where the same mutation was fixed (within statistical resolution) in a mixed-population sample (M) or present in a sequenced clone (C) at a given generation are marked in the notes column, with a plus sign further indicating that the mutation was also found in all later samples, and asterisks marking a few SNPs that appeared (erroneously, owing to statistical uncertainty) to have been fixed in earlier population samples. Some other mutations in the 2-20K samples that are likely to be beneficial because they are in the same gene or promoter region as mutations that later swept to fixation in this population (new allele), probably affect cellular processes known to be targets of selection in this experiment (cell wall, respiration, ribosome, regulation), or possibly improve growth on metabolic byproducts (acetate, SCFA) are marked. SNPs in 2-20K samples not shown in Table 2 of the main text are highlighted with three asterisks (\*\*\*)

**Table S1 | SNPs predicted in 2K mixed-population sample**

| <b>-log<sub>10</sub> E</b> | <b>fr new</b> | <b>95% CL</b>  | <b>position</b> | <b>base</b> | <b>gene</b> | <b>aa</b> | <b>notes</b> |
|----------------------------|---------------|----------------|-----------------|-------------|-------------|-----------|--------------|
| 16.7                       | 0.100         | [0.045, 0.192] | 648332          | A→T         | <i>mrdB</i> | V189E     | cell wall    |
| 12.2                       | 0.128         | [0.054, 0.249] | 3328657         | G→A         | <i>mreB</i> | P108S     | cell wall    |
| 12.2                       | 0.148         | [0.062, 0.284] | 2082685         | G→A         | <i>yegI</i> | A494V     | M5K+ C5K+    |
| 6.4                        | 0.069         | [0.020, 0.178] | 1734196         | T→G         | <i>pykF</i> | L411R     | new allele   |
| 4.2                        | 0.101         | [0.026, 0.231] | 4100655         | C→T         | <i>hslU</i> | M192I     | M5K+ C5K+    |
| 0.6                        | 0.044         | [0.009, 0.122] | 4201949         | G→A         | <i>iclR</i> | T204M     | new allele   |
| 0.2                        | 0.038         | [0.008, 0.101] | 4174746         | T→C         | <i>thiC</i> | Q322R     | ***          |

**Table S2 | SNPs predicted in 5K mixed-population sample**

| <b>-log<sub>10</sub> E</b> | <b>fr new</b> | <b>95% CL</b>  | <b>position</b> | <b>base</b> | <b>gene</b> | <b>aa</b> | <b>notes</b> |
|----------------------------|---------------|----------------|-----------------|-------------|-------------|-----------|--------------|
| 5.1                        | 0.944         | [0.853, 0.984] | 3248957         | A→T         | <i>infB</i> | D764E     | M10K+ C5K+   |
| 3.9                        | 0.929         | [0.834, 0.982] | 3483047         | C→A         | <i>malT</i> | R455S     | M10K+ C5K+   |
| 2.5                        | 0.068         | [0.014, 0.191] | 2268951         | T→G         | <i>atoC</i> | I129S     | SCFA         |
| 1.7                        | 0.949         | [0.855, 0.990] | 3762741         | A→T         | <i>spoT</i> | K662I     | *M2K+ C2K+   |
| 1.2                        | 0.045         | [0.009, 0.130] | 1485594         | G→T         | <i>ydcV</i> | L241L     | ***          |

**Table S3 | SNPs predicted in 10K mixed-population sample**

| <b>-log<sub>10</sub> E</b> | <b>fr new</b> | <b>95% CL</b>  | <b>position</b> | <b>base</b> | <b>gene</b>       | <b>aa</b> | <b>notes</b> |
|----------------------------|---------------|----------------|-----------------|-------------|-------------------|-----------|--------------|
| 80.8                       | 0.456         | [0.324, 0.594] | 3045069         | G→T         | <i>yghJ</i>       | T312N     | M20K+ C10K+  |
| 77.0                       | 0.331         | [0.232, 0.440] | 4560632         | T→C         | <i>hsdM</i>       | Y131C     | C10K         |
| 72.8                       | 0.616         | [0.482, 0.739] | 3370027         | T→A         | <i>rpsM</i>       | K117M     | M20K+ C10K+  |
| 69.9                       | 0.432         | [0.284, 0.590] | 380188          | A→C         | <i>araJ</i>       | F239L     | M20K+ C10K+  |
| 65.2                       | 0.538         | [0.379, 0.684] | 3339158         | A→C         | <i>yhdG/fis</i>   | –         | M20K+ C10K+  |
| 64.4                       | 0.341         | [0.215, 0.483] | 4266356         | G→C         | <i>acs/nrfA</i>   | –         | acetate      |
| 60.1                       | 0.573         | [0.432, 0.714] | 980180          | A→G         | <i>rpsA</i>       | D365G     | ribosome     |
| 49.0                       | 0.390         | [0.232, 0.556] | 1976879         | T→G         | <i>yedW/yedX</i>  | –         | M20K+ C10K+  |
| 44.3                       | 0.331         | [0.209, 0.494] | 2499315         | G→A         | <i>maeB/taIA</i>  | –         | C10K         |
| 23.4                       | 0.162         | [0.085, 0.275] | 2336064         | T→G         | <i>nuoM</i>       | I168L     | respiration  |
| 20.7                       | 0.136         | [0.060, 0.246] | 2342867         | T→G         | <i>nuoG</i>       | Q299P     | respiration  |
| 20.3                       | 0.230         | [0.102, 0.394] | 2329291         | A→T         | <i>elaD</i>       | A22A      | synonymous   |
| 4.9                        | 0.098         | [0.027, 0.232] | 1004244         | G→T         | <i>ompF/asnS</i>  | –         | new allele   |
| 3.8                        | 0.081         | [0.022, 0.193] | 4616396         | G→A         | <i>nadR</i>       | G290S     | M15K+ C15K+  |
| 3.8                        | 0.103         | [0.028, 0.237] | 1004243         | A→G         | <i>ompF/asnS</i>  | –         | new allele   |
| 3.4                        | 0.098         | [0.027, 0.226] | 4202659         | T→C         | <i>iclR/methH</i> | –         | new allele   |
| 2.9                        | 0.087         | [0.025, 0.212] | 88137           | A→G         | <i>leuO/ilvI</i>  | –         | regulation   |
| 2.3                        | 0.055         | [0.011, 0.147] | 2267833         | T→G         | <i>atoS</i>       | L364W     | SCFA         |
| 1.2                        | 0.069         | [0.014, 0.180] | 1708115         | G→A         | <i>lhr</i>        | G612D     | ***          |
| 0.5                        | 0.073         | [0.009, 0.228] | 1220098         | G→C         | <i>ycgH</i>       | –         | ***          |

**Table S4 | SNPs predicted in 15K mixed-population sample**

| <b>-log<sub>10</sub> E</b> | <b>fr new</b> | <b>95% CL</b>  | <b>position</b> | <b>base</b> | <b>gene</b>      | <b>aa</b> | <b>notes</b> |
|----------------------------|---------------|----------------|-----------------|-------------|------------------|-----------|--------------|
| 31.3                       | 0.828         | [0.727, 0.903] | 4201911         | C→T         | <i>iclR</i>      | A217T     | M20K+ C15K+  |
| 10.5                       | 0.906         | [0.811, 0.966] | 3370027         | T→A         | <i>rpsM</i>      | K117M     | M20K+ C10K+  |
| 6.8                        | 0.912         | [0.799, 0.973] | 161041          | T→G         | <i>pcnB</i>      | N302H     | M20K+ C15K+  |
| 5.2                        | 0.903         | [0.783, 0.967] | 3288092         | G→A         | <i>arcB</i>      | R57C      | M20K+ C15K+  |
| 4.8                        | 0.947         | [0.868, 0.986] | 3248957         | A→T         | <i>infB</i>      | D764E     | *M10K+ C5K+  |
| 4.6                        | 0.919         | [0.802, 0.979] | 1248380         | A→C         | <i>dhaM</i>      | D295E     | M20K+ C15K+  |
| 4.0                        | 0.945         | [0.863, 0.986] | 380188          | A→C         | <i>araJ</i>      | F239L     | M20K+ C10K+  |
| 3.9                        | 0.913         | [0.781, 0.978] | 1286699         | C→A         | <i>narI/ychS</i> | –         | M20K+ C15K+  |
| 2.3                        | 0.041         | [0.007, 0.128] | 9972            | T→G         | <i>yaaH</i>      | N174T     | acetate      |
| 2.1                        | 0.958         | [0.872, 0.993] | 3045069         | G→T         | <i>yghJ</i>      | T312N     | M20K+ C10K+  |
| 2.0                        | 0.077         | [0.016, 0.209] | 1769363         | G→T         | <i>ydiV/nlpC</i> | –         | regulation   |
| 1.8                        | 0.912         | [0.758, 0.984] | 1004251         | T→C         | <i>ompF/asnS</i> | –         | M20K+ C15K+  |
| 1.8                        | 0.076         | [0.021, 0.183] | 1024698         | G→A         | <i>ycbX/ycbY</i> | –         | ribosome     |
| 1.1                        | 0.939         | [0.842, 0.983] | 3339158         | A→C         | <i>yhdG/fis</i>  | –         | M20K+ C10K+  |
| 1.0                        | 0.959         | [0.877, 0.992] | 1976879         | T→G         | <i>yedW/yedX</i> | –         | M20K+ C10K+  |
| 0.8                        | 0.059         | [0.013, 0.166] | 3839556         | T→C         | <i>gyrB</i>      | S309G     | regulation   |
| 0.6                        | 0.952         | [0.859, 0.990] | 2082685         | G→A         | <i>yegI</i>      | A494V     | *M5K+ C5K+   |
| 0.4                        | 0.046         | [0.010, 0.127] | 1632389         | T→C         | <i>rspA/ynfA</i> | –         | regulation   |
| 0.0                        | 0.956         | [0.868, 0.991] | 3155168         | G→A         | <i>ebgR</i>      | G296S     | M20K+ C15K+  |

**Table S5 | SNPs predicted in 20K mixed-population sample**

| <b>-log<sub>10</sub> E</b> | <b>fr new</b> | <b>95% CL</b>  | <b>position</b> | <b>base</b> | <b>gene</b>      | <b>aa</b> | <b>notes</b> |
|----------------------------|---------------|----------------|-----------------|-------------|------------------|-----------|--------------|
| 40.0                       | 0.353         | [0.225, 0.507] | 2732014         | C→A         | <i>hypF</i>      | R91L      | M30K+ C20K+  |
| 1.3                        | 0.056         | [0.010, 0.148] | 1887465         | G→T         | <i>mgrB/yobH</i> | –         | regulation   |
| 0.3                        | 0.045         | [0.010, 0.124] | 3947797         | A→G         | <i>aslA</i>      | S4P       | ***          |
| 0.2                        | 0.111         | [0.013, 0.309] | 2193841         | A→C         | <i>yeiB</i>      | V122G     | ***          |
| 0.1                        | 0.099         | [0.020, 0.264] | 715754          | A→T         | <i>ybfC</i>      | R121*     | ***          |
| 0.0                        | 0.06          | [0.014, 0.149] | 1150654         | T→C         | <i>flgH</i>      | G174G     | ***          |

**Table S6 | SNPs predicted in 30K mixed-population sample**

| <b>-log<sub>10</sub> E</b> | <b>fr new</b> | <b>95% CL</b>  | <b>position</b> | <b>base</b> | <b>gene</b>      | <b>aa</b> | <b>notes</b> |
|----------------------------|---------------|----------------|-----------------|-------------|------------------|-----------|--------------|
| 132.9                      | 0.411         | [0.322, 0.502] | 2765159         | T→G         | <i>ygbO</i>      | E336A     |              |
| 117.7                      | 0.353         | [0.274, 0.447] | 2754688         | T→G         | <i>pphB</i>      | I23M      | C40K         |
| 115.6                      | 0.571         | [0.466, 0.661] | 2732014         | C→A         | <i>hypF</i>      | R91L      | C20K+        |
| 113.3                      | 0.500         | [0.388, 0.614] | 3650528         | A→C         | <i>cspA</i>      | I8L       | C40K         |
| 106.2                      | 0.513         | [0.390, 0.638] | 4139889         | T→G         | <i>udhA</i>      | K255Q     | C40K         |
| 104.4                      | 0.315         | [0.239, 0.401] | 2740772         | A→C         | <i>hycE</i>      | L187R     | C40K         |
| 102.0                      | 0.512         | [0.396, 0.633] | 3470129         | T→G         | <i>feoB</i>      | L353R     | C40K         |
| 98.3                       | 0.512         | [0.380, 0.635] | 3724516         | T→G         | <i>secB</i>      | N127H     | C40K         |
| 95.0                       | 0.509         | [0.378, 0.623] | 4029063         | A→C         | <i>yihA/yihI</i> | -         | C40K         |
| 91.8                       | 0.529         | [0.394, 0.655] | 3114886         | T→G         | <i>ygiC</i>      | Y98*      | C40K         |
| 88.0                       | 0.499         | [0.370, 0.631] | 4064362         | T→G         | <i>fdhD</i>      | L67R      | C40K         |
| 87.4                       | 0.555         | [0.425, 0.682] | 3507177         | A→C         | <i>gntU</i>      | S446R     | C40K         |
| 86.1                       | 0.490         | [0.366, 0.620] | 1555678         | T→G         | <i>ydeN</i>      | V266V     | C40K         |
| 85.5                       | 0.555         | [0.426, 0.678] | 3922213         | A→C         | <i>yifN</i>      | -         | C40K         |
| 85.2                       | 0.510         | [0.380, 0.637] | 4353840         | T→G         | <i>yjeK</i>      | W177G     | C40K         |
| 78.8                       | 0.529         | [0.389, 0.662] | 4570266         | T→G         | <i>hpaB</i>      | C492G     | C40K         |
| 78.0                       | 0.557         | [0.424, 0.689] | 3575750         | A→C         | <i>prlC</i>      | V41V      | C40K         |
| 77.9                       | 0.547         | [0.415, 0.687] | 2285933         | T→G         | <i>gyrA</i>      | Y63S      | C40K         |
| 77.7                       | 0.539         | [0.396, 0.674] | 2333346         | A→C         | ECB_02200        | K228Q     | C40K         |
| 77.6                       | 0.425         | [0.306, 0.547] | 3690416         | T→G         | <i>aldB</i>      | I263M     |              |
| 76.3                       | 0.531         | [0.386, 0.670] | 2858322         | A→C         | <i>ppdB</i>      | E5A       | C40K         |
| 73.6                       | 0.555         | [0.404, 0.685] | 4530188         | A→C         | <i>fimH</i>      | N156T     | C40K         |
| 72.5                       | 0.573         | [0.432, 0.703] | 816306          | A→C         | <i>ybhO</i>      | Y20S      | C40K         |
| 72.3                       | 0.509         | [0.365, 0.656] | 2489436         | T→G         | <i>eutG</i>      | L302W     | C40K         |
| 70.9                       | 0.520         | [0.375, 0.664] | 424738          | A→C         | <i>yajG</i>      | V45V      | C40K         |
| 70.8                       | 0.524         | [0.374, 0.665] | 931180          | T→G         | <i>ybjE</i>      | L129V     | C40K         |
| 70.4                       | 0.524         | [0.375, 0.665] | 1477302         | A→C         | <i>ydcP</i>      | I138L     | C40K         |
| 69.8                       | 0.523         | [0.381, 0.679] | 3716330         | C→T         | ECB_03460        | K1114Q    | C40K         |
| 68.2                       | 0.562         | [0.423, 0.702] | 3911660         | T→G         | <i>yifB</i>      | L47*      | C40K         |
| 68.1                       | 0.488         | [0.345, 0.637] | 3184072         | A→C         | <i>yqjG</i>      | I5M       | C40K         |
| 68.0                       | 0.600         | [0.458, 0.719] | 181491          | A→C         | <i>pfs</i>       | I169L     | C40K         |
| 67.9                       | 0.654         | [0.530, 0.769] | 1886192         | A→C         | <i>yobFlyebO</i> | -         | C40K         |
| 66.8                       | 0.583         | [0.441, 0.706] | 100218          | T→G         | <i>murD</i>      | I110L     | C40K         |
| 66.7                       | 0.618         | [0.483, 0.740] | 728010          | A→C         | <i>abrB</i>      | N182T     | C40K         |
| 66.1                       | 0.357         | [0.250, 0.484] | 2790674         | T→G         | <i>ygcE</i>      | D93E      | C40K         |
| 65.8                       | 0.634         | [0.495, 0.746] | 1904444         | T→G         | <i>yobB</i>      | F143L     | C40K         |
| 65.4                       | 0.559         | [0.413, 0.696] | 1642043         | A→C         | <i>ynfl</i>      | I115L     | C40K         |
| 65.4                       | 0.629         | [0.498, 0.750] | 463771          | T→G         | <i>apt</i>       | E98A      | C40K         |
| 65.3                       | 0.519         | [0.359, 0.663] | 4562591         | G→T         | <i>hsdR</i>      | T716P     | C40K         |
| 64.5                       | 0.481         | [0.340, 0.625] | 3683249         | A→C         | ECB_03437        | Y314D     | C40K         |
| 64.4                       | 0.567         | [0.422, 0.703] | 154388          | A→C         | <i>yadK</i>      | L18R      | C40K         |
| 63.7                       | 0.555         | [0.414, 0.692] | 1902841         | T→G         | <i>yebZ</i>      | L109L     | C40K         |
| 63.4                       | 0.600         | [0.458, 0.715] | 1966410         | T→G         | <i>yecR</i>      | G65G      | C40K         |
| 63.4                       | 0.496         | [0.353, 0.648] | 2441230         | T→G         | <i>ypdG</i>      | I297S     | C40K         |
| 63.2                       | 0.567         | [0.423, 0.707] | 1829798         | A→C         | <i>pncA/ydjE</i> | -         | C40K         |
| 63.1                       | 0.487         | [0.344, 0.637] | 4180045         | T→G         | <i>hupA</i>      | K51N      | C40K         |
| 62.7                       | 0.406         | [0.282, 0.536] | 2413433         | T→G         | <i>dsdA</i>      | E2A       |              |
| 62.4                       | 0.498         | [0.348, 0.651] | 4118298         | A→C         | <i>gldA</i>      | Q282P     | C40K         |
| 62.3                       | 0.537         | [0.379, 0.683] | 1975162         | T→G         | <i>yedV</i>      | K330N     | C40K         |
| 61.8                       | 0.517         | [0.365, 0.681] | 379334          | T→G         | <i>yajF</i>      | N256K     | C40K         |
| 61.8                       | 0.597         | [0.451, 0.731] | 2920951         | A→C         | <i>prfB</i>      | E362A     | C40K         |
| 60.5                       | 0.648         | [0.509, 0.766] | 1690600         | T→G         | <i>ydgR</i>      | F213C     | C40K         |
| 60.3                       | 0.618         | [0.478, 0.750] | 1634870         | T→G         | <i>ynfD</i>      | I37M      | C40K         |
| 60.0                       | 0.635         | [0.496, 0.744] | 3835234         | A→C         | <i>dgoR</i>      | S96R      | C40K         |
| 60.0                       | 0.580         | [0.423, 0.713] | 2625494         | T→G         | <i>rncS</i>      | E21A      | C40K         |
| 60.0                       | 0.479         | [0.334, 0.629] | 3187264         | T→G         | <i>yhaJ/yhaK</i> | -         | C40K         |

**Table S6 | SNPs predicted in 30K mixed-population sample**

| <b>-log<sub>10</sub> E</b> | <b>fr new</b> | <b>95% CL</b>  | <b>position</b> | <b>base</b> | <b>gene</b>      | <b>aa</b> | <b>notes</b> |
|----------------------------|---------------|----------------|-----------------|-------------|------------------|-----------|--------------|
| 59.8                       | 0.591         | [0.433, 0.724] | 1496171         | A→C         | <i>ansPlyncG</i> | -         | C40K         |
| 59.5                       | 0.551         | [0.413, 0.701] | 3976831         | A→C         | <i>metR</i>      | E138A     | C40K         |
| 59.1                       | 0.544         | [0.403, 0.700] | 243156          | G→T         | <i>yhhI</i>      | H115P     | C40K         |
| 58.3                       | 0.664         | [0.528, 0.782] | 2897800         | A→C         | <i>yqeA</i>      | I195M     | C40K         |
| 57.5                       | 0.609         | [0.463, 0.749] | 1759732         | T→G         | <i>ydiS</i>      | V357G     | C40K         |
| 57.2                       | 0.476         | [0.327, 0.631] | 4078976         | T→G         | <i>rhaR</i>      | *313Y     | C40K         |
| 56.6                       | 0.545         | [0.387, 0.699] | 1098758         | A→C         | <i>ycdO</i>      | E77D      | C40K         |
| 56.5                       | 0.410         | [0.276, 0.550] | 2480430         | A→C         | <i>amiA</i>      | Q187P     | C40K         |
| 56.2                       | 0.536         | [0.376, 0.691] | 3865067         | T→G         | <i>bgfF</i>      | F300C     | C40K         |
| 54.5                       | 0.560         | [0.421, 0.704] | 3303353         | A→C         | <i>dcuD</i>      | Y196S     | C40K         |
| 54.0                       | 0.628         | [0.472, 0.754] | 1692302         | A→C         | <i>pdxY</i>      | M261R     | C40K         |
| 53.9                       | 0.567         | [0.398, 0.716] | 2909993         | A→C         | <i>xdhDlygfO</i> | -         | C40K         |
| 53.5                       | 0.680         | [0.552, 0.798] | 3500952         | T→G         | <i>glgX</i>      | L608V     | C40K         |
| 53.4                       | 0.568         | [0.396, 0.722] | 640290          | T→G         | <i>ccbB</i>      | L77L      | C40K         |
| 53.3                       | 0.627         | [0.477, 0.747] | 4545297         | T→G         | <i>yjiL</i>      | K103Q     | C40K         |
| 53.2                       | 0.632         | [0.481, 0.760] | 1909010         | T→G         | <i>yebF/yebG</i> | -         | C40K         |
| 53.0                       | 0.519         | [0.359, 0.691] | 3521505         | T→G         | <i>ugpA</i>      | F28C      | C40K         |
| 52.8                       | 0.277         | [0.184, 0.400] | 4589980         | T→G         | <i>dnaC</i>      | E77A      |              |
| 52.4                       | 0.653         | [0.506, 0.776] | 2988792         | A→C         | <i>mutY</i>      | L40W      | C40K         |
| 52.4                       | 0.394         | [0.265, 0.540] | 2390130         | A→C         | <i>aroC</i>      | V312V     |              |
| 51.2                       | 0.489         | [0.325, 0.653] | 438423          | T→G         | <i>ybaE</i>      | Q319H     |              |
| 50.8                       | 0.502         | [0.336, 0.662] | 4332868         | A→C         | <i>lysU</i>      | I190M     | C40K         |
| 50.5                       | 0.501         | [0.335, 0.667] | 3605645         | T→G         | <i>yhjElyhjG</i> | -         | C40K         |
| 50.0                       | 0.572         | [0.410, 0.731] | 970635          | T→G         | <i>pflB</i>      | N5H       | C40K         |
| 49.9                       | 0.536         | [0.374, 0.695] | 714992          | T→G         | <i>ybfO</i>      | K343N     | C40K         |
| 49.7                       | 0.525         | [0.353, 0.702] | 411430          | A→C         | <i>thillthiJ</i> | -         | C40K         |
| 49.6                       | 0.346         | [0.230, 0.473] | 125265          | A→C         | <i>pdhR</i>      | K124Q     | C40K         |
| 48.4                       | 0.542         | [0.368, 0.709] | 1977296         | T→G         | <i>yedX</i>      | N114K     | C40K         |
| 48.2                       | 0.511         | [0.329, 0.673] | 2594074         | A→C         | <i>yphA</i>      | G34G      | C40K         |
| 47.9                       | 0.545         | [0.387, 0.700] | 4511435         | T→G         | <i>sgcX</i>      | S119A     | C40K         |
| 47.5                       | 0.453         | [0.303, 0.613] | 2387080         | A→C         | <i>yfcK</i>      | P575P     | C40K         |
| 46.8                       | 0.310         | [0.200, 0.434] | 3132740         | T→G         | <i>ygiF</i>      | K354Q     |              |
| 46.8                       | 0.543         | [0.370, 0.706] | 1518024         | A→C         | <i>narU</i>      | I63S      | C40K         |
| 46.6                       | 0.713         | [0.573, 0.820] | 3743455         | T→G         | <i>waaO</i>      | T15P      | C40K         |
| 46.3                       | 0.358         | [0.233, 0.496] | 2914781         | T→G         | <i>ygfT</i>      | D635E     |              |
| 46.3                       | 0.489         | [0.308, 0.666] | 940678          | A→C         | <i>clpA</i>      | P189L     | C40K         |
| 46.3                       | 0.551         | [0.381, 0.717] | 2422436         | A→C         | <i>yfdE</i>      | L320F     | C40K         |
| 46.1                       | 0.632         | [0.476, 0.769] | 4466019         | A→C         | <i>valS</i>      | F284L     | C40K         |
| 46.0                       | 0.679         | [0.534, 0.805] | 3824042         | A→C         | <i>glvBC</i>     | M1R       | C40K         |
| 45.9                       | 0.585         | [0.422, 0.731] | 1761548         | A→C         | <i>ydiD</i>      | D435A     | C40K         |
| 45.9                       | 0.409         | [0.265, 0.568] | 4232744         | T→G         | <i>ubiA</i>      | F266C     |              |
| 45.3                       | 0.660         | [0.504, 0.784] | 4613809         | T→G         | <i>serB</i>      | K234T     | C40K         |
| 44.4                       | 0.542         | [0.364, 0.721] | 1016770         | A→C         | <i>ycbS</i>      | I155S     | C40K         |
| 44.2                       | 0.395         | [0.257, 0.540] | 1470975         | T→G         | <i>tehA</i>      | V98V      | C40K         |
| 44.2                       | 0.345         | [0.222, 0.486] | 2831467         | T→G         | <i>fucl</i>      | Q422P     |              |
| 44.0                       | 0.430         | [0.278, 0.604] | 832307          | T→G         | <i>ybiL</i>      | E617A     |              |
| 43.9                       | 0.607         | [0.454, 0.750] | 3722953         | A→C         | <i>cysE</i>      | R126S     | C40K         |
| 43.6                       | 0.324         | [0.211, 0.461] | 946240          | T→G         | <i>cydC</i>      | L5R       |              |
| 43.1                       | 0.345         | [0.216, 0.483] | 3468806         | A→C         | <i>yhgF/feoA</i> | -         |              |
| 43.0                       | 0.321         | [0.206, 0.468] | 1411992         | T→G         | <i>recE</i>      | S855S     |              |
| 42.7                       | 0.637         | [0.469, 0.780] | 690209          | A→C         | <i>glnSlybfM</i> | -         | C40K         |
| 42.6                       | 0.324         | [0.205, 0.467] | 2366414         | A→C         | <i>yfcl</i>      | K240Q     |              |
| 42.6                       | 0.713         | [0.581, 0.826] | 10269           | T→G         | <i>yaaH</i>      | F75C      | C40K         |
| 42.2                       | 0.626         | [0.459, 0.774] | 4248845         | A→C         | <i>aphA</i>      | F167C     | C40K         |
| 42.1                       | 0.230         | [0.143, 0.340] | 2717011         | A→C         | <i>recX</i>      | N163T     |              |
| 42.1                       | 0.362         | [0.234, 0.511] | 4590702         | A→C         | <i>dnaT</i>      | V17G      |              |

**Table S6 | SNPs predicted in 30K mixed-population sample**

| <b>-log<sub>10</sub> E</b> | <b>fr new</b> | <b>95% CL</b>  | <b>position</b> | <b>base</b> | <b>gene</b>      | <b>aa</b> | <b>notes</b> |
|----------------------------|---------------|----------------|-----------------|-------------|------------------|-----------|--------------|
| 42.1                       | 0.266         | [0.168, 0.385] | 556481          | A→C         | ECB_00513        | I589S     |              |
| 41.2                       | 0.308         | [0.196, 0.455] | 1709400         | A→C         | <i>lhr</i>       | A1040A    |              |
| 41.1                       | 0.434         | [0.280, 0.619] | 383083          | A→C         | <i>sbvC</i>      | L365R     | C40K         |
| 40.7                       | 0.514         | [0.330, 0.699] | 3917503         | T→G         | <i>ilvA</i>      | F124C     | C40K         |
| 40.6                       | 0.265         | [0.158, 0.381] | 4237765         | A→C         | <i>dinF</i>      | I364M     |              |
| 40.4                       | 0.627         | [0.458, 0.775] | 918143          | A→C         | <i>artM</i>      | F33L      | C40K         |
| 40.3                       | 0.250         | [0.155, 0.374] | 1492341         | T→G         | <i>yncD</i>      | T279P     |              |
| 40.1                       | 0.669         | [0.510, 0.800] | 331559          | T→G         | <i>cynT</i>      | S69A      | C40K         |
| 40.1                       | 0.353         | [0.217, 0.496] | 3376110         | T→G         | <i>rplNlrpsQ</i> | -         |              |
| 40.1                       | 0.221         | [0.139, 0.332] | 2718856         | A→C         | <i>ygaD</i>      | V117G     |              |
| 40.1                       | 0.495         | [0.303, 0.672] | 393379          | T→G         | <i>yajBlqueA</i> | -         | C40K         |
| 39.9                       | 0.583         | [0.393, 0.746] | 1129502         | T→G         | <i>yceE</i>      | F186L     | C40K         |
| 39.7                       | 0.396         | [0.246, 0.568] | 1866742         | T→G         | <i>fadD</i>      | K528T     |              |
| 39.1                       | 0.354         | [0.219, 0.512] | 4276594         | A→C         | <i>fdhF</i>      | D532A     |              |
| 38.7                       | 0.273         | [0.163, 0.403] | 70484           | T→G         | <i>araA</i>      | S220A     |              |
| 38.5                       | 0.719         | [0.577, 0.835] | 1880102         | A→C         | <i>yoaE</i>      | I21M      | C40K         |
| 38.3                       | 0.321         | [0.200, 0.475] | 3798789         | A→C         | <i>yicL</i>      | Y204D     |              |
| 38.2                       | 0.292         | [0.182, 0.420] | 647336          | T→G         | <i>rtpA</i>      | S147A     |              |
| 38.0                       | 0.271         | [0.169, 0.400] | 428805          | A→C         | <i>clpX</i>      | Q225H     |              |
| 38.0                       | 0.281         | [0.171, 0.408] | 4600949         | A→C         | <i>osmY</i>      | K107T     |              |
| 37.9                       | 0.273         | [0.169, 0.403] | 618019          | T→G         | <i>ybdM</i>      | S19R      |              |
| 37.6                       | 0.395         | [0.241, 0.568] | 4393997         | T→G         | <i>aidB</i>      | L523W     |              |
| 37.5                       | 0.273         | [0.169, 0.403] | 3103666         | T→G         | <i>ygiW</i>      | V61V      |              |
| 37.2                       | 0.272         | [0.162, 0.402] | 3050848         | T→G         | <i>glcG</i>      | L92F      |              |
| 37.2                       | 0.296         | [0.180, 0.436] | 3868034         | A→C         | <i>pstB</i>      | S234R     |              |
| 37.2                       | 0.193         | [0.116, 0.294] | 2745079         | T→G         | <i>hycA</i>      | N73H      | C40K         |
| 37.1                       | 0.290         | [0.173, 0.422] | 416393          | T→G         | ECB_00376        | K297Q     |              |
| 37.0                       | 0.284         | [0.173, 0.414] | 1499599         | A→C         | ECB_01413        | N506H     |              |
| 36.9                       | 0.302         | [0.181, 0.444] | 2151088         | T→G         | <i>molR</i>      | Y1140D    |              |
| 36.8                       | 0.693         | [0.552, 0.810] | 1570553         | T→G         | <i>ydeU</i>      | -         | C40K         |
| 36.8                       | 0.324         | [0.191, 0.472] | 4075309         | T→G         | <i>rhaA</i>      | E54D      |              |
| 36.8                       | 0.311         | [0.189, 0.459] | 3599999         | T→G         | <i>treF</i>      | S306A     |              |
| 36.8                       | 0.733         | [0.590, 0.845] | 3962760         | T→G         | ECB_03690        | E60D      | C40K         |
| 35.7                       | 0.353         | [0.210, 0.510] | 2671929         | A→C         | <i>grpE</i>      | I25M      |              |
| 35.6                       | 0.238         | [0.141, 0.354] | 722463          | T→G         | <i>ybgH</i>      | L293L     |              |
| 35.6                       | 0.360         | [0.220, 0.523] | 77302           | A→C         | <i>thiP</i>      | L8F       |              |
| 35.5                       | 0.657         | [0.502, 0.796] | 1756840         | T→G         | <i>ydiPlydiQ</i> | -         | C40K         |
| 35.4                       | 0.364         | [0.222, 0.532] | 3617683         | T→G         | <i>bcsC</i>      | K328T     | C40K         |
| 35.4                       | 0.383         | [0.234, 0.554] | 1565184         | A→C         | ECB_01465        | F91V      |              |
| 35.3                       | 0.330         | [0.199, 0.475] | 1379205         | A→C         | <i>ycjV</i>      | L6*       |              |
| 35.1                       | 0.270         | [0.161, 0.397] | 3384606         | T→G         | <i>gspD</i>      | S109A     |              |
| 34.8                       | 0.261         | [0.158, 0.392] | 4327207         | A→C         | <i>dcuB</i>      | N85H      |              |
| 34.7                       | 0.517         | [0.312, 0.726] | 1456048         | T→G         | <i>hrpA</i>      | R1200R    | C40K         |
| 34.6                       | 0.324         | [0.190, 0.472] | 215533          | T→G         | <i>tilS</i>      | C121G     |              |
| 34.5                       | 0.244         | [0.148, 0.360] | 3102587         | T→G         | <i>ygiU</i>      | N44H      |              |
| 34.3                       | 0.213         | [0.129, 0.318] | 362643          | A→C         | <i>yaiV</i>      | N179K     |              |
| 34.1                       | 0.253         | [0.153, 0.379] | 4007617         | A→C         | <i>fadB</i>      | F576L     |              |
| 34.0                       | 0.510         | [0.313, 0.724] | 506450          | T→G         | <i>gcl</i>       | A123A     | C40K         |
| 33.5                       | 0.304         | [0.176, 0.446] | 4461911         | A→C         | <i>yjgD</i>      | K103Q     |              |
| 33.3                       | 0.376         | [0.225, 0.554] | 1794984         | T→G         | <i>celF</i>      | Y261S     | C40K         |
| 33.1                       | 0.740         | [0.597, 0.854] | 582155          | T→G         | <i>cusA</i>      | K847Q     | C40K         |
| 33.1                       | 0.272         | [0.161, 0.411] | 4210330         | T→G         | <i>yjdB</i>      | F78C      |              |
| 33.0                       | 0.293         | [0.174, 0.450] | 1709960         | A→C         | <i>lhr</i>       | V1227G    |              |
| 32.8                       | 0.266         | [0.155, 0.386] | 2347515         | A→C         | <i>nuoC/nuoB</i> | -         |              |
| 32.6                       | 0.291         | [0.169, 0.441] | 1878335         | T→G         | <i>yoaD</i>      | T444P     |              |
| 32.4                       | 0.263         | [0.159, 0.403] | 1331374         | T→G         | <i>topA</i>      | E652A     |              |

**Table S6 | SNPs predicted in 30K mixed-population sample**

| <b>-log<sub>10</sub> E</b> | <b>fr new</b> | <b>95% CL</b>  | <b>position</b> | <b>base</b> | <b>gene</b>      | <b>aa</b> | <b>notes</b> |
|----------------------------|---------------|----------------|-----------------|-------------|------------------|-----------|--------------|
| 32.1                       | 0.240         | [0.142, 0.367] | 3411939         | C→A         | <i>yheT</i>      | K278T     |              |
| 32.1                       | 0.304         | [0.175, 0.452] | 3535529         | T→G         | <i>yhhF</i>      | D150A     |              |
| 32.0                       | 0.303         | [0.176, 0.458] | 3857041         | A→C         | <i>yieGlyieH</i> | -         |              |
| 31.5                       | 0.266         | [0.158, 0.403] | 1446984         | A→C         | <i>ynbA</i>      | F10L      |              |
| 31.3                       | 0.247         | [0.144, 0.373] | 2317599         | A→C         | <i>arnT</i>      | E60A      |              |
| 31.1                       | 0.242         | [0.142, 0.368] | 3823424         | A→C         | <i>glvBC</i>     | F207C     |              |
| 31.0                       | 0.294         | [0.172, 0.450] | 2300176         | A→C         | <i>glpA</i>      | D274E     |              |
| 31.0                       | 0.360         | [0.206, 0.537] | 516413          | A→C         | <i>allC</i>      | Y349S     | C40K         |
| 30.9                       | 0.221         | [0.122, 0.341] | 2305044         | T→G         | <i>yfaU</i>      | A105A     |              |
| 30.7                       | 0.265         | [0.155, 0.402] | 4228591         | T→G         | <i>malM</i>      | S36R      |              |
| 30.6                       | 0.241         | [0.138, 0.362] | 4171476         | A→C         | <i>thiH</i>      | K2Q       |              |
| 30.5                       | 0.684         | [0.502, 0.826] | 1171882         | A→C         | <i>ycfH</i>      | I179M     | C40K         |
| 30.5                       | 0.243         | [0.141, 0.378] | 3285688         | T→G         | <i>yhbL</i>      | K3Q       |              |
| 30.3                       | 0.310         | [0.186, 0.464] | 3588297         | A→C         | <i>yhiE</i>      | L147F     |              |
| 30.1                       | 0.312         | [0.182, 0.467] | 3544287         | T→G         | <i>acpT/NIK</i>  | -         |              |
| 29.6                       | 0.303         | [0.178, 0.454] | 313193          | A→C         | <i>yahl</i>      | H127P     |              |
| 29.6                       | 0.250         | [0.141, 0.378] | 1351809         | A→C         | <i>sapD</i>      | V63V      |              |
| 29.6                       | 0.255         | [0.144, 0.389] | 1563353         | A→C         | <i>ydeT</i>      | G200G     |              |
| 29.0                       | 0.301         | [0.178, 0.458] | 1539798         | T→G         | <i>yddV</i>      | G314G     |              |
| 29.0                       | 0.267         | [0.148, 0.396] | 2686373         | A→C         | <i>gabD</i>      | I141L     |              |
| 28.9                       | 0.237         | [0.133, 0.365] | 2360207         | A→C         | <i>pta</i>       | G623G     |              |
| 28.9                       | 0.257         | [0.144, 0.397] | 4075029         | T→G         | <i>rhaA</i>      | T148P     | C40K         |
| 28.6                       | 0.282         | [0.155, 0.448] | 2245963         | T→G         | <i>ccmC</i>      | K116T     |              |
| 28.3                       | 0.231         | [0.130, 0.364] | 4321344         | A→C         | <i>melA</i>      | I240M     |              |
| 28.1                       | 0.377         | [0.211, 0.564] | 14120           | T→G         | <i>dnaK/dnaJ</i> | -         |              |
| 27.9                       | 0.271         | [0.156, 0.410] | 1064164         | T→G         | <i>ymcA</i>      | A291A     |              |
| 27.9                       | 0.309         | [0.173, 0.471] | 17424           | A→C         | <i>mokC/nhaA</i> | -         |              |
| 27.4                       | 0.683         | [0.504, 0.822] | 4180803         | A→C         | <i>yjaH</i>      | E209A     | C40K         |
| 26.6                       | 0.305         | [0.166, 0.465] | 3574148         | T→G         | <i>prlC</i>      | E575D     |              |
| 26.5                       | 0.443         | [0.255, 0.648] | 3252768         | T→G         | <i>nusA/yhbC</i> | -         | C40K         |
| 26.4                       | 0.212         | [0.120, 0.342] | 3271498         | A→C         | <i>murA</i>      | N78H      |              |
| 26.3                       | 0.693         | [0.531, 0.842] | 3859873         | T→G         | <i>yieL</i>      | K367N     | C40K         |
| 26.3                       | 0.259         | [0.142, 0.402] | 3170823         | A→C         | <i>ygjR</i>      | S238R     |              |
| 26.0                       | 0.559         | [0.322, 0.756] | 3561248         | A→C         | <i>yhil</i>      | L15V      | C40K         |
| 25.7                       | 0.274         | [0.150, 0.428] | 3290558         | A→C         | <i>gltB</i>      | L231R     |              |
| 25.6                       | 0.187         | [0.102, 0.297] | 4498963         | A→C         | <i>fecB</i>      | L126L     |              |
| 25.5                       | 0.196         | [0.107, 0.308] | 3982571         | T→G         | ECB_03712        | I312L     |              |
| 25.4                       | 0.216         | [0.115, 0.345] | 3105335         | T→G         | <i>ygiY</i>      | F227C     |              |
| 25.4                       | 0.410         | [0.223, 0.613] | 4339028         | T→G         | <i>cadB/cadC</i> | -         |              |
| 25.4                       | 0.313         | [0.172, 0.471] | 504190          | A→C         | <i>ybbS</i>      | L66L      |              |
| 25.1                       | 0.242         | [0.136, 0.382] | 3174613         | T→G         | <i>ygjV</i>      | S56R      |              |
| 24.9                       | 0.340         | [0.185, 0.532] | 1712380         | A→C         | <i>ydhO</i>      | E251A     |              |
| 24.8                       | 0.323         | [0.179, 0.520] | 3739217         | T→G         | <i>waaW</i>      | E250A     |              |
| 24.5                       | 0.378         | [0.208, 0.578] | 332980          | T→G         | <i>cynX</i>      | W145G     | C40K         |
| 24.4                       | 0.233         | [0.125, 0.369] | 683151          | T→G         | <i>nagC</i>      | E180A     |              |
| 24.4                       | 0.375         | [0.210, 0.562] | 635217          | T→G         | <i>citA</i>      | E132A     | C40K         |
| 24.3                       | 0.195         | [0.102, 0.313] | 3816401         | T→G         | <i>yidI</i>      | I19L      |              |
| 24.3                       | 0.194         | [0.104, 0.314] | 11293           | T→G         | <i>yaaW</i>      | Q21P      |              |
| 24.2                       | 0.294         | [0.154, 0.460] | 2423302         | T→G         | <i>yfdE</i>      | C32G      |              |
| 23.8                       | 0.297         | [0.161, 0.455] | 3256963         | A→C         | <i>yhbX/leuU</i> | -         |              |
| 23.6                       | 0.231         | [0.124, 0.368] | 1682683         | T→G         | <i>ydgK</i>      | F80L      |              |
| 23.4                       | 0.301         | [0.160, 0.480] | 1087245         | A→C         | <i>ycdI/ycdJ</i> | -         |              |
| 23.3                       | 0.324         | [0.174, 0.506] | 1426046         | T→G         | <i>ynaE/ynaF</i> | -         |              |
| 23.1                       | 0.277         | [0.146, 0.440] | 1805515         | A→C         | <i>astB</i>      | W4G       |              |
| 22.9                       | 0.174         | [0.090, 0.290] | 3668933         | T→G         | <i>malS</i>      | Y327*     |              |
| 22.7                       | 0.290         | [0.152, 0.460] | 2235494         | T→G         | <i>yejL</i>      | S60A      |              |

**Table S6 | SNPs predicted in 30K mixed-population sample**

| <b>-log<sub>10</sub> E</b> | <b>fr new</b> | <b>95% CL</b>  | <b>position</b> | <b>base</b> | <b>gene</b>               | <b>aa</b> | <b>notes</b> |
|----------------------------|---------------|----------------|-----------------|-------------|---------------------------|-----------|--------------|
| 22.7                       | 0.363         | [0.183, 0.561] | 2864911         | T→G         | <i>mutH</i>               | G210G     | C40K         |
| 22.6                       | 0.339         | [0.173, 0.529] | 4081971         | T→G         | <i>kdgT</i>               | V267G     |              |
| 22.5                       | 0.237         | [0.121, 0.373] | 4380214         | A→C         | <i>hflK</i>               | N8H       |              |
| 22.1                       | 0.289         | [0.151, 0.475] | 1686279         | A→C         | <i>rnfC</i>               | I723L     |              |
| 21.5                       | 0.174         | [0.091, 0.292] | 293270          | A→C         | <i>ykgD</i>               | Q132P     |              |
| 21.0                       | 0.307         | [0.164, 0.481] | 460893          | T→G         | <i>kefA</i>               | N764T     |              |
| 20.7                       | 0.244         | [0.127, 0.412] | 2122404         | A→C         | ECB_02012/<br>ECB_02013   | -         |              |
| 20.6                       | 0.207         | [0.111, 0.348] | 3648741         | A→C         | <i>tkrA</i>               | *325S     |              |
| 20.6                       | 0.244         | [0.126, 0.388] | 970292          | T→G         | <i>pflB</i>               | I119S     |              |
| 20.2                       | 0.700         | [0.520, 0.841] | 4096930         | A→C         | <i>glpF</i>               | W215G     | C40K         |
| 19.9                       | 0.296         | [0.151, 0.475] | 546221          | A→C         | <i>ybcQ</i>               | S126A     |              |
| 19.8                       | 0.286         | [0.142, 0.453] | 787877          | A→C         | <i>ybhC</i> /ECB_00726    | -         |              |
| 19.5                       | 0.203         | [0.103, 0.344] | 1280359         | A→C         | <i>narG</i>               | K116Q     |              |
| 19.3                       | 0.237         | [0.122, 0.380] | 4054046         | A→C         | <i>yihX</i>               | F116C     |              |
| 19.1                       | 0.217         | [0.111, 0.371] | 4506667         | T→G         | <i>sgcR</i>               | V120V     |              |
| 18.7                       | 0.269         | [0.133, 0.432] | 1536376         | A→C         | <i>yddS</i>               | V15G      |              |
| 18.3                       | 0.314         | [0.153, 0.509] | 3498552         | T→G         | <i>glgA</i>               | E312D     |              |
| 18.2                       | 0.167         | [0.086, 0.294] | 763784          | A→C         | <i>nadA</i> / <i>pnuC</i> | -         |              |
| 18.0                       | 0.236         | [0.121, 0.381] | 3152187         | T→G         | <i>aerlygjG</i>           | -         |              |
| 18.0                       | 0.236         | [0.117, 0.413] | 1112671         | A→C         | <i>ycdW</i>               | K73Q      |              |
| 17.6                       | 0.189         | [0.104, 0.330] | 3734087         | T→G         | <i>gumD</i>               | F186C     |              |
| 17.5                       | 0.504         | [0.260, 0.741] | 3027011         | T→G         | ECB_02827                 | *220Y     | C40K         |
| 17.5                       | 0.290         | [0.142, 0.481] | 3495488         | T→G         | <i>yzgI</i> / <i>glgP</i> | -         |              |
| 17.2                       | 0.201         | [0.094, 0.339] | 456451          | A→C         | <i>acrB</i>               | D7A       |              |
| 16.6                       | 0.185         | [0.085, 0.315] | 3768014         | A→C         | <i>yicE</i>               | N10H      |              |
| 16.5                       | 0.215         | [0.110, 0.369] | 2901848         | A→C         | <i>ygfK</i>               | E12A      |              |
| 16.3                       | 0.182         | [0.091, 0.309] | 1953919         | A→C         | <i>cheA</i>               | F59C      |              |
| 16.3                       | 0.376         | [0.183, 0.594] | 4089472         | A→C         | <i>cdh</i>                | I21L      | C40K         |
| 16.2                       | 0.211         | [0.100, 0.361] | 1072719         | T→G         | <i>torT</i>               | S57A      |              |
| 15.5                       | 0.238         | [0.108, 0.413] | 117940          | A→C         | <i>hofC</i>               | T197P     |              |
| 15.1                       | 0.216         | [0.106, 0.358] | 4426361         | T→G         | <i>ytfM</i>               | Y75D      |              |
| 14.8                       | 0.877         | [0.769, 0.945] | 4225047         | T→G         | <i>malE</i>               | L102W     | M40K C40K    |
| 14.8                       | 0.148         | [0.070, 0.266] | 2795703         | T→G         | <i>eno</i>                | A389A     |              |
| 14.6                       | 0.394         | [0.191, 0.641] | 1107473         | T→G         | <i>ycdS</i>               | Y368D     |              |
| 13.9                       | 0.202         | [0.090, 0.357] | 733780          | T→G         | <i>ybgD</i> / <i>glgA</i> | -         |              |
| 13.8                       | 0.886         | [0.786, 0.952] | 3857359         | A→C         | <i>yieH</i>               | Y75D      | M40K C40K    |
| 13.5                       | 0.168         | [0.079, 0.294] | 4000813         | A→C         | <i>tatB</i>               | L42R      |              |
| 13.4                       | 0.149         | [0.064, 0.270] | 3334254         | A→C         | <i>accC</i>               | A149A     |              |
| 13.4                       | 0.156         | [0.071, 0.290] | 671725          | T→G         | <i>Int</i>                | K418Q     |              |
| 12.7                       | 0.212         | [0.088, 0.399] | 2852765         | T→G         | <i>ptr</i>                | M247L     |              |
| 12.6                       | 0.247         | [0.104, 0.436] | 1234875         | T→G         | <i>nhaB</i> / <i>fadR</i> | -         |              |
| 11.8                       | 0.217         | [0.099, 0.383] | 3983415         | A→C         | ECB_03712                 | V30V      |              |
| 11.7                       | 0.212         | [0.090, 0.390] | 406765          | A→C         | <i>dxs</i>                | E612A     |              |
| 11.5                       | 0.158         | [0.069, 0.295] | 1318784         | A→C         | <i>trpD</i>               | G65G      |              |
| 11.3                       | 0.258         | [0.105, 0.475] | 825819          | A→C         | <i>dinG</i>               | L42R      |              |
| 11.1                       | 0.181         | [0.075, 0.335] | 1992277         | T→G         | <i>shiA</i>               | A212A     |              |
| 11.0                       | 0.182         | [0.078, 0.343] | 2240388         | T→G         | <i>yejO</i> / <i>narP</i> | -         |              |
| 11.0                       | 0.894         | [0.779, 0.955] | 2520902         | A→C         | <i>gcvR</i>               | S57A      | M40K C40K    |
| 10.3                       | 0.128         | [0.052, 0.245] | 687583          | T→G         | <i>nagE</i>               | V515V     |              |
| 9.8                        | 0.284         | [0.113, 0.523] | 3117354         | A→C         | <i>ygiE</i>               | I211M     |              |
| 9.1                        | 0.126         | [0.051, 0.240] | 3832123         | T→G         | <i>dgoT</i> / <i>dgoD</i> | -         |              |
| 9.0                        | 0.169         | [0.064, 0.336] | 3624614         | T→G         | <i>yhjO</i>               | F39V      |              |
| 8.9                        | 0.211         | [0.083, 0.410] | 1011700         | A→C         | <i>ssuC</i>               | I75S      |              |
| 8.5                        | 0.164         | [0.062, 0.321] | 4071050         | T→G         | <i>frvA</i> /ECB_03786    | -         |              |
| 8.3                        | 0.158         | [0.065, 0.299] | 1921636         | T→G         | <i>znuC</i>               | R133R     |              |
| 8.2                        | 0.894         | [0.775, 0.960] | 2853864         | A→C         | <i>recC</i>               | S1062A    | M40K C40K    |



**Table S6 | SNPs predicted in 30K mixed-population sample**

| <b>-log<sub>10</sub> E</b> | <b>fr new</b> | <b>95% CL</b>  | <b>position</b> | <b>base</b> | <b>gene</b>             | <b>aa</b> | <b>notes</b> |
|----------------------------|---------------|----------------|-----------------|-------------|-------------------------|-----------|--------------|
| 8.1                        | 0.283         | [0.115, 0.495] | 1379337         | A→C         | <i>ycjV</i>             | I50S      |              |
| 8.0                        | 0.114         | [0.043, 0.230] | 3514291         | T→G         | <i>yhhZ</i>             | K326Q     |              |
| 8.0                        | 0.128         | [0.053, 0.249] | 3012650         | A→C         | ECB_02814               | M112L     |              |
| 7.7                        | 0.103         | [0.040, 0.199] | 2572876         | A→C         | <i>yfhM</i>             | L77L      |              |
| 7.7                        | 0.567         | [0.199, 0.880] | 3397902         | A→C         | <i>chiA/tuf</i>         | –         |              |
| 7.7                        | 0.113         | [0.042, 0.230] | 1886123         | T→G         | <i>yobF</i>             | V16V      |              |
| 7.6                        | 0.177         | [0.065, 0.337] | 1590239         | T→G         | <i>ydeE</i>             | L381*     |              |
| 7.4                        | 0.145         | [0.057, 0.267] | 542707          | T→G         | <i>ybcKlybcL</i>        | –         |              |
| 7.2                        | 0.062         | [0.025, 0.128] | 2737645         | T→G         | <i>hycl</i>             | M87L      |              |
| 7.2                        | 0.909         | [0.798, 0.971] | 3006683         | T→G         | <i>yafZ</i>             | G231G     | M40K C40K    |
| 7.0                        | 0.175         | [0.056, 0.380] | 1046680         | A→C         | <i>yccW</i>             | Q98H      |              |
| 6.9                        | 0.136         | [0.048, 0.271] | 2397100         | A→C         | <i>yfcTU</i>            | G522G     |              |
| 6.0                        | 0.904         | [0.788, 0.970] | 4163173         | A→C         | <i>rpoB</i>             | L773R     | M40K C40K    |
| 5.9                        | 0.096         | [0.033, 0.214] | 2810544         | A→C         | <i>gudP</i>             | A162A     |              |
| 5.6                        | 0.091         | [0.031, 0.191] | 1091376         | G→A         | <i>putA</i>             | Q1264P    |              |
| 5.0                        | 0.211         | [0.069, 0.422] | 3922668         | T→G         | <i>rep</i>              | K64Q      |              |
| 4.9                        | 0.073         | [0.025, 0.168] | 4215197         | A→C         | <i>yjbF</i>             | K2Q       |              |
| 4.6                        | 0.095         | [0.033, 0.215] | 835404          | T→G         | <i>ybiN</i>             | N150H     |              |
| 4.5                        | 0.077         | [0.025, 0.168] | 3199372         | A→C         | <i>tdcA</i>             | L243*     |              |
| 4.2                        | 0.073         | [0.025, 0.168] | 2258388         | A→C         | <i>yojI</i>             | L111*     |              |
| 4.1                        | 0.071         | [0.023, 0.159] | 3066786         | T→G         | <i>yghR</i>             | M172L     |              |
| 4.0                        | 0.924         | [0.813, 0.980] | 156770          | A→C         | <i>htrE</i>             | S501A     | M40K C40K    |
| 4.0                        | 0.075         | [0.025, 0.168] | 4227537         | A→C         | <i>lamB</i>             | L212*     |              |
| 4.0                        | 0.936         | [0.843, 0.983] | 2870517         | T→G         | <i>aas</i>              | I40L      | M40K C40K    |
| 3.7                        | 0.129         | [0.036, 0.298] | 3313333         | T→G         | <i>argR/lyhcN</i>       | –         |              |
| 3.7                        | 0.080         | [0.027, 0.182] | 1473854         | A→C         | <i>ydcM</i>             | F30V      |              |
| 3.5                        | 0.104         | [0.029, 0.248] | 538077          | T→G         | <i>intD</i>             | R6R       |              |
| 3.4                        | 0.105         | [0.030, 0.254] | 1700237         | A→C         | <i>ydhK</i>             | Y308S     |              |
| 3.3                        | 0.178         | [0.052, 0.404] | 4268795         | A→C         | <i>nrfC</i>             | S19R      |              |
| 3.1                        | 0.087         | [0.024, 0.209] | 517246          | T→G         | <i>allC</i>             | Y71*      |              |
| 2.9                        | 0.072         | [0.018, 0.180] | 2022902         | A→C         | <i>hisC</i>             | F168C     |              |
| 2.8                        | 0.069         | [0.019, 0.168] | 4126750         | T→G         | <i>pflC</i>             | L129*     |              |
| 2.7                        | 0.076         | [0.022, 0.186] | 3966663         | T→G         | ECB_03695               | L9L       |              |
| 2.6                        | 0.100         | [0.028, 0.242] | 3046358         | T→G         | <i>yghJlyghK</i>        | –         |              |
| 2.6                        | 0.065         | [0.018, 0.149] | 3422569         | A→C         | <i>nirB</i>             | V218V     |              |
| 2.6                        | 0.071         | [0.019, 0.179] | 2478622         | A→C         | <i>yfeY/yfeZ</i>        | –         |              |
| 2.6                        | 0.080         | [0.019, 0.201] | 1126492         | A→C         | <i>mdoH</i>             | D354A     |              |
| 2.5                        | 0.060         | [0.017, 0.139] | 2391434         | A→C         | <i>yfcB</i>             | Q200P     |              |
| 2.5                        | 0.060         | [0.016, 0.144] | 2147344         | A→C         | <i>metG</i>             | I616M     |              |
| 2.3                        | 0.070         | [0.018, 0.170] | 3817133         | T→G         | <i>yidJ</i>             | Y402D     |              |
| 2.3                        | 0.051         | [0.014, 0.133] | 3591837         | A→C         | <i>yhiV</i>             | I645L     |              |
| 2.3                        | 0.071         | [0.019, 0.165] | 449976          | A→C         | <i>ylaB</i>             | K237Q     |              |
| 2.2                        | 0.057         | [0.018, 0.130] | 3771357         | A→C         | <i>yicl</i>             | V741V     |              |
| 2.2                        | 0.065         | [0.018, 0.166] | 2635904         | A→C         | <i>srmB/lyfiE</i>       | –         |              |
| 2.1                        | 0.079         | [0.021, 0.180] | 3796133         | A→C         | ECB_03540/<br>ECB_03541 | –         |              |
| 2.0                        | 0.075         | [0.021, 0.180] | 4342200         | T→G         | <i>dsbD</i>             | K522Q     |              |
| 2.0                        | 0.061         | [0.018, 0.153] | 3044208         | T→G         | <i>yghJ</i>             | K599T     |              |
| 2.0                        | 0.893         | [0.699, 0.977] | 2201029         | T→G         | <i>yeiH</i>             | V25V      | M40K C40K    |
| 1.9                        | 0.938         | [0.822, 0.988] | 2290343         | A→C         | <i>yfaL</i>             | Y176S     | M40K C40K    |
| 1.7                        | 0.059         | [0.016, 0.142] | 4357807         | A→C         | <i>frdD</i>             | K91Q      |              |
| 1.7                        | 0.053         | [0.015, 0.137] | 1822917         | T→G         | <i>topB</i>             | V424V     |              |
| 1.7                        | 0.906         | [0.750, 0.981] | 2937857         | T→G         | <i>visC</i>             | L71R      | M40K C40K    |
| 1.6                        | 0.077         | [0.022, 0.188] | 4281477         | A→C         | <i>yjcQ</i>             | F142V     |              |
| 1.5                        | 0.931         | [0.830, 0.982] | 3822363         | A→C         | <i>glvG</i>             | M22R      | M40K C40K    |
| 1.1                        | 0.066         | [0.014, 0.183] | 2954535         | C→A         | <i>yggA</i>             | L9F       |              |
| 1.0                        | 0.929         | [0.797, 0.985] | 1525072         | A→C         | <i>fdnH</i>             | D154E     | M40K C40K    |

**Table S6 | SNPs predicted in 30K mixed-population sample**

| <b>-log<sub>10</sub> E</b> | <b>fr new</b> | <b>95% CL</b>  | <b>position</b> | <b>base</b> | <b>gene</b>      | <b>aa</b> | <b>notes</b> |
|----------------------------|---------------|----------------|-----------------|-------------|------------------|-----------|--------------|
| 0.9                        | 0.066         | [0.017, 0.150] | 1817611         | A→C         | <i>ynjE</i>      | Q306P     |              |
| 0.8                        | 0.047         | [0.008, 0.117] | 18348           | A→C         | <i>nhaA</i>      | I287M     |              |
| 0.7                        | 0.061         | [0.017, 0.150] | 4509167         | A→C         | <i>sgcC</i>      | I405M     |              |
| 0.7                        | 0.939         | [0.828, 0.988] | 3781398         | T→G         | ECB_03521        | L21L      | M40K C40K    |
| 0.7                        | 0.067         | [0.014, 0.187] | 1831257         | T→G         | <i>ydjE/ydjF</i> | –         |              |
| 0.7                        | 0.912         | [0.758, 0.983] | 1834004         | T→G         | <i>ydjH</i>      | S52A      | M40K C40K    |
| 0.5                        | 0.077         | [0.015, 0.218] | 885973          | T→G         | ECB_00825        | I28L      |              |
| 0.5                        | 0.067         | [0.017, 0.173] | 1650331         | T→G         | <i>ydgE</i>      | E5A       |              |
| 0.4                        | 0.074         | [0.019, 0.186] | 2951405         | T→G         | <i>ygfH</i>      | S285A     |              |
| 0.4                        | 0.071         | [0.015, 0.196] | 2163878         | A→C         | <i>yehT</i>      | H94Q      |              |
| 0.4                        | 0.055         | [0.011, 0.151] | 1991993         | T→G         | <i>shiA</i>      | S118A     |              |
| 0.3                        | 0.057         | [0.011, 0.159] | 2373344         | A→C         | <i>purF</i>      | L163V     |              |
| 0.3                        | 0.059         | [0.013, 0.175] | 1172273         | A→C         | <i>ycfH/ptsG</i> | –         |              |
| 0.3                        | 0.064         | [0.013, 0.169] | 2207366         | T→G         | <i>yeiM</i>      | E386A     |              |
| 0.3                        | 0.062         | [0.016, 0.151] | 96840           | A→C         | <i>murE</i>      | S291R     |              |
| 0.3                        | 0.117         | [0.026, 0.313] | 4210659         | T→G         | <i>yjbD/lysC</i> | –         |              |
| 0.2                        | 0.055         | [0.011, 0.154] | 929203          | T→G         | <i>hcp</i>       | K440T     |              |
| 0.2                        | 0.054         | [0.012, 0.154] | 4065369         | A→C         | <i>yiiG</i>      | F74C      |              |
| 0.2                        | 0.059         | [0.013, 0.166] | 3201051         | A→C         | <i>yhaB</i>      | E55A      |              |
| 0.2                        | 0.060         | [0.012, 0.163] | 4134580         | A→C         | <i>argE</i>      | F43L      |              |
| 0.2                        | 0.050         | [0.011, 0.146] | 3684364         | A→C         | ECB_03438        | Q215P     |              |
| 0.1                        | 0.074         | [0.015, 0.191] | 1212577         | A→C         | <i>ycgW/ycgX</i> | –         |              |
| 0.1                        | 0.050         | [0.011, 0.139] | 70783           | A→C         | <i>araA</i>      | F120C     |              |
| 0.1                        | 0.054         | [0.014, 0.138] | 3933148         | T→G         | <i>wecC</i>      | I30S      |              |
| 0.1                        | 0.065         | [0.014, 0.184] | 1224269         | A→C         | <i>ycgI/minE</i> | –         |              |
| 0.1                        | 0.048         | [0.008, 0.132] | 3364013         | T→G         | <i>rrmB</i>      | Q301P     |              |
| 0.1                        | 0.050         | [0.009, 0.132] | 3039159         | T→G         | <i>yghF</i>      | I232M     |              |
| 0.1                        | 0.049         | [0.010, 0.133] | 1575930         | A→C         | <i>uxaB</i>      | V432V     |              |

**Table S7 | SNPs predicted in 40K mixed-population sample**

| <b>-log<sub>10</sub> E</b> | <b>fr new</b> | <b>95% CL</b>  | <b>position</b> | <b>base</b> | <b>gene</b>      | <b>aa</b> | <b>notes</b> |
|----------------------------|---------------|----------------|-----------------|-------------|------------------|-----------|--------------|
| 148.2                      | 0.543         | [0.444, 0.641] | 3766861         | A→C         | <i>gltS</i>      | L283V     |              |
| 142.4                      | 0.439         | [0.343, 0.531] | 2732014         | C→A         | <i>hypF</i>      | R91L      | C20K+        |
| 141.3                      | 0.550         | [0.453, 0.651] | 3848250         | A→C         | <i>trmE</i>      | L354F     |              |
| 125.6                      | 0.543         | [0.442, 0.653] | 3643009         | A→C         | <i>yhjY</i>      | T128T     |              |
| 121.6                      | 0.485         | [0.381, 0.589] | 4038134         | T→G         | <i>bipA</i>      | S490S     | C40K         |
| 117.5                      | 0.485         | [0.380, 0.590] | 301762          | A→C         | <i>betI</i>      | N74K      | C40K         |
| 116.6                      | 0.522         | [0.403, 0.633] | 1476673         | A→C         | <i>ydcN</i>      | Q131P     |              |
| 116.5                      | 0.515         | [0.399, 0.627] | 1051540         | A→C         | <i>hyaB</i>      | K399T     |              |
| 115.5                      | 0.551         | [0.436, 0.657] | 3635650         | T→G         | <i>dppB</i>      | D200A     |              |
| 115.1                      | 0.579         | [0.473, 0.676] | 70484           | A→C         | <i>araA</i>      | S220A     |              |
| 114.7                      | 0.520         | [0.404, 0.634] | 1470975         | T→G         | <i>tehA</i>      | V98V      | C40K         |
| 114.6                      | 0.527         | [0.410, 0.639] | 2482625         | T→G         | <i>yfeG</i>      | K26T      |              |
| 114.5                      | 0.649         | [0.556, 0.740] | 3985016         | T→G         | ECB_03714        | N460H     |              |
| 113.5                      | 0.507         | [0.395, 0.632] | 1342163         | A→C         | <i>yciT</i>      | D185E     | C40K         |
| 111.8                      | 0.528         | [0.410, 0.641] | 274893          | T→G         | <i>yagV</i>      | T165T     |              |
| 111.5                      | 0.477         | [0.370, 0.587] | 2745079         | T→G         | <i>hycA</i>      | N73H      | C40K         |
| 110.7                      | 0.548         | [0.429, 0.657] | 2717011         | T→G         | <i>recX</i>      | N163T     |              |
| 110.5                      | 0.510         | [0.387, 0.626] | 4328586         | A→C         | <i>dcuR</i>      | L55R      |              |
| 110.2                      | 0.436         | [0.337, 0.538] | 2391445         | T→G         | <i>yfcB</i>      | L196F     |              |
| 110.1                      | 0.532         | [0.417, 0.641] | 3622487         | A→C         | <i>yhjO</i>      | L748V     |              |
| 109.9                      | 0.574         | [0.465, 0.680] | 3559403         | A→C         | <i>yhiH</i>      | I275S     |              |
| 109.1                      | 0.465         | [0.363, 0.574] | 2733684         | A→C         | <i>ascG</i>      | L148L     |              |
| 108.4                      | 0.537         | [0.415, 0.652] | 3950156         | T→G         | <i>hemX</i>      | Q247H     |              |
| 108.2                      | 0.501         | [0.388, 0.613] | 1570155         | T→G         | <i>ydeU</i>      | -         |              |
| 108.2                      | 0.571         | [0.459, 0.677] | 150410          | T→G         | <i>yadD</i>      | Y214D     |              |
| 107.8                      | 0.508         | [0.386, 0.629] | 608267          | T→G         | <i>entC</i>      | D225E     |              |
| 107.5                      | 0.445         | [0.346, 0.553] | 2754688         | T→G         | <i>pphB</i>      | I23M      | C40K         |
| 107.3                      | 0.527         | [0.407, 0.645] | 750766          | T→G         | <i>ybgG</i>      | F636C     |              |
| 107.2                      | 0.518         | [0.393, 0.634] | 4178224         | T→G         | <i>hemE</i>      | A299A     |              |
| 106.7                      | 0.542         | [0.422, 0.655] | 835063          | T→G         | <i>ybiN</i>      | L36R      |              |
| 106.7                      | 0.512         | [0.394, 0.633] | 779376          | T→G         | <i>ybhE</i>      | V54V      |              |
| 106.7                      | 0.476         | [0.368, 0.588] | 3413924         | T→G         | <i>yhfA/crp</i>  | -         |              |
| 105.7                      | 0.483         | [0.368, 0.588] | 1202149         | A→C         | <i>pepT</i>      | E312D     |              |
| 105.6                      | 0.457         | [0.348, 0.571] | 2657995         | T→C         | <i>yfiO</i>      | S148P     | C40K         |
| 105.1                      | 0.487         | [0.373, 0.603] | 1925689         | A→C         | <i>ruvC</i>      | V153G     |              |
| 105.1                      | 0.500         | [0.386, 0.614] | 1452976         | T→G         | <i>hrpA</i>      | I176M     |              |
| 104.8                      | 0.533         | [0.416, 0.649] | 3683129         | T→G         | ECB_03437        | L274V     |              |
| 104.2                      | 0.501         | [0.390, 0.624] | 4196615         | A→C         | <i>aceA</i>      | E21A      |              |
| 104.1                      | 0.495         | [0.376, 0.601] | 3985191         | A→C         | ECB_03714        | D401E     |              |
| 103.9                      | 0.499         | [0.380, 0.610] | 4353481         | A→C         | <i>yjeK</i>      | F296L     |              |
| 103.8                      | 0.594         | [0.475, 0.688] | 2581846         | T→G         | <i>iscS</i>      | N129H     |              |
| 103.3                      | 0.392         | [0.288, 0.497] | 2083757         | G→T         | <i>yegl</i>      | H137N     | C40K         |
| 103.2                      | 0.514         | [0.390, 0.639] | 2667587         | T→G         | <i>rpsP</i>      | V2V       |              |
| 102.8                      | 0.547         | [0.429, 0.657] | 4313364         | T→G         | <i>yjdB</i>      | Q314P     |              |
| 102.3                      | 0.465         | [0.359, 0.583] | 3955552         | T→G         | <i>cyaA/cyaY</i> | -         | C40K         |
| 102.0                      | 0.579         | [0.465, 0.690] | 4178271         | T→G         | <i>hemE</i>      | F315C     |              |
| 101.9                      | 0.512         | [0.389, 0.640] | 2637769         | T→G         | <i>yfiD</i>      | P58P      |              |
| 101.8                      | 0.501         | [0.380, 0.609] | 2333346         | A→C         | ECB_02200        | K228Q     | C40K         |
| 101.0                      | 0.466         | [0.355, 0.592] | 4448669         | G→T         | <i>treB</i>      | P263P     | C40K         |
| 101.0                      | 0.513         | [0.383, 0.632] | 3382408         | A→C         | <i>gspA</i>      | L299*     |              |
| 100.7                      | 0.547         | [0.421, 0.658] | 2151897         | A→C         | <i>yehI</i>      | V141V     |              |
| 100.2                      | 0.587         | [0.467, 0.693] | 788462          | T→G         | ECB_00726        | K187N     |              |
| 100.1                      | 0.508         | [0.385, 0.631] | 3184511         | A→C         | <i>yqjG</i>      | I152L     |              |
| 100.0                      | 0.495         | [0.383, 0.617] | 1569491         | T→G         | <i>ydeU</i>      | -         |              |
| 99.7                       | 0.497         | [0.382, 0.620] | 1879113         | T→G         | <i>yoaE</i>      | K351T     |              |
| 99.6                       | 0.517         | [0.392, 0.636] | 4124667         | A→C         | <i>pfID</i>      | Y189S     |              |

**Table S7 | SNPs predicted in 40K mixed-population sample**

| <b>-log<sub>10</sub> E</b> | <b>fr new</b> | <b>95% CL</b>  | <b>position</b> | <b>base</b> | <b>gene</b>           | <b>aa</b> | <b>notes</b> |
|----------------------------|---------------|----------------|-----------------|-------------|-----------------------|-----------|--------------|
| 99.6                       | 0.598         | [0.484, 0.705] | 311852          | A→C         | <i>yahG</i>           | K293N     |              |
| 99.1                       | 0.573         | [0.464, 0.683] | 2341014         | T→G         | <i>nuoH</i>           | E7A       |              |
| 98.6                       | 0.489         | [0.372, 0.605] | 3917503         | T→G         | <i>ilvA</i>           | F124C     | C40K         |
| 98.3                       | 0.502         | [0.383, 0.619] | 1539153         | A→C         | <i>dos</i>            | I173M     |              |
| 98.2                       | 0.522         | [0.398, 0.647] | 1987874         | T→G         | <i>yeeJ</i>           | N1671K    | C40K         |
| 98.1                       | 0.551         | [0.419, 0.666] | 1866969         | A→C         | <i>fadD</i>           | D452E     |              |
| 97.5                       | 0.561         | [0.435, 0.673] | 126070          | T→G         | <i>aceE</i>           | S84A      |              |
| 97.4                       | 0.594         | [0.478, 0.701] | 1421493         | T→G         | ECB_01341             | F258C     |              |
| 97.2                       | 0.481         | [0.365, 0.599] | 2861475         | A→C         | <i>ptsP</i>           | I527S     |              |
| 97.1                       | 0.457         | [0.349, 0.572] | 4511435         | A→C         | <i>sgcX</i>           | S119A     | C40K         |
| 96.8                       | 0.516         | [0.391, 0.638] | 1145382         | T→G         | <i>flgA</i>           | L18F      |              |
| 95.9                       | 0.477         | [0.361, 0.591] | 771751          | A→C         | <i>galE</i>           | W312G     |              |
| 95.8                       | 0.434         | [0.322, 0.536] | 466947          | A→C         | <i>recR</i>           | E159A     |              |
| 95.4                       | 0.277         | [0.205, 0.355] | 2770060         | T→G         | <i>cysN</i>           | E74A      |              |
| 95.4                       | 0.564         | [0.447, 0.680] | 274584          | T→G         | <i>ykgJ/yagV</i>      | -         |              |
| 94.7                       | 0.639         | [0.522, 0.734] | 2506175         | T→G         | <i>aegA</i>           | E60A      |              |
| 94.4                       | 0.531         | [0.394, 0.652] | 1544321         | A→C         | <i>xasA</i>           | F40L      |              |
| 94.3                       | 0.454         | [0.343, 0.572] | 454759          | A→C         | <i>acrB</i>           | V571G     |              |
| 94.2                       | 0.568         | [0.454, 0.691] | 2577786         | A→C         | <i>hscA</i>           | *617E     |              |
| 93.9                       | 0.560         | [0.441, 0.676] | 4581674         | A→C         | <i>tsr</i>            | G261G     |              |
| 93.8                       | 0.533         | [0.396, 0.650] | 4606447         | A→C         | <i>yjil/deoC</i>      | -         |              |
| 93.5                       | 0.514         | [0.388, 0.642] | 3724516         | T→G         | <i>secB</i>           | N127H     | C40K         |
| 93.2                       | 0.467         | [0.353, 0.585] | 3482156         | T→G         | <i>malT</i>           | L158V     |              |
| 93.1                       | 0.475         | [0.360, 0.592] | 14590           | A→C         | <i>dnaJ</i>           | E142A     |              |
| 92.5                       | 0.472         | [0.355, 0.585] | 2831467         | A→C         | <i>fucl</i>           | Q422P     |              |
| 92.5                       | 0.548         | [0.419, 0.670] | 3829499         | T→G         | <i>gidR</i>           | I47L      |              |
| 92.3                       | 0.515         | [0.384, 0.646] | 2663688         | T→G         | <i>yfiR</i>           | I136S     |              |
| 92.0                       | 0.521         | [0.378, 0.638] | 3092844         | T→G         | <i>yqhH</i>           | L16V      |              |
| 92.0                       | 0.547         | [0.411, 0.664] | 411119          | T→G         | <i>thil</i>           | D383E     |              |
| 91.9                       | 0.536         | [0.404, 0.652] | 4119884         | A→C         | <i>ptsA</i>           | V815V     |              |
| 91.6                       | 0.574         | [0.454, 0.695] | 2659676         | T→G         | <i>pheA</i>           | H175Q     |              |
| 91.4                       | 0.478         | [0.358, 0.592] | 463771          | A→C         | <i>apt</i>            | E98A      | C40K         |
| 91.1                       | 0.551         | [0.420, 0.661] | 3275625         | T→G         | <i>yrbG</i>           | I39S      |              |
| 91.0                       | 0.589         | [0.474, 0.704] | 3288693         | T→G         | <i>yhcC</i>           | Q198P     |              |
| 91.0                       | 0.510         | [0.377, 0.640] | 3478384         | T→G         | <i>malQ</i>           | K96T      |              |
| 90.7                       | 0.485         | [0.361, 0.600] | 2387080         | A→C         | <i>yfcK</i>           | P575P     | C40K         |
| 90.5                       | 0.475         | [0.355, 0.593] | 3932175         | T→G         | <i>wecB</i>           | I81M      | C40K         |
| 90.0                       | 0.502         | [0.378, 0.636] | 4403583         | A→C         | <i>rpsF</i>           | K104T     | C40K         |
| 89.9                       | 0.493         | [0.370, 0.616] | 214869          | A→C         | <i>yaeR</i>           | N51H      |              |
| 89.8                       | 0.569         | [0.440, 0.684] | 3720948         | T→G         | <i>lldD</i>           | T104T     |              |
| 89.8                       | 0.502         | [0.378, 0.623] | 3179466         | A→C         | <i>exuT</i>           | L443F     |              |
| 89.6                       | 0.464         | [0.351, 0.587] | 1477302         | A→C         | <i>ydcP</i>           | I138L     | C40K         |
| 89.5                       | 0.476         | [0.360, 0.601] | 90037           | T→G         | <i>ilvI</i>           | V535G     |              |
| 89.4                       | 0.477         | [0.361, 0.600] | 471680          | T→G         | <i>aes</i>            | I121L     | C40K         |
| 89.4                       | 0.541         | [0.410, 0.664] | 1715410         | T→G         | <i>purR</i>           | N100K     |              |
| 89.4                       | 0.431         | [0.321, 0.542] | 1619782         | T→G         | <i>hokD/ECB_01533</i> | -         |              |
| 89.0                       | 0.447         | [0.330, 0.561] | 2739365         | T→G         | <i>hycF</i>           | E83A      |              |
| 88.6                       | 0.512         | [0.375, 0.642] | 1726466         | T→G         | <i>ydhT</i>           | S121R     |              |
| 88.6                       | 0.497         | [0.376, 0.625] | 1935892         | C→A         | <i>torY</i>           | M337I     |              |
| 88.5                       | 0.583         | [0.461, 0.696] | 140021          | A→C         | <i>cueO</i>           | N46H      |              |
| 88.4                       | 0.559         | [0.433, 0.684] | 1986212         | T→G         | <i>yeeJ</i>           | F1117L    |              |
| 88.0                       | 0.516         | [0.387, 0.645] | 2644861         | T→G         | <i>pssA</i>           | D214E     |              |
| 87.9                       | 0.546         | [0.418, 0.673] | 2892605         | T→G         | <i>ygeW</i>           | Y197D     |              |
| 87.8                       | 0.485         | [0.352, 0.616] | 3938427         | G→T         | <i>wzxE</i>           | G117V     |              |
| 87.7                       | 0.533         | [0.403, 0.659] | 116302          | A→C         | <i>guaC</i>           | K19Q      |              |
| 87.7                       | 0.535         | [0.411, 0.666] | 3378700         | T→G         | <i>rplB</i>           | A190A     |              |

**Table S7 | SNPs predicted in 40K mixed-population sample**

| <b>-log<sub>10</sub> E</b> | <b>fr new</b> | <b>95% CL</b>  | <b>position</b> | <b>base</b> | <b>gene</b>           | <b>aa</b> | <b>notes</b> |
|----------------------------|---------------|----------------|-----------------|-------------|-----------------------|-----------|--------------|
| 87.4                       | 0.504         | [0.377, 0.625] | 1550111         | A→C         | <i>yddB</i>           | F487C     |              |
| 86.6                       | 0.482         | [0.359, 0.602] | 3711747         | A→C         | <i>yibL/ECB_03459</i> | –         | C40K         |
| 86.2                       | 0.470         | [0.346, 0.588] | 2500146         | A→C         | <i>talA</i>           | E218A     |              |
| 86.0                       | 0.534         | [0.4, 0.664]   | 984510          | T→G         | <i>msbA</i>           | V266V     |              |
| 85.8                       | 0.496         | [0.375, 0.627] | 1320730         | A→C         | <i>trpL/yciV</i>      | –         |              |
| 85.6                       | 0.546         | [0.410, 0.666] | 3178270         | A→C         | <i>exuT</i>           | K45Q      |              |
| 85.6                       | 0.491         | [0.369, 0.619] | 3998959         | A→C         | <i>ubiB</i>           | D88A      | C40K         |
| 85.5                       | 0.528         | [0.401, 0.664] | 4280814         | T→G         | <i>yjcQ</i>           | I363L     |              |
| 85.4                       | 0.510         | [0.375, 0.643] | 2084094         | T→G         | <i>yegI</i>           | E24D      |              |
| 85.1                       | 0.581         | [0.461, 0.689] | 2826819         | A→C         | <i>ECB_02650</i>      | S160A     |              |
| 85.1                       | 0.511         | [0.371, 0.628] | 2324823         | T→G         | <i>menD</i>           | D317A     |              |
| 84.5                       | 0.618         | [0.507, 0.725] | 4318148         | T→G         | <i>adiA</i>           | H364P     |              |
| 84.4                       | 0.567         | [0.441, 0.689] | 2192971         | A→C         | <i>galS/yeiB</i>      | –         |              |
| 84.3                       | 0.543         | [0.420, 0.671] | 122775          | T→G         | <i>ampE</i>           | S231A     |              |
| 84.2                       | 0.465         | [0.348, 0.597] | 3384665         | A→C         | <i>gspD</i>           | R128R     |              |
| 84.2                       | 0.648         | [0.530, 0.751] | 1052737         | T→G         | <i>hyaC</i>           | F194C     |              |
| 83.7                       | 0.576         | [0.447, 0.698] | 4179222         | T→G         | <i>yjaG</i>           | F36C      |              |
| 83.5                       | 0.442         | [0.325, 0.561] | 1867570         | A→C         | <i>fadD</i>           | L252R     |              |
| 83.4                       | 0.534         | [0.400, 0.665] | 1513007         | T→G         | <i>narZ</i>           | K1245N    |              |
| 83.4                       | 0.583         | [0.449, 0.701] | 2948714         | T→G         | <i>sbm</i>            | V705G     |              |
| 83.2                       | 0.476         | [0.354, 0.604] | 4033030         | T→G         | <i>glnG</i>           | E169D     |              |
| 83.0                       | 0.503         | [0.373, 0.644] | 10269           | A→C         | <i>yaaH</i>           | F75C      | C40K         |
| 82.6                       | 0.389         | [0.284, 0.496] | 808158          | T→G         | <i>uvrB</i>           | F669L     | C40K         |
| 82.3                       | 0.509         | [0.371, 0.647] | 3614898         | A→C         | <i>yhjK</i>           | A58A      |              |
| 82.3                       | 0.577         | [0.441, 0.697] | 161258          | A→C         | <i>pcnB</i>           | D229E     |              |
| 82.0                       | 0.534         | [0.389, 0.664] | 1796383         | A→C         | <i>ceiD</i>           | P110P     |              |
| 81.9                       | 0.397         | [0.288, 0.502] | 4238487         | T→G         | <i>zur</i>            | E150A     |              |
| 81.6                       | 0.464         | [0.338, 0.582] | 1538251         | A→C         | <i>dos</i>            | L474R     |              |
| 81.6                       | 0.585         | [0.455, 0.703] | 434661          | T→G         | <i>ppiD</i>           | F231C     |              |
| 81.5                       | 0.362         | [0.261, 0.466] | 2759524         | A→C         | <i>ygbM</i>           | E143A     | C40K         |
| 81.2                       | 0.472         | [0.342, 0.588] | 3375800         | A→C         | <i>rplN</i>           | V85V      |              |
| 81.2                       | 0.534         | [0.399, 0.668] | 3500952         | A→C         | <i>glgX</i>           | L608V     | C40K         |
| 81.2                       | 0.399         | [0.285, 0.526] | 3718728         | G→T         | <i>lldP</i>           | G174C     | C40K         |
| 81.1                       | 0.458         | [0.338, 0.581] | 3106762         | A→C         | <i>mdaB</i>           | N21H      |              |
| 81.0                       | 0.592         | [0.464, 0.711] | 2366449         | A→C         | <i>yfcl</i>           | F228C     |              |
| 80.9                       | 0.516         | [0.381, 0.654] | 3888652         | A→C         | <i>yieM</i>           | L438R     |              |
| 79.6                       | 0.437         | [0.322, 0.560] | 3281577         | A→C         | <i>yhbH</i>           | N57T      | C40K         |
| 79.6                       | 0.536         | [0.400, 0.663] | 3540412         | T→G         | <i>yhhQ</i>           | F170V     |              |
| 79.4                       | 0.457         | [0.335, 0.582] | 768010          | T→G         | <i>gpmA</i>           | D72A      |              |
| 79.3                       | 0.482         | [0.357, 0.613] | 2146981         | A→C         | <i>metG</i>           | V495V     |              |
| 79.2                       | 0.501         | [0.370, 0.630] | 1570553         | A→C         | <i>ydeU</i>           | –         | C40K         |
| 79.2                       | 0.403         | [0.289, 0.532] | 3573398         | C→A         | <i>yhiQ</i>           | W142L     |              |
| 79.0                       | 0.453         | [0.335, 0.581] | 3922213         | A→C         | <i>yifN</i>           | –         | C40K         |
| 79.0                       | 0.579         | [0.450, 0.706] | 1087261         | T→G         | <i>ycdJ</i>           | E263D     |              |
| 78.9                       | 0.591         | [0.462, 0.703] | 3030817         | A→C         | <i>yghE</i>           | –         |              |
| 78.9                       | 0.557         | [0.425, 0.685] | 2229500         | T→G         | <i>yejG/bcr</i>       | –         |              |
| 78.8                       | 0.468         | [0.344, 0.599] | 4268795         | A→C         | <i>nrfC</i>           | S19R      |              |
| 78.8                       | 0.353         | [0.256, 0.454] | 125265          | A→C         | <i>pdhR</i>           | K124Q     | C40K         |
| 78.5                       | 0.412         | [0.307, 0.520] | 1522293         | A→C         | <i>fdnG</i>           | K248T     | C40K         |
| 78.4                       | 0.432         | [0.315, 0.554] | 3211263         | T→G         | <i>agaR</i>           | I111L     | C40K         |
| 78.4                       | 0.509         | [0.369, 0.650] | 4413951         | T→G         | <i>fkIB</i>           | F6L       |              |
| 78.4                       | 0.521         | [0.379, 0.657] | 643694          | T→G         | <i>ybeF</i>           | M90L      | C40K         |
| 78.4                       | 0.511         | [0.371, 0.647] | 1870303         | A→C         | <i>yoaA</i>           | L504W     |              |
| 78.2                       | 0.411         | [0.300, 0.534] | 383083          | A→C         | <i>sbuC</i>           | L365R     | C40K         |
| 78.1                       | 0.613         | [0.496, 0.729] | 613568          | T→G         | <i>cstA</i>           | –         |              |
| 78.1                       | 0.449         | [0.324, 0.568] | 1690600         | T→G         | <i>ydgR</i>           | F213C     | C40K         |

**Table S7 | SNPs predicted in 40K mixed-population sample**

| <b>-log<sub>10</sub> E</b> | <b>fr new</b> | <b>95% CL</b>  | <b>position</b> | <b>base</b> | <b>gene</b>      | <b>aa</b> | <b>notes</b> |
|----------------------------|---------------|----------------|-----------------|-------------|------------------|-----------|--------------|
| 77.8                       | 0.543         | [0.398, 0.667] | 4158399         | T→G         | <i>rplK</i>      | A114A     |              |
| 77.8                       | 0.503         | [0.371, 0.647] | 618019          | T→G         | <i>ybdM</i>      | S19R      |              |
| 77.7                       | 0.573         | [0.448, 0.697] | 532283          | T→G         | <i>sfmD</i>      | L160W     |              |
| 77.6                       | 0.625         | [0.502, 0.732] | 3679502         | A→C         | <i>sgbH</i>      | K157T     |              |
| 77.5                       | 0.467         | [0.343, 0.598] | 2181152         | T→G         | <i>yohl</i>      | Q158P     |              |
| 77.4                       | 0.475         | [0.348, 0.607] | 103062          | T→G         | <i>murG</i>      | A205A     |              |
| 77.4                       | 0.481         | [0.352, 0.605] | 1634870         | T→G         | <i>ynfD</i>      | I37M      | C40K         |
| 77.3                       | 0.533         | [0.387, 0.668] | 1801265         | A→C         | <i>ydjQ</i>      | E162D     |              |
| 77.3                       | 0.456         | [0.340, 0.589] | 3270765         | A→C         | <i>murA</i>      | F322C     |              |
| 77.3                       | 0.500         | [0.369, 0.632] | 4613809         | A→C         | <i>serB</i>      | K234T     | C40K         |
| 77.2                       | 0.507         | [0.366, 0.654] | 685932          | A→C         | <i>nagB/nagE</i> | -         |              |
| 77.0                       | 0.525         | [0.377, 0.660] | 2398568         | A→C         | <i>yfcTU</i>     | I33S      |              |
| 76.9                       | 0.424         | [0.317, 0.546] | 2790674         | T→G         | <i>ygcE</i>      | D93E      | C40K         |
| 76.7                       | 0.550         | [0.416, 0.683] | 3620566         | T→G         | <i>yhjN</i>      | I512L     |              |
| 76.6                       | 0.450         | [0.325, 0.575] | 4590702         | A→C         | <i>dnaT</i>      | V17G      |              |
| 76.6                       | 0.492         | [0.351, 0.632] | 3722953         | G→T         | <i>cysE</i>      | R126S     | C40K         |
| 76.6                       | 0.387         | [0.284, 0.501] | 2159082         | A→C         | <i>yehM</i>      | H731P     | C40K         |
| 76.4                       | 0.544         | [0.406, 0.676] | 1007123         | T→G         | <i>pncB</i>      | I109L     |              |
| 76.4                       | 0.526         | [0.386, 0.668] | 2189980         | T→G         | <i>mglA</i>      | K183T     |              |
| 76.4                       | 0.414         | [0.301, 0.534] | 1161679         | A→C         | <i>yceD</i>      | Y106S     |              |
| 76.3                       | 0.516         | [0.379, 0.637] | 2503021         | G→T         | <i>ypfG</i>      | L195L     | C40K         |
| 76.1                       | 0.486         | [0.353, 0.617] | 3967850         | A→C         | <i>rarD</i>      | L255R     |              |
| 75.9                       | 0.545         | [0.406, 0.679] | 3945354         | T→G         | <i>aslB</i>      | I199M     |              |
| 75.9                       | 0.554         | [0.415, 0.683] | 4538522         | A→C         | <i>yjiE</i>      | S228A     |              |
| 75.8                       | 0.447         | [0.326, 0.575] | 3624864         | A→C         | <i>yhjQ</i>      | -         |              |
| 75.8                       | 0.531         | [0.388, 0.666] | 1909010         | A→C         | <i>yebF/yebG</i> | -         | C40K         |
| 75.6                       | 0.543         | [0.407, 0.674] | 818258          | A→C         | <i>ybhR</i>      | L159R     |              |
| 75.5                       | 0.462         | [0.336, 0.591] | 3190478         | A→C         | <i>yhaO</i>      | L168R     |              |
| 75.4                       | 0.568         | [0.432, 0.694] | 1538177         | A→C         | <i>dos</i>       | Y499D     |              |
| 75.3                       | 0.516         | [0.374, 0.664] | 1741713         | A→C         | <i>sufA/ydiH</i> | -         |              |
| 75.0                       | 0.545         | [0.416, 0.680] | 3601216         | A→C         | <i>yhjB</i>      | D57E      |              |
| 74.8                       | 0.512         | [0.380, 0.654] | 59693           | A→C         | <i>imp</i>       | S538A     |              |
| 74.8                       | 0.623         | [0.499, 0.738] | 4308047         | T→G         | <i>yjdA</i>      | I733M     |              |
| 74.8                       | 0.587         | [0.457, 0.715] | 2920951         | T→G         | <i>prfB</i>      | E362A     | C40K         |
| 74.5                       | 0.442         | [0.321, 0.567] | 1278683         | A→C         | <i>narK</i>      | I193L     | C40K         |
| 74.5                       | 0.508         | [0.367, 0.653] | 1976045         | T→G         | <i>yedV</i>      | E36A      |              |
| 74.3                       | 0.474         | [0.347, 0.607] | 1105099         | T→G         | <i>ycdR</i>      | I348I     |              |
| 74.2                       | 0.468         | [0.339, 0.591] | 2240529         | A→C         | <i>narP</i>      | D14A      |              |
| 74.2                       | 0.427         | [0.310, 0.554] | 2898260         | T→G         | <i>yqeA/yqeB</i> | -         |              |
| 73.6                       | 0.480         | [0.343, 0.609] | 2939257         | T→G         | <i>ubiH</i>      | I5L       |              |
| 73.6                       | 0.532         | [0.384, 0.672] | 839969          | T→G         | <i>glnH</i>      | K221Q     |              |
| 73.5                       | 0.420         | [0.303, 0.545] | 3016033         | T→G         | ECB_02816        | I485S     |              |
| 73.5                       | 0.584         | [0.449, 0.705] | 1413982         | T→G         | <i>recE</i>      | K192T     |              |
| 73.4                       | 0.554         | [0.405, 0.683] | 3855776         | A→C         | <i>yieG</i>      | S399A     |              |
| 73.3                       | 0.526         | [0.387, 0.668] | 2083327         | T→G         | <i>yegl</i>      | E280A     |              |
| 73.1                       | 0.396         | [0.288, 0.520] | 3492316         | T→G         | <i>glpD/yzgL</i> | -         |              |
| 73.0                       | 0.340         | [0.240, 0.446] | 342446          | A→C         | <i>mhpA</i>      | E427A     | C40K         |
| 72.5                       | 0.454         | [0.325, 0.584] | 4353840         | A→C         | <i>yjeK</i>      | W177G     | C40K         |
| 72.3                       | 0.454         | [0.325, 0.576] | 931180          | A→C         | <i>ybjE</i>      | L129V     | C40K         |
| 72.2                       | 0.501         | [0.366, 0.637] | 326195          | T→G         | <i>prpE</i>      | A280A     |              |
| 72.1                       | 0.525         | [0.386, 0.668] | 3574318         | A→C         | <i>prlC</i>      | S519A     |              |
| 72.0                       | 0.576         | [0.441, 0.701] | 4355818         | T→G         | <i>sugE</i>      | L78R      |              |
| 71.9                       | 0.482         | [0.349, 0.618] | 1738400         | A→C         | <i>sufD</i>      | F220C     | C40K         |
| 71.9                       | 0.592         | [0.457, 0.720] | 1364451         | A→C         | <i>goaG</i>      | S178S     |              |
| 71.9                       | 0.534         | [0.396, 0.675] | 4307275         | T→G         | <i>yjdA</i>      | I476S     |              |
| 71.8                       | 0.461         | [0.330, 0.594] | 4058150         | A→C         | <i>yiiF/fdhE</i> | -         |              |

**Table S7 | SNPs predicted in 40K mixed-population sample**

| <b>-log<sub>10</sub> E</b> | <b>fr new</b> | <b>95% CL</b>  | <b>position</b> | <b>base</b> | <b>gene</b>      | <b>aa</b> | <b>notes</b> |
|----------------------------|---------------|----------------|-----------------|-------------|------------------|-----------|--------------|
| 71.7                       | 0.519         | [0.378, 0.661] | 3768014         | A→C         | <i>yicE</i>      | N10H      |              |
| 71.7                       | 0.570         | [0.433, 0.703] | 3096581         | A→C         | <i>sufI</i>      | V87V      |              |
| 71.7                       | 0.508         | [0.374, 0.644] | 1966410         | C→A         | <i>yecR</i>      | G65G      | C40K         |
| 71.6                       | 0.523         | [0.373, 0.664] | 941033          | T→G         | <i>clpA</i>      | V307V     |              |
| 71.4                       | 0.508         | [0.369, 0.650] | 2075227         | A→C         | <i>dcd</i>       | L65L      | C40K         |
| 71.3                       | 0.488         | [0.360, 0.626] | 1555678         | A→C         | <i>ydeN</i>      | V266V     | C40K         |
| 71.3                       | 0.400         | [0.284, 0.515] | 3856914         | A→C         | <i>yieG</i>      | F19L      | C40K         |
| 71.3                       | 0.484         | [0.341, 0.625] | 3574505         | C→A         | <i>prlC</i>      | P456P     | C40K         |
| 71.2                       | 0.394         | [0.281, 0.507] | 3650528         | A→C         | <i>cspA</i>      | I8L       | C40K         |
| 71.2                       | 0.547         | [0.406, 0.680] | 2625494         | T→G         | <i>rncS</i>      | E21A      | C40K         |
| 71.1                       | 0.514         | [0.376, 0.662] | 1808909         | T→G         | <i>astC</i>      | L113L     |              |
| 70.8                       | 0.492         | [0.357, 0.628] | 1543641         | A→C         | <i>xasA</i>      | L267R     |              |
| 70.6                       | 0.565         | [0.423, 0.698] | 898853          | T→G         | ECB_00842        | I84M      |              |
| 70.3                       | 0.393         | [0.281, 0.513] | 4552312         | T→G         | <i>yjiV</i>      | -         | C40K         |
| 70.1                       | 0.414         | [0.303, 0.546] | 1331374         | A→C         | <i>topA</i>      | E652A     |              |
| 70.0                       | 0.341         | [0.240, 0.445] | 3459043         | A→C         | <i>hslO</i>      | K196Q     | C40K         |
| 69.9                       | 0.301         | [0.215, 0.404] | 2740772         | A→C         | <i>hycE</i>      | L187R     | C40K         |
| 69.8                       | 0.558         | [0.425, 0.699] | 4275557         | T→G         | <i>yjcO</i>      | N131H     |              |
| 69.6                       | 0.404         | [0.289, 0.532] | 424738          | T→G         | <i>yajG</i>      | V45V      | C40K         |
| 69.6                       | 0.571         | [0.433, 0.699] | 801303          | A→C         | <i>bioA</i>      | F194C     |              |
| 69.5                       | 0.560         | [0.423, 0.698] | 2079706         | T→G         | <i>yegE</i>      | Y1079D    |              |
| 69.3                       | 0.594         | [0.458, 0.720] | 1680600         | A→C         | <i>ydqJ</i>      | A301A     |              |
| 69.2                       | 0.493         | [0.354, 0.629] | 575344          | A→C         | <i>cusS</i>      | F110L     | C40K         |
| 69.1                       | 0.447         | [0.316, 0.577] | 1332725         | A→C         | <i>cysB</i>      | N167H     |              |
| 69.0                       | 0.449         | [0.315, 0.577] | 1798721         | A→C         | <i>celA</i>      | L55*      |              |
| 68.9                       | 0.614         | [0.471, 0.721] | 2396548         | A→C         | <i>yfcTU</i>     | V706V     |              |
| 68.5                       | 0.369         | [0.261, 0.483] | 4545297         | T→G         | <i>yjiL</i>      | K103Q     | C40K         |
| 68.4                       | 0.395         | [0.277, 0.517] | 1411992         | T→G         | <i>recE</i>      | S855S     |              |
| 68.4                       | 0.606         | [0.472, 0.726] | 370685          | A→C         | <i>phoA</i>      | S431S     |              |
| 68.4                       | 0.612         | [0.473, 0.731] | 2992993         | A→C         | <i>speC</i>      | F608C     |              |
| 68.4                       | 0.583         | [0.450, 0.720] | 3471921         | T→G         | <i>yhgA</i>      | F30L      |              |
| 68.3                       | 0.595         | [0.457, 0.720] | 3428587         | A→C         | <i>yhfM</i>      | K258T     |              |
| 68.3                       | 0.403         | [0.289, 0.521] | 3835234         | A→C         | <i>dgoR</i>      | S96R      | C40K         |
| 68.3                       | 0.623         | [0.497, 0.750] | 3410000         | A→C         | <i>yheS</i>      | K269N     |              |
| 68.2                       | 0.606         | [0.468, 0.732] | 4526090         | T→G         | <i>fimD</i>      | F27L      |              |
| 68.1                       | 0.560         | [0.423, 0.702] | 1891498         | T→G         | <i>prc</i>       | K632N     |              |
| 68.0                       | 0.381         | [0.272, 0.501] | 100218          | A→C         | <i>murD</i>      | I110L     | C40K         |
| 68.0                       | 0.390         | [0.272, 0.521] | 1464880         | C→A         | <i>ydcl</i>      | D101Y     | C40K         |
| 67.7                       | 0.592         | [0.457, 0.707] | 383324          | G→T         | <i>sbcC</i>      | L285M     |              |
| 67.7                       | 0.405         | [0.290, 0.537] | 2479320         | A→C         | <i>ypeA</i>      | M113R     |              |
| 67.5                       | 0.586         | [0.450, 0.720] | 1578876         | A→C         | <i>yneF/yneG</i> | -         |              |
| 67.4                       | 0.516         | [0.358, 0.664] | 3187264         | A→C         | <i>yhaJ/yhaK</i> | -         | C40K         |
| 67.4                       | 0.528         | [0.383, 0.676] | 4048871         | A→C         | <i>yihS</i>      | W345G     |              |
| 67.2                       | 0.549         | [0.405, 0.685] | 1017850         | A→C         | <i>ycbS</i>      | Q515P     |              |
| 67.0                       | 0.467         | [0.333, 0.602] | 298983          | T→G         | <i>betA</i>      | Q305P     | C40K         |
| 67.0                       | 0.355         | [0.242, 0.475] | 47721           | C→A         | <i>fixB</i>      | T113T     | C40K         |
| 66.9                       | 0.515         | [0.369, 0.650] | 1706773         | C→A         | <i>lhr</i>       | R165S     | C40K         |
| 66.9                       | 0.516         | [0.358, 0.664] | 2062763         | T→G         | <i>wcaE</i>      | I32L      |              |
| 66.8                       | 0.399         | [0.284, 0.524] | 3680670         | T→G         | <i>sgbE</i>      | P43P      |              |
| 66.7                       | 0.476         | [0.337, 0.613] | 3499025         | T→G         | <i>glgA</i>      | K155Q     | C40K         |
| 66.5                       | 0.610         | [0.483, 0.740] | 1837790         | T→G         | <i>ydjL</i>      | I258L     |              |
| 66.5                       | 0.599         | [0.450, 0.720] | 2387986         | A→C         | <i>yfcM</i>      | C120G     |              |
| 66.4                       | 0.508         | [0.349, 0.652] | 1586990         | G→A         | <i>marR</i>      | P35P      |              |
| 66.3                       | 0.467         | [0.318, 0.607] | 704406          | G→T         | <i>kdpD</i>      | R703S     |              |
| 66.1                       | 0.641         | [0.505, 0.754] | 3559434         | T→G         | <i>yhiH</i>      | I265L     |              |
| 66.1                       | 0.457         | [0.327, 0.594] | 1599820         | A→C         | <i>ydfJ</i>      | V78G      | C40K         |

**Table S7 | SNPs predicted in 40K mixed-population sample**

| <b>-log<sub>10</sub> E</b> | <b>fr new</b> | <b>95% CL</b>  | <b>position</b> | <b>base</b> | <b>gene</b>      | <b>aa</b> | <b>notes</b> |
|----------------------------|---------------|----------------|-----------------|-------------|------------------|-----------|--------------|
| 66.0                       | 0.483         | [0.341, 0.624] | 261741          | A→C         | <i>yafA</i>      | T242P     |              |
| 66.0                       | 0.543         | [0.404, 0.690] | 2010682         | T→G         | <i>yeeA</i>      | Y118S     |              |
| 65.9                       | 0.580         | [0.441, 0.714] | 3184072         | T→G         | <i>yqjG</i>      | I5M       | C40K         |
| 65.9                       | 0.388         | [0.276, 0.512] | 2587662         | A→C         | <i>hcaT</i>      | V295G     | C40K         |
| 65.8                       | 0.459         | [0.333, 0.593] | 1174059         | T→G         | <i>fhuE</i>      | T688P     |              |
| 65.8                       | 0.437         | [0.305, 0.569] | 837928          | T→G         | <i>ybiO</i>      | T60P      |              |
| 65.8                       | 0.564         | [0.414, 0.695] | 2560912         | T→G         | <i>hisS</i>      | V161V     |              |
| 65.7                       | 0.534         | [0.399, 0.667] | 3097048         | C→A         | <i>plsC</i>      | P202P     |              |
| 65.7                       | 0.589         | [0.450, 0.720] | 4369596         | T→G         | <i>yjeQ</i>      | K23N      |              |
| 65.6                       | 0.416         | [0.289, 0.546] | 1936718         | T→G         | <i>torY</i>      | K62T      | C40K         |
| 65.6                       | 0.405         | [0.291, 0.544] | 1993134         | A→C         | <i>amn</i>       | V25V      | C40K         |
| 65.5                       | 0.481         | [0.339, 0.611] | 1042577         | A→C         | <i>helD</i>      | E339A     |              |
| 65.4                       | 0.640         | [0.516, 0.757] | 3530992         | A→C         | <i>rpoH</i>      | R159R     |              |
| 65.3                       | 0.467         | [0.330, 0.604] | 154388          | A→C         | <i>yadK</i>      | L18R      | C40K         |
| 65.3                       | 0.447         | [0.312, 0.576] | 2886673         | T→G         | <i>xdhA</i>      | W192G     |              |
| 65.3                       | 0.585         | [0.442, 0.710] | 2962850         | T→G         | <i>yggP</i>      | I120L     |              |
| 65.2                       | 0.387         | [0.271, 0.517] | 2489436         | A→C         | <i>eutG</i>      | L302W     | C40K         |
| 65.1                       | 0.444         | [0.321, 0.585] | 332612          | T→G         | <i>cynX</i>      | L22R      | C40K         |
| 65.1                       | 0.432         | [0.306, 0.568] | 3605645         | T→G         | <i>yhjE/yhjG</i> | -         | C40K         |
| 65.0                       | 0.451         | [0.317, 0.586] | 3661307         | T→G         | <i>xyIA/xyIF</i> | -         |              |
| 64.9                       | 0.575         | [0.442, 0.713] | 3945610         | T→G         | <i>aslB</i>      | S285A     | C40K         |
| 64.8                       | 0.505         | [0.354, 0.648] | 4344081         | C→T         | <i>cutA/dcuA</i> | -         |              |
| 64.8                       | 0.439         | [0.306, 0.569] | 2361786         | A→C         | <i>yfcC</i>      | N372H     | C40K         |
| 64.7                       | 0.612         | [0.477, 0.741] | 4393997         | T→G         | <i>aidB</i>      | L523W     |              |
| 64.7                       | 0.608         | [0.474, 0.730] | 3655740         | T→G         | <i>glyQ</i>      | I13L      |              |
| 64.5                       | 0.536         | [0.391, 0.692] | 1446528         | T→G         | <i>ydbD</i>      | F684C     |              |
| 64.4                       | 0.671         | [0.555, 0.777] | 3924548         | T→G         | <i>gppA</i>      | *495S     |              |
| 64.3                       | 0.559         | [0.413, 0.702] | 1476493         | A→C         | <i>ydcN</i>      | Q71P      |              |
| 64.3                       | 0.402         | [0.285, 0.537] | 2744019         | T→G         | <i>hycC</i>      | K28T      |              |
| 64.2                       | 0.396         | [0.275, 0.522] | 331559          | T→G         | <i>cynT</i>      | S69A      | C40K         |
| 64.1                       | 0.561         | [0.414, 0.696] | 31535           | T→G         | <i>rihC</i>      | N57K      |              |
| 64.1                       | 0.490         | [0.350, 0.632] | 439367          | T→G         | <i>ybaE</i>      | N5H       |              |
| 64.1                       | 0.445         | [0.308, 0.576] | 2342242         | A→C         | <i>nuoG</i>      | G507G     |              |
| 64.0                       | 0.472         | [0.334, 0.614] | 3786228         | T→G         | ECB_03524        | N14H      |              |
| 63.9                       | 0.454         | [0.314, 0.586] | 3290769         | A→C         | <i>glfB</i>      | A301A     |              |
| 63.9                       | 0.489         | [0.350, 0.633] | 1300941         | T→G         | <i>oppB</i>      | L150*     |              |
| 63.8                       | 0.590         | [0.450, 0.726] | 2010638         | A→C         | <i>yeeA</i>      | S133A     |              |
| 63.8                       | 0.535         | [0.395, 0.679] | 179508          | T→G         | <i>yadR</i>      | V19V      | C40K         |
| 63.7                       | 0.427         | [0.299, 0.553] | 1904444         | T→G         | <i>yobB</i>      | F143L     | C40K         |
| 63.6                       | 0.386         | [0.271, 0.515] | 3114886         | T→G         | <i>yqiC</i>      | Y98*      | C40K         |
| 63.4                       | 0.447         | [0.318, 0.585] | 2811069         | T→G         | <i>gudP/yqcA</i> | -         |              |
| 63.4                       | 0.414         | [0.285, 0.536] | 3617683         | T→G         | <i>bcsC</i>      | K328T     | C40K         |
| 63.3                       | 0.587         | [0.442, 0.719] | 184644          | A→C         | <i>degP</i>      | K307Q     |              |
| 63.1                       | 0.565         | [0.422, 0.698] | 4452279         | A→C         | <i>mgtA</i>      | T460P     |              |
| 63.0                       | 0.595         | [0.457, 0.717] | 3968878         | T→G         | <i>yigl</i>      | E85D      |              |
| 62.8                       | 0.578         | [0.432, 0.714] | 3479626         | T→G         | <i>malP</i>      | Q483P     |              |
| 62.8                       | 0.452         | [0.320, 0.595] | 3562858         | T→G         | <i>yhiJ</i>      | N141H     |              |
| 62.7                       | 0.373         | [0.257, 0.496] | 1036240         | T→G         | <i>ompA</i>      | E302A     | C40K         |
| 62.6                       | 0.611         | [0.459, 0.730] | 3902663         | T→G         | <i>yieP</i>      | M158L     |              |
| 62.6                       | 0.369         | [0.256, 0.482] | 4139889         | T→G         | <i>udhA</i>      | K255Q     | C40K         |
| 62.6                       | 0.439         | [0.312, 0.576] | 1748131         | T→G         | <i>ydiL</i>      | L84V      |              |
| 62.5                       | 0.486         | [0.341, 0.625] | 1948158         | A→C         | <i>tap</i>       | S533A     |              |
| 62.4                       | 0.519         | [0.372, 0.668] | 2541919         | A→C         | <i>upp/purM</i>  | -         |              |
| 62.3                       | 0.624         | [0.492, 0.751] | 3483277         | A→C         | <i>malT</i>      | L531F     |              |
| 62.3                       | 0.499         | [0.356, 0.644] | 2897800         | T→G         | <i>yqeA</i>      | I195M     | C40K         |
| 62.0                       | 0.385         | [0.267, 0.513] | 4118298         | T→G         | <i>gldA</i>      | Q282P     | C40K         |



**Table S7 | SNPs predicted in 40K mixed-population sample**

| <b>-log<sub>10</sub> E</b> | <b>fr new</b> | <b>95% CL</b>  | <b>position</b> | <b>base</b> | <b>gene</b>      | <b>aa</b> | <b>notes</b> |
|----------------------------|---------------|----------------|-----------------|-------------|------------------|-----------|--------------|
| 62.0                       | 0.498         | [0.353, 0.648] | 3343513         | A→C         | <i>acrF</i>      | K197T     |              |
| 62.0                       | 0.574         | [0.441, 0.710] | 3517253         | G→A         | <i>ggt</i>       | L83L      |              |
| 61.9                       | 0.485         | [0.338, 0.627] | 3189084         | T→G         | <i>yhaM</i>      | I201L     |              |
| 61.8                       | 0.496         | [0.341, 0.625] | 4334857         | A→C         | <i>yjdL</i>      | L92R      |              |
| 61.7                       | 0.527         | [0.379, 0.685] | 1062586         | T→G         | <i>yccZ</i>      | L103L     |              |
| 61.5                       | 0.628         | [0.483, 0.746] | 1930515         | T→G         | <i>yecE</i>      | F117L     |              |
| 61.4                       | 0.513         | [0.358, 0.663] | 2602523         | T→G         | <i>yphG</i>      | N308H     |              |
| 61.4                       | 0.566         | [0.422, 0.713] | 146285          | A→C         | <i>yadG</i>      | D235A     |              |
| 61.3                       | 0.557         | [0.402, 0.699] | 4574169         | A→C         | <i>hpaX</i>      | F33C      |              |
| 61.3                       | 0.482         | [0.344, 0.637] | 2921752         | T→G         | <i>prfB</i>      | N95T      |              |
| 61.3                       | 0.457         | [0.320, 0.596] | 635217          | A→C         | <i>citA</i>      | E132A     | C40K         |
| 61.1                       | 0.529         | [0.377, 0.685] | 2508339         | T→G         | <i>narQ/acrD</i> | -         |              |
| 61.1                       | 0.492         | [0.341, 0.640] | 2165584         | G→T         | <i>yehU</i>      | V86V      | C40K         |
| 60.8                       | 0.439         | [0.309, 0.586] | 3991051         | A→C         | ECB_03719        | G196G     |              |
| 60.5                       | 0.465         | [0.329, 0.616] | 4227464         | T→G         | <i>lamB</i>      | Y188D     | C40K         |
| 60.3                       | 0.423         | [0.292, 0.552] | 3325845         | T→G         | <i>maf</i>       | E142A     | C40K         |
| 60.2                       | 0.391         | [0.272, 0.516] | 1395417         | T→G         | <i>ydaA</i>      | I126L     |              |
| 60.2                       | 0.525         | [0.367, 0.676] | 2410532         | A→C         | <i>yfdC</i>      | N264H     |              |
| 60.2                       | 0.537         | [0.382, 0.681] | 4288775         | A→C         | <i>alsA</i>      | I343S     |              |
| 59.9                       | 0.394         | [0.276, 0.530] | 1759732         | T→G         | <i>ydiS</i>      | V357G     | C40K         |
| 59.8                       | 0.546         | [0.391, 0.693] | 558583          | T→G         | ECB_00517/appY   | -         |              |
| 59.8                       | 0.411         | [0.286, 0.544] | 1547418         | T→G         | <i>pqqL</i>      | E579A     | C40K         |
| 59.8                       | 0.470         | [0.329, 0.615] | 4048043         | T→G         | <i>yihR</i>      | H169P     |              |
| 59.7                       | 0.578         | [0.423, 0.708] | 3493684         | A→C         | ECB_03279        | D82E      |              |
| 59.7                       | 0.309         | [0.205, 0.432] | 3495915         | G→T         | <i>glgP</i>      | G707G     | C40K         |
| 59.6                       | 0.410         | [0.274, 0.569] | 426998          | C→A         | <i>tig</i>       | F387L     | C40K         |
| 59.5                       | 0.382         | [0.267, 0.504] | 3564485         | T→G         | <i>yhiKL</i>     | G221G     |              |
| 59.5                       | 0.496         | [0.350, 0.633] | 4563802         | T→G         | <i>hsdR</i>      | E312A     |              |
| 59.1                       | 0.629         | [0.486, 0.751] | 3123205         | T→G         | <i>yqiH</i>      | N163K     |              |
| 58.9                       | 0.470         | [0.325, 0.617] | 4180803         | A→C         | <i>yjaH</i>      | E209A     | C40K         |
| 58.8                       | 0.479         | [0.332, 0.630] | 98071           | T→G         | <i>murF</i>      | F206L     | C40K         |
| 58.8                       | 0.473         | [0.329, 0.616] | 1308543         | T→G         | <i>ycil/tonB</i> | -         |              |
| 58.8                       | 0.376         | [0.262, 0.507] | 902709          | T→G         | <i>tfaE</i>      | A126A     | C40K         |
| 58.7                       | 0.520         | [0.372, 0.669] | 4099603         | T→G         | <i>menA</i>      | D77A      |              |
| 58.6                       | 0.479         | [0.332, 0.629] | 2285933         | T→G         | <i>gyrA</i>      | Y63S      | C40K         |
| 58.6                       | 0.368         | [0.246, 0.501] | 399655          | C→A         | <i>yajD/tsx</i>  | -         | C40K         |
| 58.5                       | 0.606         | [0.460, 0.736] | 1701303         | A→C         | <i>ydhK</i>      | P663P     |              |
| 58.4                       | 0.493         | [0.344, 0.639] | 333953          | T→G         | <i>lacA</i>      | N155T     |              |
| 58.4                       | 0.633         | [0.502, 0.761] | 1745953         | T→G         | <i>ydiJ/ydiK</i> | -         |              |
| 58.3                       | 0.366         | [0.258, 0.500] | 648307          | A→C         | <i>mrdB</i>      | I197M     | C40K         |
| 58.3                       | 0.460         | [0.325, 0.618] | 847206          | T→G         | <i>ybiR</i>      | L312*     | C40K         |
| 58.3                       | 0.451         | [0.312, 0.598] | 2925198         | A→C         | <i>xerD</i>      | L100R     |              |
| 58.1                       | 0.525         | [0.367, 0.676] | 4519579         | A→C         | <i>yjhA</i>      | S21A      |              |
| 58.0                       | 0.448         | [0.317, 0.586] | 1053748         | A→C         | <i>hyaE</i>      | N102H     |              |
| 58.0                       | 0.544         | [0.393, 0.684] | 2978466         | A→C         | <i>gshB</i>      | T280P     |              |
| 57.8                       | 0.311         | [0.214, 0.426] | 477305          | T→G         | <i>ushA</i>      | Y109D     |              |
| 57.6                       | 0.526         | [0.365, 0.682] | 1310805         | T→G         | <i>yciC</i>      | G151G     |              |
| 57.4                       | 0.296         | [0.206, 0.402] | 44987           | T→G         | <i>caiT</i>      | N380H     |              |
| 57.4                       | 0.503         | [0.352, 0.648] | 4557027         | T→G         | <i>mcrB</i>      | N86H      |              |
| 57.3                       | 0.675         | [0.546, 0.788] | 937322          | T→G         | <i>macB</i>      | F90L      |              |
| 57.2                       | 0.593         | [0.443, 0.730] | 200258          | A→C         | <i>yaeL</i>      | S291R     |              |
| 56.8                       | 0.400         | [0.276, 0.543] | 312970          | A→C         | <i>yahI</i>      | N53H      |              |
| 56.8                       | 0.434         | [0.303, 0.578] | 1129502         | A→C         | <i>yceE</i>      | F186L     | C40K         |
| 56.5                       | 0.490         | [0.351, 0.633] | 4326389         | A→C         | <i>dcuB</i>      | S357S     |              |
| 56.4                       | 0.512         | [0.358, 0.665] | 1209825         | T→G         | <i>ymfC</i>      | S166R     |              |
| 56.4                       | 0.390         | [0.261, 0.512] | 3716330         | A→C         | ECB_03460        | K1114Q    | C40K         |

**Table S7 | SNPs predicted in 40K mixed-population sample**

| <b>-log<sub>10</sub> E</b> | <b>fr new</b> | <b>95% CL</b>  | <b>position</b> | <b>base</b> | <b>gene</b>             | <b>aa</b> | <b>notes</b> |
|----------------------------|---------------|----------------|-----------------|-------------|-------------------------|-----------|--------------|
| 56.2                       | 0.457         | [0.312, 0.597] | 2480606         | A→C         | <i>amiA</i>             | I246L     |              |
| 56.2                       | 0.489         | [0.337, 0.642] | 4332868         | A→C         | <i>lysU</i>             | I190M     | C40K         |
| 56.2                       | 0.426         | [0.289, 0.589] | 1230389         | C→A         | <i>hlyE</i>             | –         | C40K         |
| 56.1                       | 0.381         | [0.262, 0.507] | 44865           | A→C         | <i>caiT</i>             | V420V     | C40K         |
| 56.1                       | 0.391         | [0.261, 0.518] | 2492626         | A→C         | <i>cchB</i>             | V85G      |              |
| 56.1                       | 0.493         | [0.346, 0.654] | 3842724         | T→G         | <i>dnaA</i>             | E456A     | C40K         |
| 56.1                       | 0.550         | [0.388, 0.702] | 797545          | T→G         | ECB_00738               | I264S     |              |
| 56.0                       | 0.504         | [0.348, 0.677] | 1227428         | T→G         | <i>ycgK</i>             | E69A      |              |
| 55.9                       | 0.592         | [0.443, 0.731] | 683582          | A→C         | <i>nagC</i>             | I36M      |              |
| 55.8                       | 0.399         | [0.280, 0.524] | 3806477         | A→C         | <i>uhpT</i>             | I208S     | C40K         |
| 55.8                       | 0.631         | [0.501, 0.761] | 1854584         | T→G         | <i>yoaF</i>             | N60H      |              |
| 55.6                       | 0.538         | [0.378, 0.689] | 243788          | A→C         | <i>yhhl</i>             | R326R     |              |
| 55.6                       | 0.374         | [0.256, 0.511] | 3824042         | A→C         | <i>glvBC</i>            | M1R       | C40K         |
| 55.5                       | 0.478         | [0.329, 0.616] | 2784895         | T→G         | <i>ycgR</i>             | Q54P      |              |
| 55.5                       | 0.476         | [0.325, 0.617] | 1424186         | A→C         | ECB_01344               | L6F       |              |
| 55.3                       | 0.625         | [0.468, 0.743] | 2308503         | A→C         | <i>yfaX</i>             | G74G      |              |
| 55.2                       | 0.609         | [0.453, 0.743] | 767623          | T→G         | <i>gpmA</i>             | E201A     |              |
| 55.2                       | 0.604         | [0.452, 0.737] | 77408           | A→C         | <i>tbpA</i>             | F293V     |              |
| 55.2                       | 0.361         | [0.244, 0.490] | 4064362         | T→G         | <i>fdhD</i>             | L67R      | C40K         |
| 55.1                       | 0.279         | [0.188, 0.384] | 3031898         | A→C         | ECB_02831               | F91L      |              |
| 54.9                       | 0.571         | [0.433, 0.710] | 1380965         | A→C         | <i>ompG</i>             | Y217S     |              |
| 54.8                       | 0.334         | [0.227, 0.454] | 627805          | T→G         | <i>citT</i>             | E276A     | C40K         |
| 54.8                       | 0.577         | [0.422, 0.724] | 3189699         | A→C         | <i>yhaM/yhaO</i>        | –         |              |
| 54.7                       | 0.388         | [0.265, 0.526] | 3683249         | T→G         | ECB_03437               | Y314D     | C40K         |
| 54.7                       | 0.410         | [0.271, 0.557] | 3341864         | C→A         | <i>acrE</i>             | P37Q      | C40K         |
| 54.6                       | 0.429         | [0.287, 0.568] | 3333231         | T→G         | <i>yhdH/accB</i>        | –         | C40K         |
| 54.5                       | 0.538         | [0.373, 0.700] | 3739217         | T→G         | <i>waaW</i>             | E250A     |              |
| 54.3                       | 0.407         | [0.280, 0.536] | 2002639         | A→C         | <i>cobS</i>             | L195*     | C40K         |
| 54.0                       | 0.388         | [0.258, 0.518] | 4078976         | A→C         | <i>rhaR</i>             | *313Y     | C40K         |
| 53.9                       | 0.406         | [0.275, 0.550] | 4466019         | A→C         | <i>vaiS</i>             | F284L     | C40K         |
| 53.7                       | 0.561         | [0.401, 0.705] | 4340009         | T→G         | <i>cadC</i>             | Q216P     |              |
| 53.7                       | 0.480         | [0.316, 0.639] | 4612969         | C→A         | <i>smf</i>              | R12L      |              |
| 53.7                       | 0.355         | [0.243, 0.490] | 2544260         | A→C         | <i>ppk</i>              | Q133P     |              |
| 53.6                       | 0.425         | [0.287, 0.568] | 1714815         | A→C         | ECB_01628               | L10V      | C40K         |
| 53.6                       | 0.378         | [0.251, 0.510] | 4116720         | T→G         | <i>yijE</i>             | I169S     | C40K         |
| 53.6                       | 0.529         | [0.362, 0.687] | 1270802         | T→G         | <i>ldrC/chaA</i>        | –         |              |
| 53.6                       | 0.371         | [0.252, 0.504] | 2258360         | A→C         | <i>yojI</i>             | I120M     | C40K         |
| 53.6                       | 0.616         | [0.470, 0.748] | 487930          | A→C         | <i>ybbK</i>             | F4L       |              |
| 53.4                       | 0.396         | [0.266, 0.533] | 1575413         | A→C         | <i>yneE</i>             | F52C      | C40K         |
| 53.3                       | 0.498         | [0.346, 0.656] | 2027918         | T→G         | <i>wzzB</i>             | Q130P     |              |
| 53.2                       | 0.444         | [0.299, 0.590] | 3414905         | T→G         | <i>yhfK</i>             | G70G      | C40K         |
| 53.2                       | 0.477         | [0.325, 0.634] | 3521505         | A→C         | <i>ugpA</i>             | F28C      | C40K         |
| 53.2                       | 0.376         | [0.251, 0.509] | 2947175         | A→C         | <i>sbm</i>              | E192A     | C40K         |
| 53.1                       | 0.509         | [0.358, 0.665] | 3152780         | C→A         | <i>ygjG</i>             | A166E     |              |
| 53.1                       | 0.611         | [0.461, 0.743] | 1782154         | A→C         | <i>arpB</i>             | –         |              |
| 53.1                       | 0.547         | [0.386, 0.708] | 2678812         | A→C         | ECB_02509/<br>ECB_02510 | –         |              |
| 53.0                       | 0.435         | [0.285, 0.569] | 181491          | T→G         | <i>pfs</i>              | I169L     | C40K         |
| 53.0                       | 0.450         | [0.306, 0.598] | 507691          | A→C         | <i>gcl</i>              | Q537P     |              |
| 53.0                       | 0.421         | [0.282, 0.559] | 4300648         | A→C         | <i>phnF</i>             | L199L     |              |
| 52.8                       | 0.583         | [0.433, 0.731] | 4207000         | T→G         | <i>yjbB</i>             | F113L     |              |
| 52.7                       | 0.464         | [0.317, 0.621] | 2839145         | A→C         | <i>csdA</i>             | E397A     |              |
| 52.6                       | 0.459         | [0.312, 0.610] | 1171882         | T→G         | <i>ycfH</i>             | I179M     | C40K         |
| 52.6                       | 0.447         | [0.300, 0.588] | 2073796         | A→C         | <i>asmA</i>             | A341A     |              |
| 52.5                       | 0.589         | [0.421, 0.724] | 697270          | A→C         | <i>pgm</i>              | S540R     |              |
| 52.5                       | 0.363         | [0.247, 0.496] | 2018771         | A→C         | <i>yeeZ</i>             | D267E     | C40K         |
| 52.5                       | 0.397         | [0.270, 0.542] | 4622949         | A→C         | <i>rob</i>              | I174M     |              |

**Table S7 | SNPs predicted in 40K mixed-population sample**

| <b>-log<sub>10</sub> E</b> | <b>fr new</b> | <b>95% CL</b>  | <b>position</b> | <b>base</b> | <b>gene</b>      | <b>aa</b> | <b>notes</b> |
|----------------------------|---------------|----------------|-----------------|-------------|------------------|-----------|--------------|
| 52.3                       | 0.395         | [0.270, 0.541] | 3188952         | A→C         | <i>yhaM</i>      | S245A     |              |
| 52.3                       | 0.472         | [0.323, 0.636] | 2245593         | T→G         | <i>ccmC</i>      | I239I     |              |
| 52.2                       | 0.416         | [0.276, 0.549] | 3360344         | A→C         | <i>smg</i>       | F9C       | C40K         |
| 52.1                       | 0.536         | [0.377, 0.689] | 866217          | T→G         | <i>yliE</i>      | N145K     |              |
| 52.1                       | 0.444         | [0.301, 0.588] | 1101690         | T→G         | <i>phoH</i>      | G138G     |              |
| 52.0                       | 0.316         | [0.203, 0.441] | 3384612         | G→T         | <i>gspD</i>      | G111W     |              |
| 51.9                       | 0.639         | [0.494, 0.771] | 3312435         | A→C         | <i>mdh/argR</i>  | -         |              |
| 51.8                       | 0.327         | [0.221, 0.452] | 4570266         | A→C         | <i>hpaB</i>      | C492G     | C40K         |
| 51.8                       | 0.393         | [0.258, 0.532] | 3743455         | T→G         | <i>waaO</i>      | T15P      | C40K         |
| 51.6                       | 0.286         | [0.181, 0.402] | 3103672         | G→A         | <i>ygiW</i>      | T59T      | C40K         |
| 51.6                       | 0.602         | [0.442, 0.739] | 1567831         | T→G         | <i>hipA</i>      | I305L     |              |
| 51.6                       | 0.392         | [0.261, 0.525] | 1642043         | A→C         | <i>ynfl</i>      | I115L     | C40K         |
| 51.5                       | 0.360         | [0.238, 0.487] | 4577252         | T→G         | <i>hpaD</i>      | Y17S      | C40K         |
| 51.5                       | 0.429         | [0.288, 0.578] | 3962760         | T→G         | ECB_03690        | E60D      | C40K         |
| 51.4                       | 0.491         | [0.329, 0.649] | 3630897         | A→C         | <i>ldrD/yhjV</i> | -         |              |
| 51.2                       | 0.447         | [0.302, 0.600] | 178875          | A→C         | <i>yadQ</i>      | A309A     |              |
| 51.1                       | 0.422         | [0.287, 0.579] | 1496171         | A→C         | <i>ansP/yncG</i> | -         | C40K         |
| 51.1                       | 0.622         | [0.465, 0.756] | 12527           | A→C         | <i>dnaK</i>      | M123L     |              |
| 50.7                       | 0.499         | [0.337, 0.664] | 2233990         | T→G         | <i>rplY/yejK</i> | -         |              |
| 50.7                       | 0.325         | [0.203, 0.450] | 1107001         | G→T         | <i>ycdS</i>      | S525*     | C40K         |
| 50.6                       | 0.271         | [0.182, 0.382] | 3766565         | A→C         | <i>gltS</i>      | F381L     |              |
| 50.5                       | 0.592         | [0.434, 0.744] | 2784792         | A→C         | <i>ygcR</i>      | A88A      |              |
| 50.4                       | 0.341         | [0.218, 0.478] | 1806589         | C→A         | <i>astD</i>      | V137V     | C40K         |
| 50.2                       | 0.661         | [0.526, 0.790] | 4474802         | T→G         | <i>idnT</i>      | V317V     |              |
| 50.2                       | 0.453         | [0.304, 0.612] | 1811352         | T→G         | <i>ydjX</i>      | L229L     |              |
| 50.2                       | 0.647         | [0.492, 0.771] | 2558035         | A→C         | <i>yfgK</i>      | I47M      |              |
| 50.2                       | 0.477         | [0.320, 0.637] | 1120708         | T→G         | <i>ymdB</i>      | L107R     |              |
| 50.1                       | 0.365         | [0.242, 0.494] | 543845          | T→G         | <i>ybcM</i>      | Y168D     |              |
| 50.0                       | 0.564         | [0.411, 0.724] | 4203274         | A→C         | <i>metH</i>      | E172D     |              |
| 50.0                       | 0.521         | [0.365, 0.679] | 911501          | G→T         | <i>potF</i>      | P337P     |              |
| 50.0                       | 0.475         | [0.318, 0.622] | 3123757         | A→C         | <i>yqil</i>      | Y97S      | C40K         |
| 49.9                       | 0.443         | [0.302, 0.600] | 3487874         | A→C         | <i>rtcR</i>      | Q336P     |              |
| 49.9                       | 0.352         | [0.230, 0.474] | 1311136         | A→C         | <i>yciC</i>      | F41C      |              |
| 49.8                       | 0.593         | [0.422, 0.731] | 1035674         | A→C         | <i>ycbG</i>      | E33D      |              |
| 49.8                       | 0.453         | [0.301, 0.599] | 4564414         | A→C         | <i>hsdR</i>      | L108R     |              |
| 49.7                       | 0.200         | [0.135, 0.283] | 2765159         | T→G         | <i>ygbO</i>      | E336A     |              |
| 49.7                       | 0.415         | [0.282, 0.567] | 4089838         | A→C         | <i>cdh</i>       | I143L     |              |
| 49.6                       | 0.509         | [0.339, 0.686] | 1378904         | T→G         | <i>ycjU</i>      | L130R     |              |
| 49.5                       | 0.614         | [0.456, 0.758] | 1886192         | A→C         | <i>yobF/yebO</i> | -         | C40K         |
| 49.4                       | 0.423         | [0.282, 0.579] | 4512147         | A→C         | <i>sgcX/yjhP</i> | -         |              |
| 49.4                       | 0.580         | [0.421, 0.722] | 440160          | A→C         | <i>cof</i>       | I228L     |              |
| 49.4                       | 0.439         | [0.296, 0.600] | 728010          | T→G         | <i>abrB</i>      | N182T     | C40K         |
| 49.3                       | 0.464         | [0.313, 0.624] | 67987           | T→G         | <i>polB</i>      | S200R     |              |
| 49.2                       | 0.438         | [0.290, 0.590] | 3911660         | A→C         | <i>yifB</i>      | L47*      | C40K         |
| 49.0                       | 0.532         | [0.359, 0.692] | 2070174         | A→C         | <i>wza</i>       | V92V      |              |
| 48.9                       | 0.664         | [0.533, 0.795] | 2268244         | A→C         | <i>atoS</i>      | K501T     |              |
| 48.9                       | 0.666         | [0.521, 0.793] | 4506667         | T→G         | <i>sgcR</i>      | V120V     |              |
| 48.8                       | 0.341         | [0.217, 0.457] | 4202793         | T→G         | <i>metH</i>      | L12*      |              |
| 48.8                       | 0.439         | [0.290, 0.590] | 3272110         | A→C         | <i>yrbA/yrbB</i> | -         | C40K         |
| 48.7                       | 0.579         | [0.410, 0.729] | 4204308         | A→C         | <i>metH</i>      | E517A     |              |
| 48.7                       | 0.637         | [0.483, 0.766] | 1360208         | A→C         | <i>ycjL</i>      | I241L     |              |
| 48.7                       | 0.574         | [0.410, 0.732] | 1992661         | A→C         | <i>shiA</i>      | Q340H     |              |
| 48.5                       | 0.438         | [0.288, 0.589] | 1791600         | A→C         | <i>katE</i>      | N157H     |              |
| 48.5                       | 0.459         | [0.312, 0.625] | 1822771         | A→C         | <i>topB</i>      | L473W     |              |
| 48.5                       | 0.425         | [0.283, 0.579] | 1847878         | A→C         | <i>yeal</i>      | N89H      |              |
| 48.5                       | 0.236         | [0.153, 0.334] | 4534381         | T→G         | <i>uxuB</i>      | R189R     | C40K         |

**Table S7 | SNPs predicted in 40K mixed-population sample**

| <b>-log<sub>10</sub> E</b> | <b>fr new</b> | <b>95% CL</b>  | <b>position</b> | <b>base</b> | <b>gene</b>      | <b>aa</b> | <b>notes</b> |
|----------------------------|---------------|----------------|-----------------|-------------|------------------|-----------|--------------|
| 48.5                       | 0.417         | [0.276, 0.568] | 2422436         | T→G         | <i>yfdE</i>      | L320F     | C40K         |
| 48.3                       | 0.311         | [0.200, 0.454] | 289049          | C→A         | <i>ykgA</i>      | G246W     | C40K         |
| 48.2                       | 0.390         | [0.258, 0.540] | 816306          | T→G         | <i>ybhO</i>      | Y20S      | C40K         |
| 48.0                       | 0.617         | [0.455, 0.757] | 934017          | T→G         | <i>ybjD</i>      | L280W     |              |
| 47.9                       | 0.564         | [0.396, 0.730] | 2794464         | A→C         | <i>ygcF/ygcG</i> | –         |              |
| 47.9                       | 0.430         | [0.287, 0.568] | 1812465         | T→G         | <i>ydjZ</i>      | Y144D     |              |
| 47.7                       | 0.510         | [0.344, 0.683] | 1665858         | A→C         | <i>manA</i>      | S30R      |              |
| 47.7                       | 0.276         | [0.180, 0.390] | 3470129         | T→G         | <i>feoB</i>      | L353R     | C40K         |
| 47.5                       | 0.467         | [0.307, 0.627] | 731342          | T→G         | <i>ybgQ</i>      | E540A     | C40K         |
| 47.4                       | 0.606         | [0.455, 0.750] | 3208531         | A→C         | <i>garD</i>      | K107N     |              |
| 47.3                       | 0.360         | [0.234, 0.496] | 4562591         | T→G         | <i>hsdR</i>      | T716P     | C40K         |
| 47.2                       | 0.524         | [0.337, 0.693] | 1754129         | A→C         | <i>ydiF</i>      | T425T     |              |
| 47.1                       | 0.256         | [0.166, 0.365] | 3105742         | A→C         | <i>ygiY</i>      | N363H     |              |
| 47.0                       | 0.477         | [0.320, 0.635] | 2230229         | A→C         | <i>bcr</i>       | Y240*     |              |
| 46.9                       | 0.415         | [0.270, 0.569] | 1913540         | A→C         | <i>zwf</i>       | S451A     | C40K         |
| 46.9                       | 0.340         | [0.220, 0.464] | 3243698         | A→C         | <i>nlpl</i>      | L154R     | C40K         |
| 46.8                       | 0.604         | [0.444, 0.751] | 1555329         | T→G         | <i>ydeN</i>      | K383Q     |              |
| 46.7                       | 0.410         | [0.271, 0.569] | 4070746         | T→G         | <i>frvA</i>      | V75V      | C40K         |
| 46.7                       | 0.513         | [0.335, 0.692] | 3965377         | A→C         | ECB_03693        | F65C      |              |
| 46.7                       | 0.520         | [0.335, 0.692] | 3696775         | A→C         | <i>yibF/rhsA</i> | –         |              |
| 46.6                       | 0.445         | [0.296, 0.601] | 2952759         | T→G         | <i>ygfl</i>      | N56H      |              |
| 46.5                       | 0.187         | [0.123, 0.264] | 2761930         | T→G         | <i>rpoS</i>      | Q161H     |              |
| 46.3                       | 0.514         | [0.345, 0.682] | 1392392         | A→C         | <i>mppA</i>      | E266A     |              |
| 46.3                       | 0.472         | [0.320, 0.636] | 1394855         | T→G         | <i>ydaA</i>      | E313A     |              |
| 46.3                       | 0.535         | [0.351, 0.704] | 970635          | T→G         | <i>pflB</i>      | N5H       | C40K         |
| 46.3                       | 0.424         | [0.282, 0.579] | 92372           | T→G         | <i>fruR/yabB</i> | –         |              |
| 46.1                       | 0.268         | [0.178, 0.386] | 3992619         | T→G         | ECB_03721        | K177T     | C40K         |
| 46.1                       | 0.387         | [0.252, 0.537] | 2858322         | T→G         | <i>ppdB</i>      | E5A       | C40K         |
| 46.0                       | 0.582         | [0.432, 0.727] | 2864911         | C→A         | <i>mutH</i>      | G210G     | C40K         |
| 45.9                       | 0.418         | [0.277, 0.580] | 576388          | A→C         | <i>cusR/cusC</i> | –         | C40K         |
| 45.8                       | 0.462         | [0.306, 0.627] | 1405097         | T→G         | <i>ydaM/ydaN</i> | –         |              |
| 45.8                       | 0.555         | [0.381, 0.721] | 2441578         | A→C         | <i>ypdG</i>      | M181R     |              |
| 45.7                       | 0.254         | [0.167, 0.361] | 3333476         | A→C         | <i>accB</i>      | A50A      |              |
| 45.6                       | 0.503         | [0.330, 0.671] | 2222411         | T→G         | <i>rtn</i>       | N166K     | C40K         |
| 45.6                       | 0.346         | [0.225, 0.482] | 1661682         | T→G         | <i>tus</i>       | L77V      | C40K         |
| 45.6                       | 0.382         | [0.253, 0.530] | 4367301         | A→C         | <i>yjeP</i>      | N75K      |              |
| 45.6                       | 0.383         | [0.246, 0.529] | 4547935         | T→G         | <i>yjiN</i>      | I76L      | C40K         |
| 45.5                       | 0.325         | [0.216, 0.457] | 1388180         | T→G         | <i>ycjG</i>      | S294R     | C40K         |
| 45.5                       | 0.504         | [0.329, 0.671] | 3236743         | A→C         | <i>yhbU</i>      | N9H       | C40K         |
| 45.5                       | 0.346         | [0.220, 0.475] | 731494          | T→G         | <i>ybgQ</i>      | P489P     | C40K         |
| 45.4                       | 0.606         | [0.446, 0.759] | 1832346         | T→G         | <i>ydjG</i>      | L285F     |              |
| 45.3                       | 0.682         | [0.544, 0.805] | 918143          | A→C         | <i>artM</i>      | F33L      | C40K         |
| 45.3                       | 0.217         | [0.134, 0.321] | 3557298         | C→A         | <i>yhhJ</i>      | R65L      | C40K         |
| 45.2                       | 0.369         | [0.235, 0.512] | 3859873         | T→G         | <i>yieL</i>      | K367N     | C40K         |
| 45.2                       | 0.499         | [0.331, 0.672] | 788776          | A→C         | ECB_00726        | Y83D      |              |
| 45.1                       | 0.444         | [0.291, 0.601] | 1687839         | A→C         | <i>rnfG</i>      | K148Q     |              |
| 45.0                       | 0.301         | [0.196, 0.422] | 3658512         | T→G         | <i>xylB</i>      | K440Q     |              |
| 45.0                       | 0.429         | [0.289, 0.591] | 2306072         | A→C         | <i>yfaV</i>      | D198E     |              |
| 45.0                       | 0.329         | [0.217, 0.466] | 2441230         | A→C         | <i>ypdG</i>      | I297S     | C40K         |
| 44.9                       | 0.352         | [0.227, 0.494] | 1692302         | A→C         | <i>pdxY</i>      | M261R     | C40K         |
| 44.6                       | 0.365         | [0.236, 0.510] | 4446077         | T→G         | <i>nrdD/treC</i> | –         | C40K         |
| 44.6                       | 0.313         | [0.203, 0.433] | 3227037         | T→G         | <i>yraK</i>      | Y155D     | C40K         |
| 44.3                       | 0.578         | [0.410, 0.724] | 4455831         | C→A         | <i>pyrL/yjgH</i> | –         |              |
| 44.3                       | 0.515         | [0.330, 0.699] | 3813583         | A→C         | <i>ivbL/emrD</i> | –         |              |
| 44.3                       | 0.580         | [0.409, 0.730] | 940678          | C→T         | <i>clpA</i>      | P189L     | C40K         |
| 44.2                       | 0.489         | [0.321, 0.657] | 4493724         | A→C         | <i>yis1</i>      | L84*      |              |

**Table S7 | SNPs predicted in 40K mixed-population sample**

| <b>-log<sub>10</sub> E</b> | <b>fr new</b> | <b>95% CL</b>  | <b>position</b> | <b>base</b> | <b>gene</b>                   | <b>aa</b> | <b>notes</b> |
|----------------------------|---------------|----------------|-----------------|-------------|-------------------------------|-----------|--------------|
| 44.2                       | 0.446         | [0.285, 0.602] | 1712380         | A→C         | <i>vdhO</i>                   | E251A     |              |
| 44.2                       | 0.288         | [0.190, 0.417] | 4526771         | A→C         | <i>fimD</i>                   | I254I     | C40K         |
| 44.1                       | 0.531         | [0.352, 0.702] | 1791045         | A→C         | <i>cedA/katE</i>              | -         |              |
| 44.0                       | 0.650         | [0.502, 0.778] | 35850           | A→C         | <i>carB</i>                   | K321N     | C40K         |
| 44.0                       | 0.316         | [0.203, 0.441] | 3623554         | A→C         | <i>yhjO</i>                   | F392C     |              |
| 43.9                       | 0.356         | [0.231, 0.502] | 1176345         | T→G         | <i>fhuE/ycfF</i>              | -         |              |
| 43.8                       | 0.290         | [0.183, 0.406] | 4601064         | A→C         | <i>osmY</i>                   | K145N     | C40K         |
| 43.8                       | 0.369         | [0.240, 0.520] | 1756840         | A→C         | <i>ydiP/ydiQ</i>              | -         | C40K         |
| 43.7                       | 0.348         | [0.223, 0.486] | 2419950         | T→G         | <i>evgS</i>                   | D450E     |              |
| 43.7                       | 0.399         | [0.256, 0.557] | 4029063         | A→C         | <i>yihA/yihI</i>              | -         | C40K         |
| 43.4                       | 0.357         | [0.231, 0.502] | 3081137         | T→G         | <i>yghXY</i>                  | Y218S     |              |
| 43.2                       | 0.379         | [0.249, 0.515] | 2320133         | A→C         | <i>pmrD/menE</i>              | -         | C40K         |
| 43.1                       | 0.391         | [0.254, 0.531] | 2988792         | T→G         | <i>mutY</i>                   | L40W      | C40K         |
| 42.9                       | 0.379         | [0.239, 0.527] | 3404580         | T→G         | <i>fkpA</i>                   | K249Q     | C40K         |
| 42.6                       | 0.339         | [0.221, 0.487] | 2873513         | T→G         | <i>lysA</i>                   | H3P       |              |
| 42.4                       | 0.441         | [0.285, 0.604] | 2850878         | A→C         | <i>ptr</i>                    | L876V     |              |
| 42.3                       | 0.432         | [0.282, 0.593] | 1829798         | A→C         | <i>pncA/ydjE</i>              | -         | C40K         |
| 42.1                       | 0.408         | [0.263, 0.558] | 1112671         | A→C         | <i>ycdW</i>                   | K73Q      |              |
| 42.1                       | 0.427         | [0.269, 0.581] | 2466526         | A→C         | <i>yfeS</i>                   | I18L      |              |
| 42.0                       | 0.452         | [0.306, 0.627] | 1724002         | T→G         | <i>ydhR</i>                   | N12K      |              |
| 41.8                       | 0.377         | [0.246, 0.529] | 3865067         | A→C         | <i>bgfF</i>                   | F300C     | C40K         |
| 41.8                       | 0.270         | [0.172, 0.391] | 1649169         | T→G         | <i>ydgD</i>                   | I5M       | C40K         |
| 41.7                       | 0.440         | [0.294, 0.603] | 4404811         | T→G         | <i>rplI/ECB_04071</i>         | -         | C40K         |
| 41.5                       | 0.332         | [0.218, 0.479] | 1880102         | A→C         | <i>yoaE</i>                   | I21M      | C40K         |
| 41.5                       | 0.431         | [0.277, 0.592] | 3121407         | A→C         | <i>yqiG</i>                   | D392A     | C40K         |
| 41.5                       | 0.423         | [0.270, 0.579] | 1794984         | T→G         | <i>celF</i>                   | Y261S     | C40K         |
| 41.4                       | 0.606         | [0.446, 0.758] | 598442          | T→G         | <i>entF</i>                   | V526V     |              |
| 41.4                       | 0.187         | [0.115, 0.273] | 2717916         | A→C         | <i>recA</i>                   | V238G     |              |
| 41.2                       | 0.355         | [0.225, 0.500] | 1902841         | A→C         | <i>yebZ</i>                   | L109L     | C40K         |
| 41.2                       | 0.351         | [0.229, 0.509] | 332980          | T→G         | <i>cynX</i>                   | W145G     | C40K         |
| 41.2                       | 0.600         | [0.421, 0.762] | 3252768         | T→G         | <i>nusA/yhbC</i>              | -         | C40K         |
| 41.1                       | 0.295         | [0.183, 0.420] | 4237773         | T→G         | <i>dinF</i>                   | L367R     |              |
| 41.0                       | 0.498         | [0.329, 0.671] | 3956032         | T→G         | <i>yzcX/yifL</i>              | -         |              |
| 40.9                       | 0.262         | [0.167, 0.382] | 3541981         | A→C         | <i>yhhS</i>                   | H147Q     | C40K         |
| 40.9                       | 0.390         | [0.251, 0.547] | 4530188         | A→C         | <i>fimH</i>                   | N156T     | C40K         |
| 40.8                       | 0.275         | [0.176, 0.390] | 4166668         | A→C         | <i>rpoC</i>                   | K570Q     | C40K         |
| 40.7                       | 0.434         | [0.271, 0.593] | 4143491         | T→G         | <i>trmA/btuB</i>              | -         |              |
| 40.7                       | 0.313         | [0.196, 0.445] | 1633778         | A→C         | <i>speG</i>                   | I134L     | C40K         |
| 40.6                       | 0.414         | [0.263, 0.569] | 2414848         | A→C         | <i>dsdA/emrY</i>              | -         |              |
| 40.6                       | 0.324         | [0.210, 0.464] | 1228779         | T→G         | <i>ycgM</i>                   | F180L     | C40K         |
| 40.5                       | 0.375         | [0.239, 0.527] | 597017          | A→C         | <i>entF</i>                   | G51G      | C40K         |
| 40.3                       | 0.644         | [0.469, 0.779] | 494082          | A→C         | <i>ybbP</i>                   | E500A     |              |
| 40.2                       | 0.479         | [0.308, 0.665] | 1761548         | A→C         | <i>ydiD</i>                   | D435A     | C40K         |
| 40.1                       | 0.267         | [0.161, 0.411] | 4046902         | G→T         | <i>yihQ</i>                   | P199Q     |              |
| 40.1                       | 0.464         | [0.297, 0.652] | 516413          | T→G         | <i>allC</i>                   | Y349S     | C40K         |
| 40.0                       | 0.579         | [0.394, 0.738] | 2239729         | A→C         | <i>yejO</i>                   | A120A     |              |
| 40.0                       | 0.585         | [0.407, 0.748] | 3023893         | T→G         | <i>ECB_02822/<br/>insB-22</i> | -         | C40K         |
| 40.0                       | 0.683         | [0.531, 0.810] | 651095          | T→G         | <i>ybeA</i>                   | I69L      |              |
| 40.0                       | 0.431         | [0.278, 0.604] | 2511731         | A→C         | <i>acrD/yffB</i>              | -         |              |
| 39.9                       | 0.457         | [0.294, 0.632] | 2155555         | T→G         | <i>yehK/yehL</i>              | -         |              |
| 39.7                       | 0.600         | [0.422, 0.754] | 2858895         | A→C         | <i>ppdA/thyA</i>              | -         |              |
| 39.6                       | 0.350         | [0.216, 0.497] | 679893          | A→C         | <i>asnB</i>                   | S460R     |              |
| 39.6                       | 0.329         | [0.207, 0.467] | 4180045         | A→C         | <i>hupA</i>                   | K51N      | C40K         |
| 39.6                       | 0.298         | [0.187, 0.433] | 1252845         | T→G         | <i>dhaR</i>                   | Y544D     | C40K         |
| 39.4                       | 0.380         | [0.238, 0.535] | 39986           | T→G         | <i>caiD</i>                   | N160T     |              |
| 39.4                       | 0.238         | [0.147, 0.342] | 3231794         | A→C         | <i>yraP</i>                   | E51A      |              |

**Table S7 | SNPs predicted in 40K mixed-population sample**

| <b>-log<sub>10</sub> E</b> | <b>fr new</b> | <b>95% CL</b>  | <b>position</b> | <b>base</b> | <b>gene</b>             | <b>aa</b> | <b>notes</b> |
|----------------------------|---------------|----------------|-----------------|-------------|-------------------------|-----------|--------------|
| 39.3                       | 0.427         | [0.272, 0.592] | 653483          | A→C         | <i>holA</i>             | L236R     |              |
| 39.3                       | 0.658         | [0.501, 0.795] | 256579          | T→G         | <i>yafN</i>             | I4M       |              |
| 39.1                       | 0.249         | [0.143, 0.373] | 3713828         | G→T         | ECB_03460               | G280*     | C40K         |
| 39.0                       | 0.248         | [0.155, 0.366] | 4058501         | T→G         | <i>fdhE</i>             | E292A     | C40K         |
| 39.0                       | 0.295         | [0.175, 0.440] | 3984539         | G→T         | ECB_03713               | P117Q     | C40K         |
| 38.7                       | 0.466         | [0.289, 0.634] | 3776874         | A→C         | ECB_03516/<br>ECB_03517 | -         |              |
| 38.7                       | 0.250         | [0.149, 0.375] | 2914384         | G→T         | <i>ygfS</i>             | A76D      | C40K         |
| 38.4                       | 0.271         | [0.171, 0.397] | 510546          | T→G         | <i>allP</i>             | F250V     |              |
| 38.4                       | 0.351         | [0.216, 0.497] | 1280272         | A→C         | <i>narG</i>             | N87H      |              |
| 38.0                       | 0.264         | [0.170, 0.380] | 4466781         | T→G         | <i>valS</i>             | E30D      | C40K         |
| 37.9                       | 0.275         | [0.168, 0.391] | 540028          | A→C         | <i>renD</i>             | E26A      | C40K         |
| 37.9                       | 0.343         | [0.219, 0.492] | 4142501         | T→G         | <i>trmA</i>             | K211Q     | C40K         |
| 37.8                       | 0.448         | [0.277, 0.624] | 2404817         | A→C         | <i>yfcZ/fadL</i>        | -         |              |
| 37.7                       | 0.336         | [0.218, 0.475] | 2497928         | T→G         | <i>maeB</i>             | K426N     | C40K         |
| 37.7                       | 0.443         | [0.279, 0.619] | 828820          | T→G         | <i>ybiB</i>             | V316V     | C40K         |
| 37.5                       | 0.371         | [0.232, 0.526] | 3781098         | T→G         | ECB_03520               | M377R     | C40K         |
| 37.4                       | 0.556         | [0.359, 0.732] | 3788555         | A→C         | ECB_03531               | G105G     |              |
| 37.4                       | 0.395         | [0.247, 0.559] | 1419306         | T→G         | <i>trkG</i>             | C215W     | C40K         |
| 37.2                       | 0.309         | [0.191, 0.448] | 3611119         | A→C         | <i>yhjJ</i>             | I105S     |              |
| 37.2                       | 0.641         | [0.472, 0.789] | 313891          | A→C         | <i>yahJ</i>             | N40H      |              |
| 37.1                       | 0.630         | [0.477, 0.769] | 2450699         | C→A         | <i>yfeA</i>             | E4*       |              |
| 37.1                       | 0.309         | [0.188, 0.441] | 3976831         | T→G         | <i>metR</i>             | E138A     | C40K         |
| 37.0                       | 0.331         | [0.206, 0.467] | 2966498         | T→G         | <i>tktA</i>             | K297Q     |              |
| 36.8                       | 0.354         | [0.217, 0.496] | 212537          | T→G         | <i>ldcC</i>             | I6S       | C40K         |
| 36.8                       | 0.325         | [0.206, 0.457] | 2817492         | T→G         | <i>sdaC</i>             | I112S     | C40K         |
| 36.5                       | 0.251         | [0.155, 0.365] | 842160          | A→C         | <i>ybiF</i>             | L188*     | C40K         |
| 36.4                       | 0.265         | [0.157, 0.381] | 2833119         | T→G         | <i>fucK</i>             | L355V     |              |
| 36.4                       | 0.471         | [0.291, 0.653] | 3775466         | T→G         | <i>selC</i> /ECB_03516  | -         |              |
| 36.3                       | 0.344         | [0.212, 0.489] | 3507177         | A→C         | <i>gntU</i>             | S446R     | C40K         |
| 36.3                       | 0.619         | [0.422, 0.772] | 2699368         | T→G         | <i>nrdF/proV</i>        | -         |              |
| 36.2                       | 0.415         | [0.256, 0.579] | 506450          | T→G         | <i>gcl</i>              | A123A     | C40K         |
| 36.1                       | 0.358         | [0.219, 0.513] | 3303353         | A→C         | <i>dcuD</i>             | Y196S     | C40K         |
| 35.9                       | 0.380         | [0.231, 0.535] | 379334          | T→G         | <i>yajF</i>             | N256K     | C40K         |
| 35.9                       | 0.410         | [0.256, 0.569] | 152863          | T→G         | <i>yadC</i>             | N334T     |              |
| 35.9                       | 0.388         | [0.244, 0.546] | 1767478         | T→G         | <i>ydiU</i>             | L345L     | C40K         |
| 35.7                       | 0.696         | [0.543, 0.824] | 4396603         | A→C         | <i>yjfQ</i>             | T2T       |              |
| 35.5                       | 0.708         | [0.539, 0.828] | 1693534         | T→G         | <i>tyrS</i>             | K295Q     |              |
| 35.4                       | 0.454         | [0.293, 0.631] | 3051023         | A→C         | <i>glcG</i>             | V34G      |              |
| 35.3                       | 0.395         | [0.248, 0.568] | 2705690         | A→C         | <i>emrR</i>             | D21A      | C40K         |
| 35.3                       | 0.336         | [0.197, 0.495] | 2537679         | G→T         | <i>yfgC</i>             | A256S     | C40K         |
| 35.2                       | 0.287         | [0.178, 0.421] | 172675          | T→G         | <i>fhuC</i>             | F19C      |              |
| 35.1                       | 0.333         | [0.213, 0.471] | 4262744         | A→C         | <i>actP</i>             | A364A     | C40K         |
| 35.1                       | 0.326         | [0.200, 0.464] | 3712483         | A→C         | ECB_03459               | K74Q      | C40K         |
| 34.9                       | 0.576         | [0.391, 0.755] | 231930          | T→G         | <i>aspU/dkgB</i>        | -         |              |
| 34.7                       | 0.274         | [0.170, 0.397] | 1693251         | T→G         | <i>tyrS</i>             | E389A     |              |
| 34.5                       | 0.600         | [0.422, 0.772] | 875009          | T→G         | <i>deoR</i>             | D93A      |              |
| 34.4                       | 0.171         | [0.099, 0.277] | 468017          | G→T         | <i>htpG</i>             | L277L     |              |
| 34.2                       | 0.285         | [0.165, 0.432] | 2063933         | C→A         | <i>wcaD</i>             | S51I      |              |
| 34.1                       | 0.258         | [0.154, 0.385] | 1557591         | A→C         | <i>ydeO</i>             | A16A      |              |
| 33.9                       | 0.422         | [0.264, 0.607] | 1977296         | T→G         | <i>yedX</i>             | N114K     | C40K         |
| 33.5                       | 0.317         | [0.192, 0.472] | 3822784         | A→C         | <i>glvBC</i>            | D420E     | C40K         |
| 33.3                       | 0.233         | [0.138, 0.349] | 2981152         | A→C         | <i>yggS</i>             | T102P     |              |
| 33.2                       | 0.398         | [0.240, 0.566] | 749853          | A→C         | <i>ybgG</i>             | I332L     | C40K         |
| 33.2                       | 0.565         | [0.353, 0.745] | 1298145         | T→G         | <i>yehE/oppA</i>        | -         |              |
| 33.2                       | 0.621         | [0.437, 0.790] | 2837245         | T→G         | <i>gcvA/ygdI</i>        | -         |              |
| 33.1                       | 0.553         | [0.352, 0.748] | 971637          | T→G         | <i>focA/ycaO</i>        | -         | C40K         |

**Table S7 | SNPs predicted in 40K mixed-population sample**

| <b>-log<sub>10</sub> E</b> | <b>fr new</b> | <b>95% CL</b>  | <b>position</b> | <b>base</b> | <b>gene</b>      | <b>aa</b> | <b>notes</b> |
|----------------------------|---------------|----------------|-----------------|-------------|------------------|-----------|--------------|
| 33.1                       | 0.346         | [0.209, 0.494] | 2003886         | A→C         | <i>cobU/yoeA</i> | -         |              |
| 33.0                       | 0.190         | [0.114, 0.279] | 4500312         | T→G         | <i>fecA</i>      | S466S     |              |
| 33.0                       | 0.255         | [0.150, 0.375] | 597391          | A→C         | <i>entF</i>      | D176A     |              |
| 33.0                       | 0.599         | [0.406, 0.774] | 3095365         | A→C         | <i>ygiQ/sufl</i> | -         |              |
| 32.9                       | 0.325         | [0.195, 0.480] | 1016770         | T→G         | <i>ycbS</i>      | I155S     | C40K         |
| 32.7                       | 0.303         | [0.179, 0.447] | 2480430         | A→C         | <i>amiA</i>      | Q187P     | C40K         |
| 32.5                       | 0.294         | [0.177, 0.447] | 405910          | C→A         | <i>yajO</i>      | R216R     | C40K         |
| 32.5                       | 0.241         | [0.133, 0.372] | 3003485         | C→A         | <i>yeeR</i>      | R319S     |              |
| 32.3                       | 0.203         | [0.121, 0.312] | 3748382         | T→G         | <i>coaD</i>      | V68G      | C40K         |
| 32.2                       | 0.354         | [0.197, 0.535] | 1004193         | C→A         | <i>ompF/asnS</i> | -         | C40K         |
| 32.0                       | 0.307         | [0.183, 0.454] | 1098758         | A→C         | <i>ycdO</i>      | E77D      | C40K         |
| 32.0                       | 0.128         | [0.078, 0.196] | 2746883         | T→G         | <i>hypC</i>      | F54V      |              |
| 31.9                       | 0.577         | [0.373, 0.756] | 2863851         | A→C         | <i>ygdP/mutH</i> | -         |              |
| 31.7                       | 0.331         | [0.196, 0.481] | 3561248         | A→C         | <i>yhil</i>      | L15V      | C40K         |
| 31.6                       | 0.364         | [0.218, 0.541] | 125630          | T→G         | <i>pdhR</i>      | S245S     | C40K         |
| 31.6                       | 0.260         | [0.155, 0.397] | 4055073         | A→C         | <i>rbn</i>       | I261L     |              |
| 31.6                       | 0.363         | [0.211, 0.529] | 2127664         | A→C         | <i>gatB</i>      | I88S      | C40K         |
| 31.5                       | 0.302         | [0.178, 0.436] | 735533          | T→G         | <i>gltA/sdhC</i> | -         | C40K         |
| 31.4                       | 0.291         | [0.171, 0.431] | 2360181         | A→C         | <i>pta</i>       | K615Q     | C40K         |
| 31.4                       | 0.345         | [0.208, 0.517] | 1975162         | T→G         | <i>yedV</i>      | K330N     | C40K         |
| 31.4                       | 0.112         | [0.068, 0.168] | 2742589         | A→C         | <i>hycC</i>      | L505V     |              |
| 31.3                       | 0.304         | [0.187, 0.463] | 3823644         | T→G         | <i>glvBC</i>     | K134Q     |              |
| 31.1                       | 0.244         | [0.146, 0.379] | 909616          | T→G         | <i>rimK/ybjN</i> | -         | C40K         |
| 31.0                       | 0.375         | [0.216, 0.541] | 4089472         | A→C         | <i>cdh</i>       | I21L      | C40K         |
| 31.0                       | 0.261         | [0.155, 0.397] | 2825941         | A→C         | ECB_02649        | L93R      | C40K         |
| 30.8                       | 0.286         | [0.168, 0.423] | 4236967         | A→C         | <i>dinF</i>      | K98N      |              |
| 30.6                       | 0.274         | [0.152, 0.419] | 1010683         | C→A         | <i>ssuB</i>      | P151P     |              |
| 30.5                       | 0.250         | [0.144, 0.373] | 482985          | T→G         | <i>copA</i>      | Q188P     |              |
| 30.4                       | 0.737         | [0.589, 0.852] | 3514291         | A→C         | <i>yhhZ</i>      | K326Q     |              |
| 30.4                       | 0.311         | [0.178, 0.457] | 1785895         | T→G         | <i>yniA</i>      | S279A     | C40K         |
| 30.1                       | 0.333         | [0.194, 0.482] | 4096930         | A→C         | <i>glpF</i>      | W215G     | C40K         |
| 30.0                       | 0.412         | [0.238, 0.594] | 714992          | A→C         | <i>ybfO</i>      | K343N     | C40K         |
| 29.8                       | 0.228         | [0.128, 0.338] | 4587518         | A→C         | <i>mdbB</i>      | D386E     |              |
| 29.6                       | 0.406         | [0.237, 0.595] | 4628873         | T→G         | <i>yjyY/lasT</i> | -         | C40K         |
| 29.5                       | 0.418         | [0.256, 0.594] | 3612954         | T→G         | <i>dctA/yhjK</i> | -         | C40K         |
| 29.4                       | 0.379         | [0.225, 0.553] | 640290          | T→G         | <i>ccbB</i>      | L77L      | C40K         |
| 29.3                       | 0.300         | [0.174, 0.450] | 2872152         | T→G         | <i>galR</i>      | P311P     | C40K         |
| 29.0                       | 0.273         | [0.156, 0.410] | 1349424         | T→G         | <i>fabI/ycjD</i> | -         |              |
| 29.0                       | 0.341         | [0.196, 0.514] | 235495          | T→G         | <i>yafE/mltD</i> | -         | C40K         |
| 29.0                       | 0.375         | [0.218, 0.540] | 3089831         | A→C         | <i>yqhD</i>      | K102T     | C40K         |
| 28.8                       | 0.713         | [0.555, 0.843] | 2168655         | A→C         | <i>yehY</i>      | L367R     |              |
| 28.8                       | 0.305         | [0.177, 0.458] | 1707834         | T→G         | <i>lhr</i>       | A518A     | C40K         |
| 28.7                       | 0.299         | [0.165, 0.465] | 475904          | C→A         | <i>fsr</i>       | G287V     | C40K         |
| 28.5                       | 0.407         | [0.237, 0.594] | 1292879         | A→C         | <i>hns/tak</i>   | -         |              |
| 28.5                       | 0.333         | [0.191, 0.503] | 1059834         | T→G         | <i>yccC</i>      | N490H     |              |
| 28.5                       | 0.258         | [0.147, 0.390] | 531409          | A→C         | <i>sfmC</i>      | N110H     |              |
| 28.4                       | 0.685         | [0.508, 0.832] | 1097604         | T→G         | <i>putP/ycdN</i> | -         |              |
| 28.3                       | 0.233         | [0.132, 0.355] | 2813416         | A→C         | <i>yqcC/syd</i>  | -         |              |
| 28.1                       | 0.300         | [0.178, 0.459] | 4414202         | A→C         | <i>fkIB</i>      | E90A      | C40K         |
| 28.1                       | 0.292         | [0.165, 0.433] | 2833343         | A→C         | <i>fucK</i>      | V429V     |              |
| 28.0                       | 0.370         | [0.215, 0.552] | 1540242         | A→C         | <i>yddV</i>      | I166M     |              |
| 27.9                       | 0.245         | [0.142, 0.378] | 2317986         | T→G         | <i>arnT</i>      | L189*     |              |
| 27.8                       | 0.244         | [0.141, 0.378] | 447819          | A→C         | <i>ybaY</i>      | N125T     |              |
| 27.7                       | 0.233         | [0.134, 0.352] | 2433065         | T→G         | <i>ypdA</i>      | L57R      |              |
| 27.7                       | 0.161         | [0.089, 0.263] | 4465015         | G→T         | <i>valS</i>      | A619E     |              |
| 27.7                       | 0.261         | [0.143, 0.412] | 492156          | C→A         | <i>ybbA</i>      | R86S      | C40K         |

**Table S7 | SNPs predicted in 40K mixed-population sample**

| <b>-log<sub>10</sub> E</b> | <b>fr new</b> | <b>95% CL</b>  | <b>position</b> | <b>base</b> | <b>gene</b>      | <b>aa</b> | <b>notes</b> |
|----------------------------|---------------|----------------|-----------------|-------------|------------------|-----------|--------------|
| 27.6                       | 0.370         | [0.215, 0.551] | 226275          | A→C         | <i>gmhB/rrsH</i> | -         | C40K         |
| 27.5                       | 0.280         | [0.156, 0.427] | 1599357         | A→C         | <i>ydfJ</i>      | I232M     |              |
| 27.4                       | 0.292         | [0.168, 0.453] | 1221347         | A→C         | <i>ycgH</i>      | -         |              |
| 27.4                       | 0.395         | [0.229, 0.580] | 1998939         | T→G         | <i>cbl/nac</i>   | -         | C40K         |
| 27.2                       | 0.214         | [0.123, 0.335] | 4397695         | T→G         | <i>yjfR</i>      | E29A      |              |
| 27.1                       | 0.433         | [0.244, 0.629] | 3046426         | T→G         | <i>yghJ/yghK</i> | -         |              |
| 27.1                       | 0.295         | [0.173, 0.450] | 582155          | A→C         | <i>cusA</i>      | K847Q     | C40K         |
| 26.9                       | 0.195         | [0.114, 0.306] | 81102           | A→C         | <i>setA</i>      | L226F     |              |
| 26.8                       | 0.247         | [0.139, 0.391] | 3083973         | T→G         | <i>yghA</i>      | L47R      |              |
| 26.5                       | 0.162         | [0.092, 0.249] | 3377468         | A→C         | <i>rpsC</i>      | R107R     |              |
| 26.5                       | 0.254         | [0.142, 0.396] | 4212457         | A→C         | <i>lysC/pgi</i>  | -         |              |
| 26.4                       | 0.283         | [0.160, 0.434] | 2911292         | A→C         | <i>ygfO</i>      | E396D     |              |
| 26.3                       | 0.373         | [0.217, 0.580] | 2582325         | A→C         | <i>iscS/iscR</i> | -         |              |
| 26.3                       | 0.246         | [0.139, 0.389] | 445446          | T→G         | <i>amtB</i>      | V138V     |              |
| 26.3                       | 0.482         | [0.278, 0.688] | 3027011         | T→G         | ECB_02827        | *220Y     | C40K         |
| 26.1                       | 0.612         | [0.406, 0.799] | 3792298         | A→C         | ECB_03532        | H135P     | C40K         |
| 26.0                       | 0.185         | [0.097, 0.310] | 4493211         | G→T         | <i>yis2</i>      | G142G     |              |
| 26.0                       | 0.386         | [0.228, 0.581] | 3313358         | A→C         | <i>argR/yhcN</i> | -         |              |
| 25.9                       | 0.199         | [0.106, 0.319] | 1509892         | G→T         | <i>yddE</i>      | -         |              |
| 25.7                       | 0.235         | [0.130, 0.365] | 662133          | T→G         | <i>hscC</i>      | E349D     |              |
| 25.7                       | 0.234         | [0.130, 0.365] | 876767          | A→C         | <i>cmr</i>       | A181A     | C40K         |
| 25.4                       | 0.278         | [0.158, 0.434] | 2028307         | T→G         | <i>wzzB/ugd</i>  | -         | C40K         |
| 25.3                       | 0.231         | [0.130, 0.365] | 2160319         | A→C         | <i>yehQ</i>      | L8F       |              |
| 25.0                       | 0.268         | [0.148, 0.428] | 1541538         | T→G         | <i>yddW</i>      | T413P     | C40K         |
| 25.0                       | 0.187         | [0.106, 0.293] | 4286188         | A→C         | <i>alsK</i>      | F145C     |              |
| 25.0                       | 0.209         | [0.115, 0.327] | 4040455         | T→G         | <i>yihM/yihN</i> | -         |              |
| 24.8                       | 0.243         | [0.139, 0.372] | 2899609         | A→C         | <i>yqeB</i>      | I129S     |              |
| 24.8                       | 0.418         | [0.230, 0.634] | 690209          | T→G         | <i>glnS/ybfM</i> | -         | C40K         |
| 24.7                       | 0.209         | [0.115, 0.328] | 2158593         | T→G         | <i>yehM</i>      | F568C     |              |
| 24.7                       | 0.234         | [0.128, 0.364] | 3217222         | A→C         | <i>agaS</i>      | Y5S       | C40K         |
| 24.6                       | 0.690         | [0.508, 0.832] | 2989164         | T→G         | <i>mutY</i>      | L164*     |              |
| 24.6                       | 0.195         | [0.111, 0.307] | 814339          | A→C         | <i>ybhN</i>      | V262G     |              |
| 24.3                       | 0.264         | [0.143, 0.411] | 1886806         | T→G         | <i>yobF/yebO</i> | -         | C40K         |
| 24.3                       | 0.312         | [0.170, 0.476] | 330492          | T→G         | <i>cynR</i>      | K252T     | C40K         |
| 24.2                       | 0.403         | [0.234, 0.612] | 1520150         | T→G         | <i>yddL</i>      | V10V      | C40K         |
| 24.1                       | 0.177         | [0.097, 0.282] | 320390          | T→G         | <i>prpR</i>      | Y235S     |              |
| 24.1                       | 0.250         | [0.147, 0.383] | 3969200         | T→G         | <i>yigl/pldA</i> | -         | C40K         |
| 24.1                       | 0.294         | [0.149, 0.450] | 3089302         | G→T         | <i>yqhC</i>      | A30E      |              |
| 24.0                       | 0.205         | [0.114, 0.316] | 4337791         | T→G         | <i>cadB</i>      | K321Q     |              |
| 23.9                       | 0.189         | [0.105, 0.293] | 109022          | A→C         | <i>ftsZ</i>      | E305A     |              |
| 23.8                       | 0.245         | [0.131, 0.382] | 3506469         | A→C         | <i>asd/yhgN</i>  | -         | C40K         |
| 23.7                       | 0.729         | [0.560, 0.863] | 2070879         | T→G         | <i>wza/yegH</i>  | -         |              |
| 23.6                       | 0.223         | [0.123, 0.349] | 128976          | A→C         | <i>aceF</i>      | I160L     |              |
| 23.6                       | 0.430         | [0.233, 0.631] | 3528587         | A→C         | <i>livK/yhhK</i> | -         | C40K         |
| 23.2                       | 0.218         | [0.118, 0.337] | 3309945         | A→C         | <i>degQ</i>      | K435N     |              |
| 23.2                       | 0.192         | [0.103, 0.308] | 1563306         | T→G         | <i>ydeT</i>      | Q216P     |              |
| 22.9                       | 0.212         | [0.110, 0.329] | 1538945         | T→G         | <i>dos</i>       | M243L     |              |
| 22.8                       | 0.202         | [0.107, 0.323] | 3993794         | A→C         | ECB_03722        | F3L       |              |
| 22.8                       | 0.267         | [0.150, 0.417] | 4089879         | A→C         | <i>cdh</i>       | K156N     | C40K         |
| 22.6                       | 0.197         | [0.101, 0.342] | 94003           | G→T         | <i>ftsL</i>      | T56T      | C40K         |
| 22.4                       | 0.247         | [0.130, 0.382] | 2179354         | A→C         | <i>yohGH</i>     | I191S     |              |
| 22.4                       | 0.303         | [0.170, 0.477] | 2511681         | T→G         | <i>acrD/yffB</i> | -         | C40K         |
| 22.3                       | 0.269         | [0.151, 0.419] | 3738290         | T→G         | <i>waaV</i>      | Y189S     |              |
| 22.0                       | 0.381         | [0.204, 0.579] | 3253256         | A→C         | <i>yhbC/metZ</i> | -         | C40K         |
| 22.0                       | 0.645         | [0.454, 0.809] | 1836496         | C→A         | <i>ydjK</i>      | L321L     |              |
| 21.8                       | 0.437         | [0.233, 0.657] | 541954          | T→G         | <i>ybcK</i>      | I388S     |              |



**Table S7 | SNPs predicted in 40K mixed-population sample**

| <b>-log<sub>10</sub> E</b> | <b>fr new</b> | <b>95% CL</b>  | <b>position</b> | <b>base</b> | <b>gene</b>      | <b>aa</b> | <b>notes</b> |
|----------------------------|---------------|----------------|-----------------|-------------|------------------|-----------|--------------|
| 21.8                       | 0.350         | [0.185, 0.532] | 3397769         | T→G         | <i>chiA/tuf</i>  | -         |              |
| 21.6                       | 0.236         | [0.126, 0.389] | 1243473         | A→C         | <i>mltE</i>      | A48A      | C40K         |
| 21.6                       | 0.172         | [0.095, 0.289] | 39023           | T→G         | <i>caiE</i>      | E181D     |              |
| 21.5                       | 0.205         | [0.110, 0.328] | 3043941         | T→G         | <i>yghJ</i>      | D688A     | C40K         |
| 21.5                       | 0.165         | [0.082, 0.281] | 2629329         | G→T         | <i>rseB</i>      | R307S     | C40K         |
| 21.3                       | 0.247         | [0.129, 0.381] | 3498495         | A→C         | <i>glgA</i>      | D331E     | C40K         |
| 21.3                       | 0.272         | [0.146, 0.439] | 4248845         | T→G         | <i>aphA</i>      | F167C     | C40K         |
| 21.1                       | 0.448         | [0.244, 0.653] | 2909993         | T→G         | <i>xdhD/ygfO</i> | -         | C40K         |
| 21.0                       | 0.223         | [0.115, 0.360] | 4249870         | A→C         | <i>yjbR</i>      | Y94S      |              |
| 21.0                       | 0.232         | [0.123, 0.380] | 3188042         | T→G         | <i>yhaK</i>      | L231V     | C40K         |
| 20.9                       | 0.219         | [0.105, 0.378] | 747520          | G→T         | <i>hrsA</i>      | V219F     |              |
| 20.9                       | 0.269         | [0.143, 0.429] | 3178868         | A→C         | <i>exuT</i>      | N244T     | C40K         |
| 20.9                       | 0.149         | [0.074, 0.261] | 83321           | G→T         | <i>leuC</i>      | G116G     |              |
| 20.8                       | 0.585         | [0.337, 0.800] | 3583174         | A→C         | <i>yhiS</i>      | L398F     |              |
| 20.8                       | 0.767         | [0.623, 0.881] | 3581085         | T→G         | <i>arsC</i>      | I53M      |              |
| 20.7                       | 0.176         | [0.094, 0.285] | 4424221         | T→G         | <i>ytfL</i>      | E251A     |              |
| 20.5                       | 0.199         | [0.105, 0.318] | 493795          | T→G         | <i>ybbP</i>      | L404L     | C40K         |
| 20.5                       | 0.214         | [0.112, 0.354] | 2149904         | T→G         | <i>molR</i>      | L745*     |              |
| 20.4                       | 0.253         | [0.135, 0.412] | 1532839         | A→C         | <i>yddP</i>      | G39G      | C40K         |
| 20.1                       | 0.312         | [0.173, 0.471] | 411430          | T→G         | <i>thiI/thiJ</i> | -         | C40K         |
| 19.9                       | 0.167         | [0.090, 0.277] | 1922855         | A→C         | <i>znuB/ruvB</i> | -         |              |
| 19.2                       | 0.153         | [0.079, 0.249] | 604005          | A→C         | <i>fepD</i>      | I298S     |              |
| 19.2                       | 0.218         | [0.113, 0.355] | 3461005         | A→C         | <i>yhgE</i>      | I40S      |              |
| 19.0                       | 0.281         | [0.151, 0.449] | 1803438         | A→C         | <i>astE</i>      | Y251D     | C40K         |
| 18.7                       | 0.207         | [0.104, 0.331] | 4292123         | A→C         | <i>rpiR/rpiB</i> | -         | C40K         |
| 18.6                       | 0.275         | [0.137, 0.440] | 910282          | T→G         | <i>ybiN/potF</i> | -         |              |
| 18.5                       | 0.247         | [0.123, 0.403] | 3303212         | T→G         | <i>dcuD</i>      | L149R     | C40K         |
| 18.5                       | 0.227         | [0.115, 0.380] | 2702200         | A→C         | <i>proX</i>      | E106A     |              |
| 18.5                       | 0.134         | [0.069, 0.232] | 2436881         | A→C         | <i>ypdD</i>      | I610M     |              |
| 18.3                       | 0.161         | [0.082, 0.267] | 4205306         | T→G         | <i>metH</i>      | Y850D     |              |
| 18.3                       | 0.187         | [0.098, 0.314] | 2323662         | A→C         | <i>yfbB</i>      | Y148*     | C40K         |
| 18.2                       | 0.226         | [0.115, 0.379] | 1463096         | A→C         | <i>trg</i>       | D173A     | C40K         |
| 18.1                       | 0.218         | [0.107, 0.357] | 1207988         | A→C         | <i>ycfC</i>      | Y5D       |              |
| 18.0                       | 0.233         | [0.115, 0.379] | 2166019         | T→G         | <i>yehU/yehV</i> | -         |              |
| 17.9                       | 0.174         | [0.089, 0.294] | 122923          | A→C         | <i>ampE</i>      | Y280S     |              |
| 17.9                       | 0.206         | [0.104, 0.350] | 4516225         | A→C         | <i>yjhr/yjhs</i> | -         |              |
| 17.9                       | 0.268         | [0.138, 0.441] | 835729          | A→C         | <i>ybiN</i>      | E258A     |              |
| 17.9                       | 0.154         | [0.078, 0.258] | 1391019         | A→C         | <i>ycjZ</i>      | E220D     |              |
| 17.8                       | 0.196         | [0.100, 0.319] | 1189161         | A→C         | <i>ycfT</i>      | L200L     |              |
| 17.8                       | 0.227         | [0.114, 0.379] | 2175153         | A→C         | <i>dld/pbpG</i>  | -         |              |
| 17.7                       | 0.188         | [0.095, 0.321] | 3717819         | T→G         | ECB_03460        | L1610R    |              |
| 17.4                       | 0.261         | [0.133, 0.431] | 2594074         | A→C         | <i>yphA</i>      | G34G      | C40K         |
| 17.3                       | 0.354         | [0.186, 0.559] | 3586500         | T→G         | <i>hdeD</i>      | D5E       |              |
| 17.3                       | 0.293         | [0.142, 0.480] | 2183839         | A→C         | <i>cdd</i>       | D253A     | C40K         |
| 17.1                       | 0.254         | [0.135, 0.420] | 3779580         | A→C         | ECB_03519        | L70R      |              |
| 17.0                       | 0.145         | [0.073, 0.241] | 389819          | A→C         | <i>proY</i>      | V137V     |              |
| 17.0                       | 0.222         | [0.113, 0.379] | 1022287         | T→G         | <i>pyrD</i>      | N143K     |              |
| 16.9                       | 0.119         | [0.062, 0.208] | 3808788         | T→G         | <i>uhpB</i>      | K427N     |              |
| 16.8                       | 0.180         | [0.087, 0.300] | 118051          | T→G         | <i>hofC</i>      | K160Q     |              |
| 16.7                       | 0.150         | [0.073, 0.253] | 216747          | A→C         | <i>rof</i>       | C10G      |              |
| 16.7                       | 0.419         | [0.197, 0.670] | 3291356         | A→C         | <i>gltB</i>      | E497A     |              |
| 16.7                       | 0.242         | [0.115, 0.403] | 1402836         | A→C         | <i>abgR/ydaL</i> | -         | C40K         |
| 16.5                       | 0.182         | [0.090, 0.314] | 1055171         | T→G         | <i>appC</i>      | F114C     |              |
| 16.5                       | 0.251         | [0.122, 0.422] | 4490502         | T→G         | ECB_04147        | I44S      | C40K         |
| 16.2                       | 0.254         | [0.121, 0.422] | 1166321         | T→G         | <i>acpP</i>      | A46A      | C40K         |
| 16.1                       | 0.243         | [0.118, 0.413] | 2795341         | T→G         | <i>ygcG</i>      | F235V     | C40K         |

**Table S7 | SNPs predicted in 40K mixed-population sample**

| <b>-log<sub>10</sub> E</b> | <b>fr new</b> | <b>95% CL</b>  | <b>position</b> | <b>base</b> | <b>gene</b>           | <b>aa</b> | <b>notes</b> |
|----------------------------|---------------|----------------|-----------------|-------------|-----------------------|-----------|--------------|
| 16.0                       | 0.127         | [0.062, 0.218] | 2762605         | T→G         | <i>nlpD</i>           | Q337P     |              |
| 16.0                       | 0.563         | [0.299, 0.804] | 3192262         | T→G         | <i>tdcG</i>           | K141T     |              |
| 15.9                       | 0.216         | [0.103, 0.368] | 2444520         | T→G         | <i>yfeO</i>           | D222E     |              |
| 15.5                       | 0.140         | [0.070, 0.247] | 1276107         | T→G         | <i>narX</i>           | I554I     |              |
| 15.4                       | 0.122         | [0.060, 0.212] | 4418434         | A→C         | <i>ytfG</i>           | D197E     |              |
| 15.2                       | 0.158         | [0.084, 0.263] | 3173476         | A→C         | <i>ygjU</i>           | N167H     |              |
| 15.1                       | 0.104         | [0.052, 0.187] | 2730429         | A→C         | <i>hypF</i>           | A619A     |              |
| 14.9                       | 0.231         | [0.111, 0.393] | 3737701         | T→G         | <i>waaL</i>           | G42G      | C40K         |
| 14.9                       | 0.298         | [0.125, 0.512] | 393379          | G→T         | <i>yajB/queA</i>      | -         | C40K         |
| 14.8                       | 0.743         | [0.536, 0.891] | 4140780         | T→G         | <i>udhA/yijC</i>      | -         |              |
| 14.4                       | 0.169         | [0.083, 0.286] | 2876390         | A→C         | <i>araE</i>           | S138S     |              |
| 14.4                       | 0.260         | [0.124, 0.433] | 494275          | T→G         | <i>ybbP</i>           | G564G     |              |
| 14.4                       | 0.156         | [0.079, 0.279] | 1952123         | T→G         | <i>cheW/cheA</i>      | -         | C40K         |
| 14.1                       | 0.135         | [0.064, 0.243] | 3857126         | A→C         | <i>yieG/yieH</i>      | -         |              |
| 14.0                       | 0.156         | [0.073, 0.260] | 4247198         | A→C         | <i>tyrB</i>           | N385H     |              |
| 14.0                       | 0.191         | [0.091, 0.333] | 3312654         | A→C         | <i>argR</i>           | K19Q      |              |
| 13.6                       | 0.296         | [0.143, 0.495] | 1518024         | A→C         | <i>narU</i>           | I63S      | C40K         |
| 13.5                       | 0.192         | [0.089, 0.326] | 3365940         | T→G         | <i>mscL</i>           | I4M       |              |
| 13.4                       | 0.123         | [0.060, 0.215] | 2315295         | T→G         | <i>yfbG</i>           | H248Q     |              |
| 13.4                       | 0.701         | [0.459, 0.883] | 1798556         | A→C         | <i>celB/celA</i>      | -         |              |
| 13.4                       | 0.192         | [0.084, 0.341] | 4136696         | T→G         | <i>argB/argH</i>      | -         |              |
| 13.3                       | 0.195         | [0.093, 0.364] | 1758779         | T→G         | <i>ydiS</i>           | S39R      |              |
| 13.3                       | 0.189         | [0.088, 0.348] | 1835977         | A→C         | <i>ydjJ</i>           | V29G      |              |
| 13.1                       | 0.173         | [0.079, 0.314] | 3041599         | A→C         | <i>yghJ</i>           | Y1469D    |              |
| 13.1                       | 0.281         | [0.121, 0.494] | 2131826         | C→A         | <i>fbaB</i>           | G290C     |              |
| 13.1                       | 0.122         | [0.054, 0.207] | 4618009         | T→G         | <i>yjjK</i>           | N243H     |              |
| 12.9                       | 0.106         | [0.046, 0.197] | 2873005         | G→T         | <i>lysA</i>           | P172P     |              |
| 12.9                       | 0.439         | [0.198, 0.702] | 4557948         | A→C         | <i>yjiW/hsdS</i>      | -         |              |
| 12.7                       | 0.164         | [0.079, 0.297] | 703655          | A→C         | <i>kdpE</i>           | G58G      |              |
| 12.6                       | 0.212         | [0.099, 0.382] | 1364853         | T→G         | <i>goaG</i>           | N312K     | C40K         |
| 12.5                       | 0.396         | [0.174, 0.642] | 1732027         | A→C         | <i>ydhY/ydhZ</i>      | -         | C40K         |
| 12.5                       | 0.154         | [0.070, 0.286] | 4484606         | A→C         | <i>insG</i>           | Y240D     |              |
| 12.3                       | 0.167         | [0.072, 0.291] | 405415          | T→G         | <i>pgpA</i>           | D135E     |              |
| 12.2                       | 0.175         | [0.079, 0.320] | 801906          | A→C         | <i>bioA/bioB</i>      | -         |              |
| 12.1                       | 0.282         | [0.127, 0.473] | 1456048         | A→C         | <i>hrpA</i>           | R1200R    | C40K         |
| 12.0                       | 0.170         | [0.075, 0.303] | 3417998         | T→G         | <i>argD</i>           | K30Q      |              |
| 11.9                       | 0.216         | [0.097, 0.382] | 2691643         | A→C         | <i>yqaE</i>           | W47G      |              |
| 11.9                       | 0.172         | [0.076, 0.308] | 3999534         | T→G         | <i>ubiB</i>           | F280V     |              |
| 11.8                       | 0.146         | [0.066, 0.255] | 673660          | T→G         | <i>ybeX</i>           | I74L      |              |
| 11.8                       | 0.169         | [0.072, 0.302] | 4216920         | T→G         | <i>yjbH</i>           | W119G     |              |
| 11.7                       | 0.120         | [0.055, 0.214] | 3617602         | A→C         | <i>bcsC</i>           | I355S     |              |
| 11.5                       | 0.131         | [0.059, 0.246] | 2973709         | A→C         | <i>metK/galP</i>      | -         |              |
| 11.3                       | 0.132         | [0.058, 0.242] | 4413097         | T→G         | <i>ytfB</i>           | S207R     |              |
| 11.2                       | 0.105         | [0.045, 0.201] | 817450          | T→G         | <i>ybhQ</i>           | W66G      |              |
| 10.9                       | 0.120         | [0.052, 0.224] | 2301878         | A→C         | <i>glpB</i>           | L302L     |              |
| 10.8                       | 0.127         | [0.046, 0.248] | 1380364         | G→T         | <i>ompG</i>           | A17S      |              |
| 10.8                       | 0.148         | [0.065, 0.267] | 4406742         | T→G         | ECB_04072             | V505V     |              |
| 10.7                       | 0.185         | [0.080, 0.352] | 2808644         | A→C         | <i>gudX</i>           | D344E     |              |
| 10.5                       | 0.179         | [0.073, 0.327] | 1246198         | A→C         | <i>treA</i>           | S443R     |              |
| 10.5                       | 0.106         | [0.047, 0.200] | 4367937         | A→C         | <i>psd</i>            | F193L     |              |
| 10.4                       | 0.150         | [0.064, 0.289] | 3692783         | T→G         | <i>selB</i>           | D591A     |              |
| 10.4                       | 0.162         | [0.069, 0.315] | 1278238         | T→G         | <i>narK</i>           | C44W      |              |
| 10.4                       | 0.137         | [0.060, 0.249] | 3578670         | A→C         | <i>gor/arsR</i>       | -         |              |
| 10.4                       | 0.166         | [0.068, 0.307] | 2180706         | T→G         | <i>yohl</i>           | I307L     |              |
| 10.3                       | 0.162         | [0.068, 0.307] | 2792123         | A→C         | <i>ygcE/ECB_02621</i> | -         |              |
| 10.3                       | 0.092         | [0.040, 0.172] | 2483050         | A→C         | <i>yffI</i>           | R66R      |              |

**Table S7 | SNPs predicted in 40K mixed-population sample**

| <b>-log<sub>10</sub> E</b> | <b>fr new</b> | <b>95% CL</b>  | <b>position</b> | <b>base</b> | <b>gene</b>      | <b>aa</b> | <b>notes</b> |
|----------------------------|---------------|----------------|-----------------|-------------|------------------|-----------|--------------|
| 10.2                       | 0.153         | [0.065, 0.295] | 3696572         | A→C         | <i>yibF</i>      | F26C      |              |
| 10.1                       | 0.124         | [0.055, 0.232] | 1036813         | T→G         | <i>ompA</i>      | D111A     |              |
| 10.1                       | 0.157         | [0.065, 0.296] | 938865          | T→G         | <i>macB</i>      | W605G     |              |
| 10.1                       | 0.110         | [0.046, 0.215] | 1672433         | G→T         | <i>uidA</i>      | G278G     |              |
| 10.0                       | 0.177         | [0.073, 0.328] | 641854          | T→G         | <i>lipA</i>      | K316Q     |              |
| 10.0                       | 0.216         | [0.090, 0.389] | 2133834         | T→G         | <i>yegT</i>      | D295E     |              |
| 9.9                        | 0.158         | [0.068, 0.308] | 2962321         | T→G         | <i>yggP</i>      | K296T     |              |
| 9.7                        | 0.178         | [0.075, 0.335] | 1288327         | T→G         | <i>purU</i>      | E31A      |              |
| 9.6                        | 0.149         | [0.061, 0.283] | 393663          | A→C         | <i>queA</i>      | K77T      |              |
| 9.5                        | 0.127         | [0.053, 0.245] | 1079282         | T→G         | <i>cbpA</i>      | K262Q     |              |
| 9.4                        | 0.110         | [0.048, 0.209] | 2729727         | A→C         | <i>ygbD</i>      | E319A     |              |
| 9.4                        | 0.140         | [0.058, 0.268] | 2813426         | T→G         | <i>yqcC/syd</i>  | -         |              |
| 9.3                        | 0.132         | [0.055, 0.258] | 4094737         | T→G         | <i>glpX</i>      | K109Q     |              |
| 9.2                        | 0.174         | [0.076, 0.336] | 3657614         | A→C         | <i>yiaA</i>      | I69R      | C40K         |
| 9.0                        | 0.120         | [0.048, 0.228] | 3666491         | A→C         | <i>xylR</i>      | I353L     |              |
| 9.0                        | 0.069         | [0.025, 0.143] | 74122           | G→T         | <i>araC/yabl</i> | -         |              |
| 9.0                        | 0.083         | [0.037, 0.158] | 2168204         | T→G         | <i>yehX</i>      | Q134P     |              |
| 8.9                        | 0.103         | [0.041, 0.199] | 451643          | T→G         | <i>maa</i>       | I115L     |              |
| 8.8                        | 0.184         | [0.076, 0.344] | 218211          | A→C         | <i>cutF</i>      | Q34P      |              |
| 8.7                        | 0.086         | [0.032, 0.175] | 2338134         | C→T         | <i>nuoL</i>      | M168I     |              |
| 8.5                        | 0.139         | [0.057, 0.268] | 556439          | T→G         | ECB_00513        | M575R     |              |
| 8.4                        | 0.088         | [0.036, 0.178] | 4433618         | T→G         | <i>ytfQ</i>      | L136W     |              |
| 8.3                        | 0.112         | [0.045, 0.211] | 1162917         | A→C         | <i>plsX</i>      | E243A     |              |
| 8.3                        | 0.094         | [0.040, 0.190] | 1699783         | A→C         | <i>ydhK</i>      | I157L     |              |
| 8.3                        | 0.141         | [0.060, 0.278] | 1471239         | T→G         | <i>tehA</i>      | R186R     |              |
| 8.2                        | 0.091         | [0.036, 0.174] | 3771517         | A→C         | <i>yicl</i>      | F688C     |              |
| 8.2                        | 0.158         | [0.063, 0.289] | 2016160         | T→G         | <i>yeeF</i>      | E449A     |              |
| 8.1                        | 0.097         | [0.039, 0.185] | 1681829         | T→G         | <i>blr</i>       | Y29D      |              |
| 8.1                        | 0.082         | [0.033, 0.162] | 4030951         | A→C         | <i>hemN</i>      | T204P     |              |
| 7.9                        | 0.145         | [0.059, 0.272] | 895571          | A→C         | ECB_00834        | E227A     |              |
| 7.8                        | 0.088         | [0.034, 0.171] | 468423          | A→C         | <i>htpG</i>      | T413P     |              |
| 7.7                        | 0.076         | [0.031, 0.153] | 3988708         | G→T         | <i>ysgA</i>      | V127V     |              |
| 7.6                        | 0.108         | [0.045, 0.215] | 1804366         | T→G         | <i>astB</i>      | N387H     |              |
| 7.4                        | 0.175         | [0.058, 0.358] | 2600080         | G→T         | <i>yphF/yphG</i> | -         |              |
| 7.3                        | 0.137         | [0.052, 0.274] | 3047185         | A→C         | <i>yghK</i>      | F329L     |              |
| 7.2                        | 0.081         | [0.033, 0.161] | 1706209         | A→C         | <i>rnt/lhr</i>   | -         |              |
| 7.2                        | 0.124         | [0.045, 0.247] | 672941          | A→C         | <i>Int</i>       | I12M      |              |
| 7.1                        | 0.178         | [0.065, 0.337] | 2575904         | A→C         | <i>pepB</i>      | L425*     |              |
| 7.1                        | 0.089         | [0.037, 0.176] | 3650621         | A→C         | <i>cspA</i>      | N39H      |              |
| 6.9                        | 0.120         | [0.049, 0.223] | 4046297         | T→G         | <i>yihQ</i>      | T401P     |              |
| 6.8                        | 0.123         | [0.047, 0.247] | 2646159         | T→G         | <i>kgfP</i>      | K361Q     |              |
| 6.8                        | 0.107         | [0.039, 0.215] | 1562913         | A→C         | <i>ydeT</i>      | L347*     |              |
| 6.7                        | 0.114         | [0.044, 0.234] | 3670458         | A→C         | <i>avtA</i>      | I100L     |              |
| 6.7                        | 0.135         | [0.055, 0.258] | 1778924         | T→G         | <i>thrS</i>      | E305A     |              |
| 6.5                        | 0.134         | [0.050, 0.262] | 2755220         | T→G         | <i>pphB</i>      | Y201D     |              |
| 6.5                        | 0.110         | [0.041, 0.219] | 1523598         | A→C         | <i>fdnG</i>      | K683T     |              |
| 6.4                        | 0.093         | [0.034, 0.190] | 742964          | A→C         | <i>sucB</i>      | K218Q     |              |
| 6.4                        | 0.082         | [0.029, 0.177] | 1319860         | T→G         | <i>trpE</i>      | P227P     |              |
| 6.4                        | 0.137         | [0.052, 0.273] | 2293250         | A→C         | <i>nrdA</i>      | Q562H     |              |
| 6.3                        | 0.138         | [0.053, 0.279] | 2959712         | A→C         | <i>epd/yggC</i>  | -         |              |
| 6.1                        | 0.105         | [0.038, 0.209] | 4453550         | A→C         | <i>mgtA</i>      | L883F     |              |
| 6.0                        | 0.072         | [0.028, 0.139] | 2719319         | A→C         | <i>ygaD/mltB</i> | -         |              |
| 6.0                        | 0.084         | [0.032, 0.180] | 4140162         | A→C         | <i>udhA</i>      | Y164D     |              |
| 5.9                        | 0.105         | [0.038, 0.209] | 3383769         | T→G         | <i>gspC</i>      | I96S      |              |
| 5.8                        | 0.097         | [0.037, 0.203] | 1988512         | A→C         | <i>yeeJ</i>      | K1884T    |              |
| 5.7                        | 0.102         | [0.037, 0.208] | 1052834         | T→G         | <i>hyaC</i>      | F226L     |              |

**Table S7 | SNPs predicted in 40K mixed-population sample**

| <b>-log<sub>10</sub> E</b> | <b>fr new</b> | <b>95% CL</b>  | <b>position</b> | <b>base</b> | <b>gene</b>            | <b>aa</b> | <b>notes</b> |
|----------------------------|---------------|----------------|-----------------|-------------|------------------------|-----------|--------------|
| 5.7                        | 0.089         | [0.035, 0.176] | 2016539         | T→G         | <i>yeeF</i>            | K323Q     |              |
| 5.7                        | 0.092         | [0.035, 0.193] | 3191418         | A→C         | <i>tdcG</i>            | D422E     |              |
| 5.4                        | 0.121         | [0.050, 0.241] | 250428          | T→G         | <i>yafK/yafQ</i>       | -         |              |
| 5.3                        | 0.208         | [0.067, 0.407] | 2599497         | A→C         | <i>yphF</i>            | V190V     |              |
| 5.3                        | 0.038         | [0.013, 0.087] | 2714813         | C→A         | <i>alaS</i>            | S686S     |              |
| 5.1                        | 0.100         | [0.037, 0.208] | 3949700         | T→G         | <i>hemX</i>            | Q399H     |              |
| 5.1                        | 0.136         | [0.048, 0.272] | 3554394         | A→C         | <i>yhhH</i>            | Q103P     |              |
| 5.0                        | 0.073         | [0.031, 0.135] | 2731818         | A→C         | <i>hypF</i>            | F156L     |              |
| 4.9                        | 0.131         | [0.044, 0.282] | 2499798         | T→G         | <i>talA</i>            | F102C     |              |
| 4.9                        | 0.107         | [0.035, 0.236] | 308454          | T→G         | <i>yahD</i>            | Y176D     |              |
| 4.9                        | 0.063         | [0.020, 0.146] | 3113151         | C→A         | <i>tolC</i>            | R289S     |              |
| 4.7                        | 0.108         | [0.036, 0.231] | 4151984         | A→C         | <i>murB</i>            | N106T     |              |
| 4.7                        | 0.093         | [0.030, 0.201] | 3845261         | C→A         | <i>yidD</i>            | P29T      |              |
| 4.6                        | 0.102         | [0.033, 0.214] | 1869085         | T→G         | <i>yeaY</i>            | K9T       |              |
| 4.6                        | 0.132         | [0.043, 0.286] | 4038587         | G→T         | <i>bipA/yihL</i>       | -         |              |
| 4.6                        | 0.109         | [0.038, 0.240] | 466780          | T→G         | <i>recR</i>            | G103G     |              |
| 4.4                        | 0.100         | [0.033, 0.221] | 3468712         | A→C         | <i>yhgF/feoA</i>       | -         |              |
| 4.3                        | 0.107         | [0.036, 0.233] | 72188           | A→C         | <i>araB</i>            | F222C     |              |
| 4.3                        | 0.111         | [0.036, 0.236] | 1020717         | A→C         | <i>ycbV</i>            | N63T      |              |
| 4.0                        | 0.081         | [0.029, 0.161] | 1584279         | T→G         | <i>sotB</i>            | L70*      |              |
| 4.0                        | 0.095         | [0.030, 0.206] | 4156793         | T→G         | <i>tuf/secE</i>        | -         |              |
| 3.9                        | 0.109         | [0.036, 0.236] | 1055523         | T→G         | <i>appC</i>            | I231M     |              |
| 3.9                        | 0.094         | [0.030, 0.203] | 922966          | A→C         | <i>ybjS</i>            | I165M     |              |
| 3.9                        | 0.097         | [0.032, 0.218] | 3082322         | T→G         | <i>yghZ</i>            | F85C      |              |
| 3.9                        | 0.071         | [0.023, 0.169] | 2686836         | T→G         | <i>gabD</i>            | L295*     |              |
| 3.8                        | 0.074         | [0.022, 0.158] | 1579757         | T→G         | <i>yneH</i>            | N180H     |              |
| 3.8                        | 0.314         | [0.090, 0.613] | 2793464         | A→C         | ECB_02621/ <i>ygcF</i> | -         |              |
| 3.8                        | 0.140         | [0.047, 0.297] | 33522           | T→G         | <i>dapB/carA</i>       | -         |              |
| 3.7                        | 0.085         | [0.027, 0.181] | 355626          | T→G         | <i>tauB</i>            | L171R     |              |
| 3.7                        | 0.069         | [0.022, 0.149] | 654574          | T→G         | <i>ripB</i>            | E66A      |              |
| 3.7                        | 0.081         | [0.026, 0.176] | 3172721         | A→C         | <i>ygjT/ygjU</i>       | -         |              |
| 3.6                        | 0.080         | [0.025, 0.169] | 1459135         | A→C         | <i>gapC</i>            | L304*     |              |
| 3.5                        | 0.089         | [0.029, 0.199] | 3664231         | T→G         | <i>xylH</i>            | F19C      |              |
| 3.5                        | 0.072         | [0.022, 0.158] | 1339936         | A→C         | <i>yciM</i>            | E336A     |              |
| 3.5                        | 0.071         | [0.020, 0.176] | 1313641         | C→A         | <i>yciG/trpA</i>       | -         |              |
| 3.4                        | 0.081         | [0.025, 0.187] | 3319800         | A→C         | <i>tldD</i>            | F40L      |              |
| 3.3                        | 0.080         | [0.027, 0.178] | 2875812         | A→C         | <i>araE</i>            | F331C     |              |
| 3.3                        | 0.334         | [0.098, 0.654] | 3397904         | A→C         | <i>chiA/tuf</i>        | -         |              |
| 3.3                        | 0.109         | [0.035, 0.231] | 1090410         | A→C         | <i>ycdM/ycdC</i>       | -         |              |
| 3.2                        | 0.040         | [0.011, 0.101] | 351184          | G→T         | <i>frmA</i>            | L249M     |              |
| 3.2                        | 0.071         | [0.023, 0.155] | 2839535         | T→G         | <i>ygdK</i>            | L125L     |              |
| 3.1                        | 0.107         | [0.037, 0.240] | 2134647         | T→G         | <i>yegU</i>            | C142G     |              |
| 3.1                        | 0.074         | [0.023, 0.166] | 3556641         | A→C         | <i>yhhJ</i>            | M284R     |              |
| 3.0                        | 0.154         | [0.042, 0.338] | 1142419         | A→C         | <i>mviN</i>            | L3F       |              |
| 3.0                        | 0.144         | [0.040, 0.326] | 971773          | A→C         | <i>focA/ycaO</i>       | -         |              |
| 2.8                        | 0.072         | [0.020, 0.176] | 1837688         | C→A         | <i>ydjL</i>            | A292S     |              |
| 2.6                        | 0.117         | [0.033, 0.275] | 4320887         | T→G         | <i>melA</i>            | I88S      |              |
| 2.5                        | 0.095         | [0.026, 0.226] | 3703283         | T→G         | <i>yibG</i>            | L138R     |              |
| 2.4                        | 0.120         | [0.034, 0.282] | 2794265         | A→C         | <i>ygcF</i>            | L28V      |              |
| 2.3                        | 0.094         | [0.025, 0.230] | 2989481         | T→G         | <i>mutY</i>            | L270V     |              |
| 2.2                        | 0.086         | [0.024, 0.204] | 1005810         | T→G         | <i>asnS</i>            | Q89H      |              |
| 2.1                        | 0.046         | [0.011, 0.116] | 1883142         | G→T         | <i>manZ</i>            | T226T     |              |
| 2.0                        | 0.074         | [0.021, 0.182] | 4204758         | T→G         | <i>methH</i>           | L667R     |              |
| 2.0                        | 0.778         | [0.493, 0.954] | 3942051         | A→C         | <i>wecG</i>            | E99A      | C40K         |
| 1.9                        | 0.094         | [0.025, 0.217] | 3021700         | T→G         | ECB_02821              | I329L     |              |
| 1.9                        | 0.075         | [0.020, 0.175] | 466436          | A→C         | <i>ybaB</i>            | G98G      |              |

**Table S7 | SNPs predicted in 40K mixed-population sample**

| <b>-log<sub>10</sub> E</b> | <b>fr new</b> | <b>95% CL</b>  | <b>position</b> | <b>base</b> | <b>gene</b>            | <b>aa</b> | <b>notes</b> |
|----------------------------|---------------|----------------|-----------------|-------------|------------------------|-----------|--------------|
| 1.9                        | 0.090         | [0.024, 0.208] | 3590557         | A→C         | <i>yhiV</i>            | Q218P     |              |
| 1.9                        | 0.145         | [0.040, 0.326] | 4419691         | T→G         | <i>cpdB</i>            | K623N     |              |
| 1.8                        | 0.076         | [0.020, 0.176] | 1598388         | A→C         | <i>ydfI</i>            | L98W      |              |
| 1.8                        | 0.052         | [0.012, 0.152] | 2877311         | T→A         | <i>kduD</i>            | Y190F     |              |
| 1.7                        | 0.083         | [0.024, 0.205] | 4406285         | T→G         | ECB_04072              | I658L     |              |
| 1.7                        | 0.103         | [0.029, 0.248] | 1517279         | A→C         | <i>narU</i>            | D311E     |              |
| 1.7                        | 0.064         | [0.017, 0.155] | 2609986         | A→C         | <i>yfhG</i>            | W74G      |              |
| 1.6                        | 0.087         | [0.022, 0.200] | 4155223         | T→G         | <i>tyrU/glyT</i>       | -         |              |
| 1.6                        | 0.076         | [0.021, 0.186] | 449040          | T→G         | <i>ybaA</i>            | F101C     |              |
| 1.6                        | 0.063         | [0.018, 0.161] | 1934678         | A→C         | <i>torZ</i>            | M367R     |              |
| 1.6                        | 0.089         | [0.021, 0.215] | 3200806         | A→C         | <i>tdcR/yhaB</i>       | -         |              |
| 1.5                        | 0.076         | [0.016, 0.209] | 3399298         | C→A         | <i>tuf/fusA</i>        | -         |              |
| 1.5                        | 0.067         | [0.020, 0.148] | 2929893         | T→G         | <i>bglA</i>            | F160C     |              |
| 1.5                        | 0.067         | [0.019, 0.151] | 3634666         | A→C         | <i>dppC</i>            | L185R     |              |
| 1.5                        | 0.059         | [0.016, 0.142] | 1963803         | T→G         | <i>araF</i>            | K107T     |              |
| 1.5                        | 0.086         | [0.024, 0.203] | 4209909         | A→C         | <i>yjbC</i>            | M209L     |              |
| 1.4                        | 0.074         | [0.021, 0.178] | 814162          | A→C         | <i>ybhM/ybhN</i>       | -         |              |
| 1.4                        | 0.063         | [0.016, 0.148] | 203759          | A→C         | <i>hlpA</i>            | S146R     |              |
| 1.3                        | 0.067         | [0.017, 0.150] | 756377          | T→G         | <i>tolQ</i>            | S115A     |              |
| 1.3                        | 0.058         | [0.018, 0.139] | 445257          | A→C         | <i>amtB</i>            | A75A      |              |
| 1.3                        | 0.062         | [0.016, 0.152] | 4026617         | T→G         | <i>polA</i>            | V452G     |              |
| 1.3                        | 0.042         | [0.008, 0.117] | 4336545         | T→G         | <i>cadA</i>            | T265P     |              |
| 1.2                        | 0.064         | [0.018, 0.147] | 1051212         | A→C         | <i>hyaB</i>            | S290R     |              |
| 1.2                        | 0.064         | [0.017, 0.154] | 3037779         | C→A         | ECB_02838              | G406W     |              |
| 1.2                        | 0.060         | [0.017, 0.151] | 904280          | A→C         | ECB_00850              | D118A     |              |
| 1.2                        | 0.052         | [0.014, 0.124] | 4423524         | A→C         | <i>ytfK</i>            | E55A      |              |
| 1.1                        | 0.047         | [0.010, 0.132] | 181987          | G→T         | <i>pfs</i>             | I3I       |              |
| 1.1                        | 0.072         | [0.018, 0.172] | 4172395         | A→C         | <i>thiS</i>            | V18V      |              |
| 1.1                        | 0.054         | [0.014, 0.130] | 3797323         | T→G         | <i>yicK</i>            | L147V     |              |
| 1.1                        | 0.057         | [0.016, 0.139] | 3658475         | T→G         | <i>xyiB</i>            | E452A     |              |
| 1.1                        | 0.048         | [0.013, 0.121] | 1861066         | A→C         | <i>yeaU</i>            | N193H     |              |
| 1.1                        | 0.057         | [0.016, 0.142] | 1253910         | A→C         | <i>ycgV</i>            | D731E     |              |
| 1.0                        | 0.060         | [0.017, 0.145] | 3700904         | T→G         | <i>rhsA</i>            | L1343R    |              |
| 1.0                        | 0.045         | [0.009, 0.122] | 4508445         | C→A         | <i>sgcQ</i>            | R204L     |              |
| 0.9                        | 0.065         | [0.017, 0.146] | 3806810         | A→G         | <i>uhpT</i>            | F97S      |              |
| 0.9                        | 0.053         | [0.015, 0.132] | 2028096         | T→G         | <i>wzzB</i>            | I71L      |              |
| 0.9                        | 0.084         | [0.024, 0.203] | 4495466         | A→C         | ECB_04152/ <i>fecE</i> | -         |              |
| 0.9                        | 0.085         | [0.022, 0.193] | 3756427         | A→C         | <i>dinD</i>            | A108A     |              |
| 0.8                        | 0.041         | [0.010, 0.104] | 2817899         | T→G         | <i>sdaC</i>            | S248A     |              |
| 0.8                        | 0.069         | [0.018, 0.165] | 1680771         | T→G         | <i>ydgJ</i>            | R244R     |              |
| 0.7                        | 0.063         | [0.014, 0.180] | 3675671         | G→T         | <i>yiaN</i>            | G138W     |              |
| 0.7                        | 0.044         | [0.009, 0.125] | 163881          | C→A         | <i>sfsA</i>            | V153F     |              |
| 0.7                        | 0.100         | [0.020, 0.258] | 2699214         | G→T         | <i>nrdF/proV</i>       | -         |              |
| 0.6                        | 0.081         | [0.023, 0.196] | 4485694         | T→G         | <i>insG/yjhB</i>       | -         |              |
| 0.6                        | 0.043         | [0.009, 0.116] | 2090101         | G→A         | <i>yegN</i>            | P577P     |              |
| 0.4                        | 0.046         | [0.013, 0.114] | 2932829         | A→C         | <i>gcvP</i>            | S655S     |              |
| 0.4                        | 0.104         | [0.022, 0.273] | 3570553         | T→G         | <i>yhiO/uspA</i>       | -         |              |
| 0.4                        | 0.100         | [0.019, 0.266] | 498916          | A→C         | <i>rhsD</i>            | G1163G    |              |
| 0.2                        | 0.073         | [0.020, 0.176] | 311428          | A→C         | <i>yahG</i>            | D152A     |              |
| 0.2                        | 0.059         | [0.016, 0.144] | 3508874         | T→G         | <i>gntK</i>            | N58H      |              |
| 0.1                        | 0.074         | [0.017, 0.209] | 33663           | T→G         | <i>dapB/carA</i>       | -         |              |
| 0.0                        | 0.065         | [0.008, 0.190] | 1455359         | C→A         | <i>hrpA</i>            | Q971K     |              |
| 0.0                        | 0.043         | [0.008, 0.113] | 3741971         | T→A         | <i>waaT</i>            | -         |              |
| 0.0                        | 0.086         | [0.022, 0.207] | 719786          | T→G         | <i>ybfD/ybgA</i>       | -         |              |
